# Supplementary material
Source: HighWire-hosted journal article supplement (https://www.jneurosci.org/content/39/24/4636)
Supplement: inline-supplementary-material-6 [file inline-supplementary-material-6.xlsx]

## Sheet: Whole cell lysate
Figure 6-2. Quantitative MS data of whole cell lysate of WT and PTCD1 KO cells.
Protein	Uniprot Accession Number	log2 FC	adjusted p-value
1433B_HUMAN	P31946	0.361525	0.771686
1433B_HUMAN	P31946	-1.77207	0.769198
1433E_HUMAN	P62258	0.0167587	0.977247
1433F_HUMAN	Q04917	-0.0644594	0.952074
1433G_HUMAN	P61981	-0.423606	0.728611
1433S_HUMAN	P31947	0.316249	0.785011
1433T_HUMAN	P27348	0.254799	0.866421
1433Z_HUMAN	P63104	0.425915	0.740882
1A68_HUMAN	P01891	-0.628971	0.139209
1A69_HUMAN	P10316	-0.253976	0.917202
1B15_HUMAN	P30464	-0.928556	0.136206
1B15_HUMAN	P30464	-0.703965	0.515306
1C06_HUMAN	Q29963	-2.30477	0.310996
1C07_HUMAN	P10321	-0.778937	0.412475
1C12_HUMAN	P30508	-0.695499	0.456119
1C12_HUMAN	P30508	-0.416	0.771686
2A5D_HUMAN	Q14738	-0.478548	0.771686
2A5E_HUMAN	Q16537	-1.61676	0.599432
2A5G_HUMAN	Q13362	-0.926215	0.535447
2AAA_HUMAN	P30153	0.308577	0.469228
2AAB_HUMAN	P30154	-0.399635	0.889142
2ABA_HUMAN	P63151	1.54402	0.0255614
3HIDH_HUMAN	P31937	-0.744081	0.359937
3MG_HUMAN	P29372	-0.707557	0.26572
41_HUMAN	P11171	0.371024	0.916856
4F2_HUMAN	P08195	0.385012	0.49611
5NT3A_HUMAN	Q9H0P0	-0.768994	0.515964
5NTC_HUMAN	P49902	0.943068	0.230039
5NTD_HUMAN	P21589	2.26707	0.244247
68MP_HUMAN	P56378	-1.72588	0.309283
6PGD_HUMAN	P52209	0.427603	0.703983
6PGL_HUMAN	O95336	0.907318	0.14827
8ODP_HUMAN	P36639	-0.181804	0.893357
A16A1_HUMAN	Q8IZ83	0.394627	0.776819
A4_HUMAN	P05067	-0.546432	0.600195
A7L3B_HUMAN	Q96GX2	0.152309	0.919499
AAAS_HUMAN	Q9NRG9	0.401374	0.45786
AAAT_HUMAN	Q15758	0.780928	0.215665
AAED1_HUMAN	Q7RTV5	-0.698006	0.67489
AAKB2_HUMAN	O43741	0.602973	0.312365
AAKG1_HUMAN	P54619	0.293808	0.51843
AAMDC_HUMAN	Q9H7C9	2.57707	0.17348
AAMP_HUMAN	Q13685	1.9352	0.211295
AAPK1_HUMAN	Q13131	0.369216	0.452903
AAR2_HUMAN	Q9Y312	-1.05586	0.622128
AASD1_HUMAN	Q9BTE6	-1.25888	0.54071
AASS_HUMAN	Q9UDR5	0.0802945	0.953611
AATC_HUMAN	P17174	0.331198	0.416688
AATF_HUMAN	Q9NY61	0.0675008	0.964189
AATM_HUMAN	P00505	-0.0724566	0.895637
AB17B_HUMAN	Q5VST6	1.13965	0.778044
ABCA2_HUMAN	Q9BZC7	0.0658444	0.952074
ABCB6_HUMAN	Q9NP58	-0.121845	0.808366
ABCB7_HUMAN	O75027	-0.0553841	0.953889
ABCB8_HUMAN	Q9NUT2	0.291366	0.934711
ABCBA_HUMAN	Q9NRK6	0.382429	0.771686
ABCD1_HUMAN	P33897	-0.0894972	0.925676
ABCD3_HUMAN	P28288	0.247676	0.758114
ABCE1_HUMAN	P61221	0.606888	0.499689
ABCF1_HUMAN	Q8NE71	-0.470197	0.576132
ABCF2_HUMAN	Q9UG63	-0.816762	0.486787
ABCF3_HUMAN	Q9NUQ8	-0.41538	0.376735
ABCG2_HUMAN	Q9UNQ0	2.02182	0.683217
ABD12_HUMAN	Q8N2K0	0.790268	0.695128
ABHD5_HUMAN	Q8WTS1	1.41121	0.16475
ABHD6_HUMAN	Q9BV23	0.486863	0.571636
ABHDA_HUMAN	Q9NUJ1	0.157439	0.877882
ABHDB_HUMAN	Q8NFV4	0.260714	0.806622
ABHDD_HUMAN	Q7L211	0.0342899	0.981511
ABHEA_HUMAN	Q9BUJ0	-0.595646	0.81689
ABHEB_HUMAN	Q96IU4	-0.845783	0.328012
ABHGA_HUMAN	O95870	0.291366	0.771686
ABI1_HUMAN	Q8IZP0	0.127137	0.824598
ABLM1_HUMAN	O14639	1.59688	0.496811
ABLM3_HUMAN	O94929	2.40027	0.370901
ABRAL_HUMAN	Q9P1F3	-0.0431514	0.903644
ABT1_HUMAN	Q9ULW3	-1.40689	0.505396
ACACA_HUMAN	Q13085	-0.150795	0.955198
ACACB_HUMAN	O00763	0.50686	0.744842
ACAD8_HUMAN	Q9UKU7	0.291366	0.771686
ACAD9_HUMAN	Q9H845	0.0348704	0.961383
ACADL_HUMAN	P28330	0.726925	0.771686
ACADM_HUMAN	P11310	0.368187	0.728682
ACADS_HUMAN	P16219	0.291366	0.771686
ACADV_HUMAN	P49748	0.827973	0.173512
ACATN_HUMAN	O00400	0.291366	0.771686
ACBD5_HUMAN	Q5T8D3	0.169704	0.918549
ACBP_HUMAN	P07108	-0.10069	0.952074
ACD11_HUMAN	Q709F0	0.660585	0.439718
ACDSB_HUMAN	P45954	0.291366	0.771686
ACINU_HUMAN	Q9UKV3	-0.194537	0.824598
ACKR3_HUMAN	P25106	-1.2336	0.317811
ACL6A_HUMAN	O96019	0.106016	0.859555
ACLY_HUMAN	P53396	-0.861902	0.14827
ACO13_HUMAN	Q9NPJ3	0.807215	0.160957
ACOC_HUMAN	P21399	-0.342265	0.757107
ACOD_HUMAN	O00767	-3.10189	0.0240635
ACON_HUMAN	Q99798	-0.105547	0.889927
ACOT1_HUMAN	Q86TX2	0.289777	0.693773
ACOT2_HUMAN	P49753	-0.589491	0.795269
ACOT2_HUMAN	P49753	0.403871	0.715817
ACOT8_HUMAN	O14734	0.856314	0.278391
ACOT9_HUMAN	Q9Y305	-0.933327	0.394123
ACOX1_HUMAN	Q15067	-0.0982905	0.903644
ACOX3_HUMAN	O15254	0.970685	0.209307
ACPH_HUMAN	P13798	0.208722	0.832123
ACPM_HUMAN	O14561	-1.18166	0.462394
ACSF3_HUMAN	Q4G176	0.222173	0.79139
ACSF4_HUMAN	Q4L235	0.567618	0.917202
ACSL1_HUMAN	P33121	0.56715	0.5473
ACSL3_HUMAN	O95573	0.799033	0.347532
ACSL4_HUMAN	O60488	-1.82046	0.0518915
ACTB_HUMAN	P60709	-1.06079	0.814141
ACTBL_HUMAN	Q562R1	-0.174011	0.961383
ACTC_HUMAN	P68032	-2.2194	0.244247
ACTG_HUMAN	P63261	-0.258953	0.851023
ACTH_HUMAN	P63267	-4.92166	0.297285
ACTN1_HUMAN	P12814	0.482013	0.747961
ACTN4_HUMAN	O43707	0.908988	0.421169
ACTY_HUMAN	P42025	0.345831	0.765862
ACTZ_HUMAN	P61163	-0.197555	0.860531
ACY1_HUMAN	Q03154	0.553964	0.785248
ACYP1_HUMAN	P07311	0.0473956	0.940665
ADA10_HUMAN	O14672	-0.0668056	0.945447
ADA15_HUMAN	Q13444	-0.112409	0.970103
ADA17_HUMAN	P78536	-0.191372	0.914614
ADAM9_HUMAN	Q13443	-0.00800165	0.986299
ADAS_HUMAN	O00116	0.709291	0.358294
ADCY3_HUMAN	O60266	0.472469	0.648417
ADCY6_HUMAN	O43306	-0.465403	0.797126
ADCY7_HUMAN	P51828	-0.459089	0.772217
ADCY9_HUMAN	O60503	-1.01312	0.621431
ADDA_HUMAN	P35611	-0.449382	0.791013
ADDB_HUMAN	P35612	1.54751	0.336329
ADDG_HUMAN	Q9UEY8	-0.52436	0.888778
ADGB_HUMAN	Q8N7X0	-1.54249	0.682963
ADHX_HUMAN	P11766	1.27226	0.154942
ADK_HUMAN	P55263	0.285309	0.700219
ADNP_HUMAN	Q9H2P0	-0.388516	0.520819
ADPGK_HUMAN	Q9BRR6	-0.23477	0.800486
ADPPT_HUMAN	Q9NRN7	-1.01966	0.456405
ADRM1_HUMAN	Q16186	-0.205451	0.453778
ADRO_HUMAN	P22570	0.291366	0.771686
ADT1_HUMAN	P12235	0.263028	0.771686
ADT2_HUMAN	P05141	-0.169698	0.771686
ADT2_HUMAN	P05141	-0.393388	0.412475
ADT3_HUMAN	P12236	-1.59318	0.0705202
ADX_HUMAN	P10109	0.502486	0.772562
AEDO_HUMAN	Q96SZ5	-0.0992143	0.926648
AF1L2_HUMAN	Q8N4X5	1.86353	0.714056
AF1Q_HUMAN	Q13015	-0.837151	0.278003
AFAD_HUMAN	P55196	0.291366	0.793072
AFAP1_HUMAN	Q8N556	-0.200909	0.658578
AFG32_HUMAN	Q9Y4W6	-0.29654	0.771686
AG10B_HUMAN	Q5I7T1	-0.272706	0.771686
AGAL_HUMAN	P06280	-2.45064	0.389416
AGFG1_HUMAN	P52594	0.774158	0.195246
AGK_HUMAN	Q53H12	-0.204292	0.824598
AGM1_HUMAN	O95394	0.310037	0.698552
AGO2_HUMAN	Q9UKV8	0.994888	0.21998
AGRG1_HUMAN	Q9Y653	-1.19961	0.54302
AGRIN_HUMAN	O00468	1.42658	0.149529
AHNK_HUMAN	Q09666	0.155507	0.899248
AHNK2_HUMAN	Q8IVF2	-0.152112	0.908782
AHSA1_HUMAN	O95433	-0.795617	0.195575
AIDA_HUMAN	Q96BJ3	-0.0417066	0.916354
AIFM1_HUMAN	O95831	0.507464	0.55802
AIFM2_HUMAN	Q9BRQ8	0.0751902	0.965645
AIMP1_HUMAN	Q12904	0.241896	0.185557
AIMP2_HUMAN	Q13155	-0.0369037	0.959934
AINX_HUMAN	Q16352	2.40815	0.15778
AIP_HUMAN	O00170	-0.818161	0.0622416
AK1A1_HUMAN	P14550	0.487487	0.535447
AK1C1_HUMAN	Q04828	2.89179	0.236857
AK1C2_HUMAN	P52895	1.44908	0.44913
AK1C3_HUMAN	P42330	1.63128	0.20507
AK1D1_HUMAN	P51857	1.61931	0.197701
AKA12_HUMAN	Q02952	2.3115	0.0705202
AKAP1_HUMAN	Q92667	0.291366	0.771686
AKAP2_HUMAN	Q9Y2D5	2.34552	0.048653
AKAP8_HUMAN	O43823	0.186166	0.771686
AKAP9_HUMAN	Q99996	-0.599108	0.460709
AKP13_HUMAN	Q12802	0.474878	0.86452
AKP8L_HUMAN	Q9ULX6	0.541741	0.515306
AKT2_HUMAN	P31751	0.291865	0.885766
AKTS1_HUMAN	Q96B36	-1.15446	0.667398
AL1B1_HUMAN	P30837	0.940814	0.143625
AL1L2_HUMAN	Q3SY69	0.345831	0.771686
AL3A1_HUMAN	P30838	0.651974	0.926648
AL3A2_HUMAN	P51648	0.333643	0.702921
AL3B1_HUMAN	P43353	1.35071	0.325237
AL4A1_HUMAN	P30038	0.291366	0.771686
AL7A1_HUMAN	P49419	0.517918	0.365097
AL9A1_HUMAN	P49189	0.00823469	0.991638
ALAT2_HUMAN	Q8TD30	0.291366	0.771686
ALDH2_HUMAN	P05091	0.218557	0.939999
ALDH2_HUMAN	P05091	0.268203	0.928894
ALDOA_HUMAN	P04075	-0.410798	0.330995
ALDOC_HUMAN	P09972	-0.529538	0.554752
ALDR_HUMAN	P15121	0.008229	0.992092
ALG1_HUMAN	Q9BT22	-0.726992	0.480699
ALG13_HUMAN	Q9NP73	-0.940165	0.552264
ALG2_HUMAN	Q9H553	1.76761	0.23817
ALG3_HUMAN	Q92685	0.291366	0.758114
ALG5_HUMAN	Q9Y673	-0.557494	0.721647
ALG9_HUMAN	Q9H6U8	0.345831	0.824598
ALKB5_HUMAN	Q6P6C2	-0.226661	0.967595
ALKB7_HUMAN	Q9BT30	-0.0716933	0.963886
ALR_HUMAN	P55789	0.167268	0.891506
AMACR_HUMAN	Q9UHK6	-0.255966	0.888949
AMD_HUMAN	P19021	0.109803	0.971165
AMFR_HUMAN	Q9UKV5	0.345831	0.774686
AMGO2_HUMAN	Q86SJ2	-0.796817	0.721335
AMPB_HUMAN	Q9H4A4	0.110519	0.870774
AMPD2_HUMAN	Q01433	0.221286	0.965609
AMPL_HUMAN	P28838	0.360689	0.36437
AMPN_HUMAN	P15144	-1.03634	0.503751
AMRP_HUMAN	P30533	-0.0492402	0.981022
AN32A_HUMAN	P39687	0.955362	0.183588
AN32B_HUMAN	Q92688	0.86279	0.0528071
AN32E_HUMAN	Q9BTT0	0.192892	0.79139
ANFY1_HUMAN	Q9P2R3	0.475016	0.791676
ANKH1_HUMAN	Q8IWZ3	1.455	0.477423
ANKL2_HUMAN	Q86XL3	-0.567251	0.667019
ANKZ1_HUMAN	Q9H8Y5	1.66424	0.033901
ANLN_HUMAN	Q9NQW6	0.114651	0.951486
ANM1_HUMAN	Q99873	-0.160294	0.771686
ANM3_HUMAN	O60678	-0.943219	0.729968
ANM5_HUMAN	O14744	-0.277389	0.285093
ANO10_HUMAN	Q9NW15	-0.311727	0.878079
ANO3_HUMAN	Q9BYT9	2.41081	0.283728
ANO6_HUMAN	Q4KMQ2	0.291366	0.822672
ANPRC_HUMAN	P17342	1.15225	0.481337
ANR17_HUMAN	O75179	1.00843	0.670333
ANR28_HUMAN	O15084	0.297937	0.433654
ANTR1_HUMAN	Q9H6X2	1.23832	0.477235
ANX10_HUMAN	Q9UJ72	0.394452	0.771686
ANX11_HUMAN	P50995	1.84226	0.278003
ANX13_HUMAN	P27216	0.437189	0.772764
ANXA1_HUMAN	P04083	1.51401	0.0309122
ANXA2_HUMAN	P07355	0.64016	0.421169
ANXA3_HUMAN	P12429	2.08849	0.0312203
ANXA4_HUMAN	P09525	1.01736	0.314267
ANXA5_HUMAN	P08758	1.52006	0.0371686
ANXA6_HUMAN	P08133	-0.743256	0.221714
ANXA7_HUMAN	P20073	0.979504	0.108518
ANXA8_HUMAN	P13928	3.35367	0.12499
ANXA8_HUMAN	P13928	2.17786	0.148328
AOFA_HUMAN	P21397	0.291366	0.771686
AOFB_HUMAN	P27338	0.291366	0.771686
AP1B1_HUMAN	Q10567	-0.293963	0.339822
AP1G1_HUMAN	O43747	-0.317934	0.550712
AP1M1_HUMAN	Q9BXS5	-0.583787	0.535447
AP1S1_HUMAN	P61966	0.346117	0.86537
AP1S3_HUMAN	Q96PC3	2.28018	0.421454
AP2A1_HUMAN	O95782	0.176078	0.908059
AP2A2_HUMAN	O94973	-0.541328	0.737191
AP2B1_HUMAN	P63010	-0.239501	0.654666
AP2M1_HUMAN	Q96CW1	-0.209607	0.698155
AP2S1_HUMAN	P53680	0.0835595	0.911545
AP3B1_HUMAN	O00203	-0.784398	0.370901
AP3B2_HUMAN	Q13367	0.286559	0.895637
AP3D1_HUMAN	O14617	-0.953677	0.133053
AP3M1_HUMAN	Q9Y2T2	-0.78276	0.105102
AP3S1_HUMAN	Q92572	-0.707131	0.688809
AP4A_HUMAN	P50583	-0.110215	0.877882
AP5S1_HUMAN	Q9NUS5	-1.75447	0.496839
APC1_HUMAN	Q9H1A4	0.0836652	0.959657
APC16_HUMAN	Q96DE5	-1.13849	0.466613
APC5_HUMAN	Q9UJX4	1.02117	0.535447
APC7_HUMAN	Q9UJX3	-0.0690681	0.80715
APEX1_HUMAN	P27695	0.444728	0.412475
APH1A_HUMAN	Q96BI3	-0.0482286	0.971165
API5_HUMAN	Q9BZZ5	0.256967	0.700219
APLP2_HUMAN	Q06481	0.210482	0.890966
APMAP_HUMAN	Q9HDC9	0.254204	0.751131
APOB_HUMAN	P04114	-1.28996	0.422708
APOC3_HUMAN	P02656	-3.36651	0.0365802
APOL2_HUMAN	Q9BQE5	0.657057	0.557057
APOP1_HUMAN	Q96IL0	0.291366	0.771686
APT_HUMAN	P07741	-0.217916	0.881252
APTX_HUMAN	Q7Z2E3	2.21723	0.475849
AQR_HUMAN	O60306	-0.83289	0.0783635
AQR_HUMAN	O60306	-1.62982	0.690562
AR2BP_HUMAN	Q9Y2Y0	0.661295	0.340584
AR6P1_HUMAN	Q15041	0.319804	0.903309
ARAID_HUMAN	Q6UW56	0.305044	0.715904
ARAP1_HUMAN	Q96P48	0.701952	0.477963
ARC1A_HUMAN	Q92747	0.858639	0.0289086
ARC1B_HUMAN	O15143	0.00592775	0.987039
ARCH_HUMAN	Q8IWT0	0.0727794	0.95608
ARF_HUMAN	Q8N726	0.982538	0.777567
ARF1_HUMAN	P84077	-0.218484	0.771686
ARF4_HUMAN	P18085	0.34213	0.749814
ARF5_HUMAN	P84085	-1.15756	0.372771
ARF6_HUMAN	P62330	0.0497257	0.957634
ARFG1_HUMAN	Q8N6T3	-0.398942	0.41173
ARFG2_HUMAN	Q8N6H7	-0.0452047	0.97527
ARFP2_HUMAN	P53365	0.211061	0.85928
ARFRP_HUMAN	Q13795	-0.525345	0.785892
ARGI2_HUMAN	P78540	0.462423	0.737191
ARHG1_HUMAN	Q92888	-0.0086875	0.992767
ARHG2_HUMAN	Q92974	1.81983	0.0365802
ARHG7_HUMAN	Q14155	0.150481	0.917202
ARHGI_HUMAN	Q6ZSZ5	0.0122313	0.981022
ARHL2_HUMAN	Q9NX46	0.870061	0.0977626
ARI1_HUMAN	Q9Y4X5	0.191846	0.912401
ARI1A_HUMAN	O14497	0.619583	0.791004
ARI1A_HUMAN	O14497	1.2767	0.584926
ARI1B_HUMAN	Q8NFD5	-0.0136984	0.994557
ARI2_HUMAN	O95376	0.383463	0.456405
ARID2_HUMAN	Q68CP9	-0.468568	0.740882
ARK72_HUMAN	O43488	-0.179779	0.926648
ARL1_HUMAN	P40616	-0.070075	0.928894
ARL10_HUMAN	Q8N8L6	-0.028528	0.981022
ARL15_HUMAN	Q9NXU5	-1.64695	0.332779
ARL2_HUMAN	P36404	-0.368655	0.559863
ARL3_HUMAN	P36405	0.0456693	0.968624
ARL8A_HUMAN	Q96BM9	-0.26563	0.904618
ARL8B_HUMAN	Q9NVJ2	0.356501	0.808366
ARM10_HUMAN	Q8N2F6	-0.0514059	0.957634
ARMC1_HUMAN	Q9NVT9	0.514586	0.834839
ARMC6_HUMAN	Q6NXE6	-2.00048	0.622128
ARMT1_HUMAN	Q9H993	-0.760079	0.451389
ARMX1_HUMAN	Q9P291	0.671615	0.642386
ARMX2_HUMAN	Q7L311	0.291366	0.779613
ARMX3_HUMAN	Q9UH62	0.0464918	0.971165
AROS_HUMAN	Q86WX3	-1.17818	0.254842
ARP10_HUMAN	Q9NZ32	-0.0100746	0.991638
ARP19_HUMAN	P56211	0.487797	0.824598
ARP2_HUMAN	P61160	1.09398	0.127286
ARP3_HUMAN	P61158	0.821967	0.5473
ARP5L_HUMAN	Q9BPX5	0.715657	0.293762
ARPC2_HUMAN	O15144	0.73291	0.41929
ARPC3_HUMAN	O15145	0.173893	0.907698
ARPC4_HUMAN	P59998	1.00389	0.16483
ARPC5_HUMAN	O15511	0.49982	0.499689
ARPIN_HUMAN	Q7Z6K5	0.426124	0.912103
ASAH1_HUMAN	Q13510	1.62084	0.212163
ASCC2_HUMAN	Q9H1I8	-1.15539	0.393834
ASCC3_HUMAN	Q8N3C0	0.385085	0.863664
ASF1A_HUMAN	Q9Y294	-0.803532	0.783541
ASF1B_HUMAN	Q9NVP2	-1.36689	0.180929
ASHWN_HUMAN	Q9BVC5	0.0834505	0.891044
ASNA_HUMAN	O43681	-0.288557	0.773912
ASNS_HUMAN	P08243	1.95192	0.0216697
ASPG_HUMAN	P20933	-0.669712	0.662325
ASPH_HUMAN	Q12797	0.488322	0.252494
ASPM_HUMAN	Q8IZT6	0.206358	0.918549
ASSY_HUMAN	P00966	5.25688	0.0121683
AT11B_HUMAN	Q9Y2G3	0.306609	0.887877
AT11C_HUMAN	Q8NB49	0.0565362	0.953418
AT131_HUMAN	Q9HD20	0.291366	0.700219
AT133_HUMAN	Q9H7F0	-0.662627	0.745521
AT1A1_HUMAN	P05023	0.219724	0.924154
AT1B1_HUMAN	P05026	0.764749	0.515964
AT1B3_HUMAN	P54709	0.435419	0.388885
AT1B4_HUMAN	Q9UN42	-1.5367	0.731594
AT2A2_HUMAN	P16615	-0.260198	0.877882
AT2A3_HUMAN	Q93084	0.291366	0.771686
AT2B1_HUMAN	P20020	-0.163099	0.904799
AT2B2_HUMAN	Q01814	3.98328	0.16483
AT2B3_HUMAN	Q16720	0.511093	0.692577
AT2B4_HUMAN	P23634	1.02122	0.535447
AT2C1_HUMAN	P98194	-0.341764	0.844021
AT5EL_HUMAN	Q5VTU8	-0.0152967	0.979496
AT5F1_HUMAN	P24539	-0.708186	0.5167
AT5G2_HUMAN	Q06055	0.345831	0.911151
ATAD1_HUMAN	Q8NBU5	0.217087	0.920944
ATAD2_HUMAN	Q6PL18	-1.12789	0.580279
ATD3A_HUMAN	Q9NVI7	0.193864	0.938338
ATD3B_HUMAN	Q5T9A4	0.291366	0.771686
ATD3B_HUMAN	Q5T9A4	0.216543	0.841659
ATF1_HUMAN	P18846	2.61087	0.42384
ATF6A_HUMAN	P18850	-0.0530682	0.949824
ATF6B_HUMAN	Q99941	0.291366	0.771686
ATG3_HUMAN	Q9NT62	0.50196	0.329646
ATG9A_HUMAN	Q7Z3C6	0.264978	0.771686
ATGA1_HUMAN	Q9BSB4	-1.18831	0.638149
ATIF1_HUMAN	Q9UII2	-0.492068	0.655527
ATLA2_HUMAN	Q8NHH9	0.513632	0.829198
ATLA3_HUMAN	Q6DD88	0.531105	0.244801
ATP5H_HUMAN	O75947	-0.837943	0.505835
ATP5I_HUMAN	P56385	-0.0861587	0.934711
ATP5J_HUMAN	P18859	-0.376293	0.54173
ATP5L_HUMAN	O75964	-0.343378	0.578154
ATP5S_HUMAN	Q99766	0.0890105	0.970103
ATP6_HUMAN	P00846	-6.23373	0.0121683
ATP7A_HUMAN	Q04656	-0.942618	0.144967
ATP8_HUMAN	P03928	-0.807089	0.688809
ATP9A_HUMAN	O75110	0.291366	0.740882
ATPA_HUMAN	P25705	0.11207	0.850265
ATPB_HUMAN	P06576	0.0196275	0.979496
ATPD_HUMAN	P30049	-0.0286853	0.981022
ATPF1_HUMAN	Q5TC12	0.157057	0.953127
ATPF2_HUMAN	Q8N5M1	-1.5779	0.085519
ATPG_HUMAN	P36542	0.0455542	0.94476
ATPK_HUMAN	P56134	-0.485579	0.376844
ATPO_HUMAN	P48047	-0.402845	0.77645
ATR_HUMAN	Q13535	1.45039	0.36437
ATRAP_HUMAN	Q6RW13	0.707832	0.464771
ATRX_HUMAN	P46100	0.55119	0.753238
ATX10_HUMAN	Q9UBB4	-0.979145	0.36437
ATX2_HUMAN	Q99700	0.780508	0.503144
ATX2L_HUMAN	Q8WWM7	-0.607592	0.316457
AUHM_HUMAN	Q13825	0.501343	0.568672
AUP1_HUMAN	Q9Y679	0.442288	0.824598
AURKA_HUMAN	O14965	-0.141521	0.772562
AURKB_HUMAN	Q96GD4	0.194512	0.515306
AXA81_HUMAN	Q5VT79	5.22409	0.0190416
B2CL1_HUMAN	Q07817	1.66189	0.48782
B2L11_HUMAN	O43521	0.519814	0.622128
B2L12_HUMAN	Q9HB09	0.432085	0.771686
B2L13_HUMAN	Q9BXK5	0.186343	0.771686
B2MG_HUMAN	P61769	-1.06213	0.238893
B3A2_HUMAN	P04920	-0.718434	0.471012
B3GA3_HUMAN	O94766	0.353445	0.779613
B3GLT_HUMAN	Q6Y288	0.58555	0.183693
B3GT6_HUMAN	Q96L58	-1.12085	0.340584
B4GA1_HUMAN	O43505	0.276105	0.874549
B4GT1_HUMAN	P15291	0.949641	0.133053
B4GT5_HUMAN	O43286	0.0461991	0.984209
B4GT7_HUMAN	Q9UBV7	0.0326934	0.96978
BABA2_HUMAN	Q9NXR7	0.482269	0.327394
BACH_HUMAN	O00154	1.14882	0.0525777
BAD_HUMAN	Q92934	-0.137516	0.973172
BAF_HUMAN	O75531	0.320838	0.496341
BAG1_HUMAN	Q99933	0.516555	0.302989
BAG2_HUMAN	O95816	-0.677523	0.302684
BAG3_HUMAN	O95817	-0.29	0.837982
BAG5_HUMAN	Q9UL15	-1.04008	0.698155
BAG6_HUMAN	P46379	-0.372719	0.449116
BAIP2_HUMAN	Q9UQB8	-0.655676	0.0696375
BAK_HUMAN	Q16611	0.179875	0.844021
BAP18_HUMAN	Q8IXM2	-2.45225	0.340584
BAP29_HUMAN	Q9UHQ4	-0.415325	0.685391
BAP31_HUMAN	P51572	-0.28975	0.771686
BASI_HUMAN	P35613	0.359567	0.616154
BASP1_HUMAN	P80723	0.980586	0.59454
BAX_HUMAN	Q07812	0.65856	0.585162
BAZ1A_HUMAN	Q9NRL2	-0.988597	0.337144
BAZ1B_HUMAN	Q9UIG0	-0.130308	0.893357
BCAM_HUMAN	P50895	3.00116	0.0705202
BCAT1_HUMAN	P54687	3.36362	0.134815
BCAT2_HUMAN	O15382	0.230476	0.885766
BCCIP_HUMAN	Q9P287	-0.227265	0.421053
BCKD_HUMAN	O14874	0.291366	0.771686
BCL2_HUMAN	P10415	-0.987758	0.737884
BCLF1_HUMAN	Q9NYF8	0.179329	0.834425
BCS1_HUMAN	Q9Y276	0.650566	0.477423
BD1L1_HUMAN	Q8NFC6	0.315242	0.515964
BDH_HUMAN	Q02338	-0.502678	0.651239
BDH2_HUMAN	Q9BUT1	-0.188681	0.949824
BET1_HUMAN	O15155	0.362586	0.771686
BET1L_HUMAN	Q9NYM9	0.563924	0.877882
BGAL_HUMAN	P16278	1.30634	0.271841
BGH3_HUMAN	Q15582	-2.69527	0.188881
BI1_HUMAN	P55061	0.21841	0.917202
BI2L1_HUMAN	Q9UHR4	1.07976	0.716358
BICD2_HUMAN	Q8TD16	0.0110057	0.992767
BID_HUMAN	P55957	-0.676013	0.646474
BIEA_HUMAN	P53004	0.699071	0.353855
BIG2_HUMAN	Q9Y6D5	1.35081	0.695692
BIN1_HUMAN	O00499	1.6008	0.389416
BIN3_HUMAN	Q9NQY0	0.14143	0.779613
BIP_HUMAN	P11021	-0.266243	0.635266
BIP_HUMAN	P11021	0.0337447	0.97734
BIRC5_HUMAN	O15392	-0.212852	0.791013
BIRC6_HUMAN	Q9NR09	0.0485665	0.938338
BL1S1_HUMAN	P78537	1.02493	0.550712
BL1S2_HUMAN	Q6QNY1	3.3032	0.455053
BLMH_HUMAN	Q13867	-0.706317	0.777623
BLVRB_HUMAN	P30043	0.629453	0.433766
BMAL2_HUMAN	Q8WYA1	0.462485	0.613052
BMS1_HUMAN	Q14692	-1.44934	0.426843
BNI3L_HUMAN	O60238	0.193012	0.816658
BOLA2_HUMAN	Q9H3K6	-0.200298	0.67072
BOLA3_HUMAN	Q53S33	-1.15687	0.36437
BOP1_HUMAN	Q14137	-0.330809	0.922715
BOREA_HUMAN	Q53HL2	0.40482	0.421169
BORG5_HUMAN	Q00587	1.64469	0.41929
BPHL_HUMAN	Q86WA6	0.547139	0.868895
BPNT1_HUMAN	O95861	0.369322	0.317811
BPTF_HUMAN	Q12830	-0.919361	0.519678
BRAT1_HUMAN	Q6PJG6	0.0260103	0.990445
BRCC3_HUMAN	P46736	0.556903	0.490199
BRD3_HUMAN	Q15059	1.13938	0.36437
BRD4_HUMAN	O60885	0.23905	0.642386
BRD4_HUMAN	O60885	-0.648509	0.783541
BRD8_HUMAN	Q9H0E9	-0.0333227	0.979496
BRE1A_HUMAN	Q5VTR2	-0.49046	0.54173
BRE1B_HUMAN	O75150	-0.192308	0.94476
BRE1B_HUMAN	O75150	-0.55033	0.771686
BRI3B_HUMAN	Q8WY22	0.382237	0.844162
BRK1_HUMAN	Q8WUW1	-1.41507	0.600195
BROX_HUMAN	Q5VW32	0.184089	0.901183
BRX1_HUMAN	Q8TDN6	0.278809	0.511311
BSCL2_HUMAN	Q96G97	0.200549	0.91392
BST2_HUMAN	Q10589	-0.382265	0.794169
BT2A1_HUMAN	Q7KYR7	0.497396	0.820404
BT3L4_HUMAN	Q96K17	1.11074	0.682963
BTAF1_HUMAN	O14981	0.0926762	0.885766
BTF3_HUMAN	P20290	-1.16089	0.131233
BUB1B_HUMAN	O60566	0.21998	0.890976
BUB3_HUMAN	O43684	-0.62147	0.502149
BUD23_HUMAN	O43709	-1.2047	0.256725
BUD31_HUMAN	P41223	-0.442682	0.771686
BYST_HUMAN	Q13895	-2.91217	0.241821
BZW1_HUMAN	Q7L1Q6	1.25497	0.0878052
BZW1_HUMAN	Q7L1Q6	0.516297	0.334107
BZW2_HUMAN	Q9Y6E2	-0.929788	0.0977626
C10_HUMAN	Q99622	-0.779012	0.80342
C19L1_HUMAN	Q69YN2	0.713202	0.246897
C1GLC_HUMAN	Q96EU7	-1.23339	0.31992
C1GLT_HUMAN	Q9NS00	-1.02891	0.447431
C1QBP_HUMAN	Q07021	-0.713023	0.648417
C1TC_HUMAN	P11586	0.061581	0.92058
C1TM_HUMAN	Q6UB35	-0.0277543	0.962026
C2CD5_HUMAN	Q86YS7	1.27811	0.54071
C2D1A_HUMAN	Q6P1N0	-0.133078	0.955198
C2D1B_HUMAN	Q5T0F9	1.68147	0.412475
C42S1_HUMAN	Q9NRR8	0.291366	0.771686
C42S2_HUMAN	Q9NRR3	0.796016	0.706281
C43BP_HUMAN	Q9Y5P4	0.940011	0.605569
C560_HUMAN	Q99643	-1.33727	0.314517
C56D2_HUMAN	O14569	0.369911	0.772562
CA123_HUMAN	Q9NWV4	0.380285	0.588037
CA174_HUMAN	Q8IYL3	0.456462	0.740122
CA2D1_HUMAN	P54289	-1.74947	0.14827
CAB39_HUMAN	Q9Y376	-0.00727475	0.992092
CAB45_HUMAN	Q9BRK5	-2.38373	0.159883
CACP_HUMAN	P43155	0.332733	0.715904
CAD13_HUMAN	P55290	0.925405	0.534954
CADH2_HUMAN	P19022	-0.317058	0.824598
CADM1_HUMAN	Q9BY67	1.05278	0.358713
CAF17_HUMAN	Q5T440	-0.469005	0.79139
CAF1A_HUMAN	Q13111	-1.08169	0.578154
CAF1B_HUMAN	Q13112	-1.91447	0.369031
CAH12_HUMAN	O43570	-0.287643	0.771686
CAH2_HUMAN	P00918	3.07161	0.0639765
CALD1_HUMAN	Q05682	0.364283	0.771686
CALM3_HUMAN	P0DP25	0.632591	0.588256
CALR_HUMAN	P27797	-0.511647	0.206062
CALU_HUMAN	O43852	-0.842859	0.236857
CALX_HUMAN	P27824	0.189279	0.771686
CAMLG_HUMAN	P49069	0.129957	0.948795
CAMP2_HUMAN	Q08AD1	-1.91699	0.198627
CAN1_HUMAN	P07384	0.728491	0.331502
CAN2_HUMAN	P17655	0.497354	0.336928
CANB1_HUMAN	P63098	0.247022	0.900895
CAND1_HUMAN	Q86VP6	0.213803	0.779613
CANT1_HUMAN	Q8WVQ1	-0.177623	0.844245
CAP1_HUMAN	Q01518	0.291883	0.685391
CAP2_HUMAN	P40123	-0.614192	0.828481
CAPG_HUMAN	P40121	3.68122	0.0705202
CAPR1_HUMAN	Q14444	-0.881566	0.371004
CAPZB_HUMAN	P47756	-0.146732	0.885766
CAR19_HUMAN	Q96LW7	-0.115877	0.912401
CARF_HUMAN	Q9NXV6	1.3864	0.228927
CARM1_HUMAN	Q86X55	-0.69643	0.581174
CASC4_HUMAN	Q6P4E1	0.291366	0.708929
CASP_HUMAN	Q13948	0.291366	0.771686
CASP_HUMAN	Q13948	-0.722462	0.78126
CASP3_HUMAN	P42574	0.945924	0.183693
CASP6_HUMAN	P55212	0.893421	0.330995
CASPE_HUMAN	P31944	0.462423	0.927566
CATA_HUMAN	P04040	-0.181129	0.740551
CATB_HUMAN	P07858	3.73766	0.0622416
CATC_HUMAN	P53634	-3.55623	0.0306899
CATD_HUMAN	P07339	0.925102	0.377465
CATL1_HUMAN	P07711	0.120381	0.966291
CATZ_HUMAN	Q9UBR2	-0.606234	0.345614
CAV1_HUMAN	Q03135	0.444526	0.771686
CAV2_HUMAN	P51636	0.457432	0.845073
CAVN1_HUMAN	Q6NZI2	0.261632	0.708909
CAVN2_HUMAN	O95810	2.02665	0.3995
CAVN3_HUMAN	Q969G5	-0.204371	0.777441
CAZA1_HUMAN	P52907	0.739225	0.143625
CAZA2_HUMAN	P47755	-0.223434	0.902766
CAZA2_HUMAN	P47755	0.672124	0.175374
CBPA4_HUMAN	Q9UI42	-2.15897	0.139899
CBPD_HUMAN	O75976	-1.39971	0.177089
CBPM_HUMAN	P14384	1.83981	0.210721
CBR1_HUMAN	P16152	0.0355579	0.963684
CBR3_HUMAN	O75828	0.864628	0.496811
CBR4_HUMAN	Q8N4T8	-0.174492	0.934711
CBS_HUMAN	P35520	0.400372	0.654666
CBX1_HUMAN	P83916	0.262508	0.771686
CBX3_HUMAN	Q13185	-0.974666	0.370901
CBX5_HUMAN	P45973	0.271373	0.821184
CC033_HUMAN	Q6P1S2	0.291366	0.771686
CC115_HUMAN	Q96NT0	-1.28609	0.499689
CC124_HUMAN	Q96CT7	0.0684305	0.957705
CC127_HUMAN	Q96BQ5	0.819842	0.403484
CC134_HUMAN	Q9H6E4	0.0225897	0.987664
CC137_HUMAN	Q6PK04	-3.12186	0.190909
CC148_HUMAN	Q8NFR7	-0.221728	0.824598
CC167_HUMAN	Q9P0B6	-0.602605	0.835246
CC178_HUMAN	Q5BJE1	1.41092	0.624631
CC50A_HUMAN	Q9NV96	-0.360878	0.771686
CC90B_HUMAN	Q9GZT6	0.101903	0.939999
CCAR1_HUMAN	Q8IX12	-0.0487207	0.955198
CCAR2_HUMAN	Q8N163	0.615584	0.431579
CCD12_HUMAN	Q8WUD4	-0.148021	0.862274
CCD22_HUMAN	O60826	0.455516	0.54717
CCD25_HUMAN	Q86WR0	2.24004	0.134771
CCD43_HUMAN	Q96MW1	-0.892324	0.542876
CCD47_HUMAN	Q96A33	-0.386069	0.634493
CCD50_HUMAN	Q8IVM0	0.34768	0.771686
CCD51_HUMAN	Q96ER9	0.0604499	0.957634
CCD58_HUMAN	Q4VC31	0.108974	0.895637
CCD86_HUMAN	Q9H6F5	-0.220949	0.747961
CCD87_HUMAN	Q9NVE4	2.40644	0.699816
CCD93_HUMAN	Q567U6	2.74646	0.15778
CCDC6_HUMAN	Q16204	-0.135879	0.835246
CCHL_HUMAN	P53701	0.445719	0.724181
CCNB1_HUMAN	P14635	0.364711	0.612218
CCNB2_HUMAN	O95067	0.0792086	0.92883
CCNH_HUMAN	P51946	0.415966	0.694223
CCNK_HUMAN	O75909	-0.0647485	0.984209
CCNY_HUMAN	Q8ND76	0.145847	0.955198
CCPG1_HUMAN	Q9ULG6	-1.1279	0.439114
CCS_HUMAN	O14618	0.171943	0.964744
CCZ1_HUMAN	P86791	-0.16899	0.93565
CD003_HUMAN	Q8WVX3	0.151506	0.829198
CD109_HUMAN	Q6YHK3	-0.181305	0.885766
CD11A_HUMAN	Q9UQ88	-0.0199097	0.966472
CD123_HUMAN	O75794	-0.673376	0.0911147
CD151_HUMAN	P48509	0.94268	0.37469
CD166_HUMAN	Q13740	0.147678	0.952074
CD276_HUMAN	Q5ZPR3	0.56604	0.740882
CD2AP_HUMAN	Q9Y5K6	-0.50362	0.515306
CD2B2_HUMAN	O95400	-0.56095	0.839469
CD320_HUMAN	Q9NPF0	-0.91021	0.496341
CD44_HUMAN	P16070	-0.0231664	0.98281
CD47_HUMAN	Q08722	1.54589	0.437015
CD59_HUMAN	P13987	0.408179	0.795248
CD63_HUMAN	P08962	-0.0036251	0.996374
CD68_HUMAN	P34810	-0.420506	0.924654
CD70_HUMAN	P32970	-0.00159642	0.998224
CD81_HUMAN	P60033	0.574784	0.535447
CD9_HUMAN	P21926	3.76193	0.039522
CD97_HUMAN	P48960	0.163306	0.814141
CD99_HUMAN	P14209	0.112256	0.955198
CDC16_HUMAN	Q13042	1.03395	0.496341
CDC23_HUMAN	Q9UJX2	0.809048	0.577884
CDC27_HUMAN	P30260	-0.547412	0.576714
CDC37_HUMAN	Q16543	-0.587433	0.59497
CDC42_HUMAN	P60953	-0.167356	0.874549
CDC5L_HUMAN	Q99459	-1.38257	0.530262
CDC73_HUMAN	Q6P1J9	-0.0501893	0.946821
CDCA2_HUMAN	Q69YH5	0.593597	0.771686
CDCA3_HUMAN	Q99618	1.7232	0.230703
CDCA5_HUMAN	Q96FF9	1.14094	0.437325
CDCP1_HUMAN	Q9H5V8	0.813588	0.550959
CDD_HUMAN	P32320	3.07913	0.314267
CDIPT_HUMAN	O14735	-0.823906	0.290672
CDK1_HUMAN	P06493	0.0859196	0.936433
CDK12_HUMAN	Q9NYV4	-1.0884	0.473225
CDK13_HUMAN	Q14004	0.185223	0.964361
CDK2_HUMAN	P24941	-0.0718736	0.944178
CDK4_HUMAN	P11802	-1.54684	0.105102
CDK5_HUMAN	Q00535	0.625631	0.42666
CDK6_HUMAN	Q00534	-0.0585705	0.987914
CDK7_HUMAN	P50613	-0.0188499	0.980754
CDK9_HUMAN	P50750	0.414885	0.888778
CDKA1_HUMAN	O14519	-1.8364	0.559032
CDKAL_HUMAN	Q5VV42	-0.731001	0.771686
CDN2A_HUMAN	P42771	-0.118379	0.804574
CDS2_HUMAN	O95674	-0.0804338	0.959922
CDV3_HUMAN	Q9UKY7	0.101715	0.863664
CDY1_HUMAN	Q9Y6F8	-0.269063	0.772562
CE022_HUMAN	Q49AR2	-0.415419	0.895637
CE051_HUMAN	A6NDU8	0.527139	0.698552
CE170_HUMAN	Q5SW79	-0.423254	0.851361
CEBOS_HUMAN	A8MTT3	0.788548	0.332921
CEBPB_HUMAN	P17676	0.832032	0.427975
CEBPZ_HUMAN	Q03701	-0.556506	0.37469
CELF1_HUMAN	Q92879	-0.243486	0.771686
CENPB_HUMAN	P07199	-0.54435	0.864094
CENPE_HUMAN	Q02224	-0.0853625	0.981649
CENPF_HUMAN	P49454	0.721598	0.763867
CENPV_HUMAN	Q7Z7K6	0.746401	0.332106
CEP55_HUMAN	Q53EZ4	1.62262	0.584926
CEP97_HUMAN	Q8IW35	0.542176	0.936433
CERS2_HUMAN	Q96G23	-0.725771	0.642733
CETN2_HUMAN	P41208	-0.80602	0.535447
CF120_HUMAN	Q7Z4R8	0.159641	0.957898
CF203_HUMAN	Q9P0P8	0.462423	0.737191
CFA20_HUMAN	Q9Y6A4	-0.0961627	0.958562
CG050_HUMAN	Q9BRJ6	-1.56659	0.0240635
CGAT2_HUMAN	Q8N6G5	0.291366	0.771686
CGBP1_HUMAN	Q9UFW8	-0.206908	0.946848
CGT_HUMAN	Q16880	-0.329149	0.900966
CH033_HUMAN	Q9H7E9	-0.515386	0.909027
CH059_HUMAN	Q8N0T1	0.431477	0.690163
CH082_HUMAN	Q6P1X6	-0.312046	0.90502
CH10_HUMAN	P61604	0.113646	0.92851
CH60_HUMAN	P10809	0.0444003	0.957634
CHAP1_HUMAN	Q96JM3	-0.253629	0.899248
CHC10_HUMAN	Q8WYQ3	2.08666	0.624196
CHCH1_HUMAN	Q96BP2	-0.437772	0.692577
CHCH2_HUMAN	Q9Y6H1	1.83961	0.118133
CHCH5_HUMAN	Q9BSY4	0.598868	0.79139
CHD1_HUMAN	O14646	-0.658058	0.824598
CHD2_HUMAN	O14647	1.25005	0.592557
CHD3_HUMAN	Q12873	1.59951	0.603482
CHD4_HUMAN	Q14839	0.556063	0.806622
CHD7_HUMAN	Q9P2D1	2.61942	0.408497
CHDH_HUMAN	Q8NE62	0.345831	0.955198
CHERP_HUMAN	Q8IWX8	-0.492246	0.747961
CHID1_HUMAN	Q9BWS9	0.0658444	0.980754
CHIP_HUMAN	Q9UNE7	-1.04867	0.0639765
CHM1A_HUMAN	Q9HD42	0.331009	0.908782
CHM2A_HUMAN	O43633	0.60643	0.621431
CHM2B_HUMAN	Q9UQN3	1.82529	0.546644
CHM4A_HUMAN	Q9BY43	-0.77195	0.769848
CHM4B_HUMAN	Q9H444	0.0837748	0.923335
CHMP3_HUMAN	Q9Y3E7	0.195309	0.928894
CHMP5_HUMAN	Q9NZZ3	0.474398	0.492045
CHMP6_HUMAN	Q96FZ7	-0.107774	0.946821
CHMP7_HUMAN	Q8WUX9	0.737442	0.416688
CHP1_HUMAN	Q99653	-0.106502	0.900966
CHPF2_HUMAN	Q9P2E5	-0.640405	0.605591
CHPT1_HUMAN	Q8WUD6	0.173308	0.890878
CHRC1_HUMAN	Q9NRG0	0.831909	0.177997
CHRD1_HUMAN	Q9UHD1	-0.805007	0.572227
CHSP1_HUMAN	Q9Y2V2	-0.248202	0.863664
CHSS1_HUMAN	Q86X52	-0.0747908	0.959061
CHSS2_HUMAN	Q8IZ52	0.0652698	0.961605
CHSS3_HUMAN	Q70JA7	0.00809962	0.991994
CHSS3_HUMAN	Q70JA7	0.291366	0.771686
CHST3_HUMAN	Q7LGC8	-0.784128	0.717003
CHSTB_HUMAN	Q9NPF2	-1.4546	0.675443
CHSTE_HUMAN	Q8NCH0	0.0160976	0.990923
CHTOP_HUMAN	Q9Y3Y2	0.532201	0.623237
CHUR_HUMAN	Q8WUH1	0.925015	0.167712
CI114_HUMAN	Q5T280	-0.197879	0.952719
CIA30_HUMAN	Q9Y375	-0.84168	0.416688
CIAO1_HUMAN	O76071	0.189084	0.823655
CIKS_HUMAN	O43734	2.40287	0.771686
CIP4_HUMAN	Q15642	-0.0302004	0.979165
CIRBP_HUMAN	Q14011	-1.28153	0.282273
CISD1_HUMAN	Q9NZ45	0.231835	0.77645
CISD2_HUMAN	Q8N5K1	0.681277	0.365097
CISD3_HUMAN	P0C7P0	0.125305	0.857823
CISY_HUMAN	O75390	-0.2996	0.486787
CK054_HUMAN	Q9H0W9	0.566968	0.667398
CK068_HUMAN	Q9H3H3	0.321301	0.634298
CK098_HUMAN	E9PRG8	0.62106	0.389416
CK5P1_HUMAN	Q96SZ6	0.286762	0.778044
CK5P3_HUMAN	Q96JB5	-0.608666	0.274845
CKAP2_HUMAN	Q8WWK9	0.552915	0.715817
CKAP4_HUMAN	Q07065	-0.466417	0.588256
CKAP5_HUMAN	Q14008	0.708818	0.771686
CKLF6_HUMAN	Q9NX76	-0.200614	0.93124
CKS1_HUMAN	P61024	1.57569	0.5691
CKS2_HUMAN	P33552	0.400812	0.731594
CL043_HUMAN	Q96C57	-0.810743	0.715904
CLAP1_HUMAN	Q7Z460	1.11194	0.389416
CLAP2_HUMAN	O75122	0.807708	0.685391
CLAP2_HUMAN	O75122	1.39981	0.577343
CLCA_HUMAN	P09496	-0.524712	0.515964
CLCB_HUMAN	P09497	0.213574	0.952719
CLCC1_HUMAN	Q96S66	-0.322716	0.879609
CLD1_HUMAN	O95832	0.275309	0.685391
CLD4_HUMAN	O14493	0.577692	0.885766
CLDN1_HUMAN	Q9NY35	0.228209	0.942651
CLGN_HUMAN	O14967	0.892102	0.486787
CLH1_HUMAN	Q00610	-0.44343	0.435322
CLH2_HUMAN	P53675	-0.879285	0.495421
CLIC1_HUMAN	O00299	0.297265	0.5167
CLIC3_HUMAN	O95833	1.01917	0.620003
CLIC4_HUMAN	Q9Y696	0.304063	0.822672
CLIP1_HUMAN	P30622	0.252059	0.685391
CLMN_HUMAN	Q96JQ2	2.82788	0.141664
CLMP_HUMAN	Q9H6B4	0.0658444	0.955198
CLN6_HUMAN	Q9NWW5	0.330472	0.810644
CLP1L_HUMAN	Q96KA5	-0.252778	0.771686
CLPB_HUMAN	Q9H078	0.374983	0.615161
CLPP_HUMAN	Q16740	-1.43881	0.192579
CLPT1_HUMAN	O96005	0.587036	0.513243
CLPX_HUMAN	O76031	-1.21999	0.358055
CLU_HUMAN	O75153	-0.549605	0.627615
CLUS_HUMAN	P10909	-0.0381502	0.990923
CMBL_HUMAN	Q96DG6	-0.281045	0.44105
CMC1_HUMAN	O75746	-0.684952	0.340584
CMC2_HUMAN	Q9UJS0	-0.644286	0.300858
CMS1_HUMAN	Q9BQ75	-0.621181	0.373802
CMTD1_HUMAN	Q86VU5	-1.09023	0.443175
CMYA5_HUMAN	Q8N3K9	-0.137221	0.871773
CN37_HUMAN	P09543	-0.808758	0.186451
CNBP_HUMAN	P62633	-0.271311	0.810189
CND1_HUMAN	Q15021	0.0581245	0.964361
CND2_HUMAN	Q15003	-0.309645	0.889142
CND3_HUMAN	Q9BPX3	-0.101182	0.877882
CNDD3_HUMAN	P42695	-1.71008	0.330995
CNDG2_HUMAN	Q86XI2	-1.014	0.817538
CNDH2_HUMAN	Q6IBW4	-2.6042	0.340584
CNDP2_HUMAN	Q96KP4	-0.320979	0.688809
CNIH1_HUMAN	O95406	-0.18252	0.946821
CNIH4_HUMAN	Q9P003	0.081708	0.991479
CNN1_HUMAN	P51911	-3.21701	0.0752486
CNN2_HUMAN	Q99439	-0.839079	0.133317
CNN3_HUMAN	Q15417	-0.652943	0.329646
CNNM3_HUMAN	Q8NE01	0.275697	0.733128
CNNM4_HUMAN	Q6P4Q7	-0.653055	0.826527
CNO10_HUMAN	Q9H9A5	-0.809446	0.327394
CNOT1_HUMAN	A5YKK6	0.814231	0.690562
CNOT2_HUMAN	Q9NZN8	-0.425664	0.907698
CNOT7_HUMAN	Q9UIV1	0.374987	0.165699
CNOT9_HUMAN	Q92600	-0.112019	0.936372
CNPY2_HUMAN	Q9Y2B0	0.30253	0.597442
CNPY3_HUMAN	Q9BT09	1.22819	0.249981
CNPY4_HUMAN	Q8N129	-0.458351	0.821082
CNST_HUMAN	Q6PJW8	-0.421467	0.92764
CNTLN_HUMAN	Q9NXG0	4.52277	0.0878052
CNTP1_HUMAN	P78357	0.125686	0.864612
CNTP3_HUMAN	Q9BZ76	0.177267	0.959061
CO040_HUMAN	Q8WUR7	0.524436	0.749498
CO061_HUMAN	A6NNL5	0.345831	0.824598
CO1A1_HUMAN	P02452	-1.39305	0.345614
CO3_HUMAN	P01024	-1.14087	0.426517
CO3A1_HUMAN	P02461	0.291366	0.771686
CO4A1_HUMAN	P02462	-0.0572247	0.961605
CO4A2_HUMAN	P08572	0.316807	0.6159
CO4A4_HUMAN	P53420	0.841784	0.634493
CO5A1_HUMAN	P20908	-0.56338	0.690562
CO6A1_HUMAN	P12109	-2.29094	0.14827
CO7A1_HUMAN	Q02388	0.856636	0.455053
COA1_HUMAN	Q9GZY4	-0.376888	0.656793
COA3_HUMAN	Q9Y2R0	-0.10947	0.824598
COA4_HUMAN	Q9NYJ1	-0.343965	0.895637
COA6_HUMAN	Q5JTJ3	-0.58212	0.416688
COA7_HUMAN	Q96BR5	0.309234	0.722735
COASY_HUMAN	Q13057	0.345551	0.552264
COCA1_HUMAN	Q99715	-1.02427	0.388797
COF1_HUMAN	P23528	0.185099	0.816658
COF2_HUMAN	Q9Y281	0.110882	0.927566
COG4_HUMAN	Q9H9E3	-1.31844	0.596261
COG5_HUMAN	Q9UP83	-1.39662	0.578124
COG6_HUMAN	Q9Y2V7	-1.44949	0.685391
COIA1_HUMAN	P39060	-1.26904	0.313015
COIL_HUMAN	P38432	0.989129	0.717585
COMD1_HUMAN	Q8N668	-0.146529	0.891721
COMD2_HUMAN	Q86X83	0.145979	0.902611
COMD3_HUMAN	Q9UBI1	-0.576914	0.703983
COMD4_HUMAN	Q9H0A8	0.211026	0.81866
COMD5_HUMAN	Q9GZQ3	0.739938	0.583925
COMD6_HUMAN	Q7Z4G1	-0.242474	0.891044
COMD7_HUMAN	Q86VX2	0.0214811	0.971198
COMD8_HUMAN	Q9NX08	-0.154628	0.917202
COMD9_HUMAN	Q9P000	-1.58004	0.495981
COMDA_HUMAN	Q9Y6G5	0.187129	0.667019
COMT_HUMAN	P21964	-1.06556	0.252494
COPA_HUMAN	P53621	-0.509146	0.3947
COPB_HUMAN	P53618	-0.313739	0.360951
COPB2_HUMAN	P35606	-0.743187	0.195575
COPD_HUMAN	P48444	-0.227816	0.627741
COPE_HUMAN	O14579	-0.0477739	0.924654
COPG1_HUMAN	Q9Y678	-0.946089	0.606915
COPG2_HUMAN	Q9UBF2	-2.01748	0.0365802
COPZ1_HUMAN	P61923	-0.0920499	0.881252
COQ3_HUMAN	Q9NZJ6	-0.478657	0.642386
COQ4_HUMAN	Q9Y3A0	0.345831	0.824598
COQ5_HUMAN	Q5HYK3	0.304988	0.80895
COQ6_HUMAN	Q9Y2Z9	0.238583	0.926648
COQ7_HUMAN	Q99807	0.291366	0.771686
COQ8A_HUMAN	Q8NI60	-0.380525	0.745521
COQ8B_HUMAN	Q96D53	0.291366	0.771686
COQ9_HUMAN	O75208	-0.318882	0.871773
COR1B_HUMAN	Q9BR76	-0.416935	0.715904
COR1C_HUMAN	Q9ULV4	-0.164908	0.874549
COR2A_HUMAN	Q92828	2.00282	0.127062
COTL1_HUMAN	Q14019	-0.0661435	0.950121
COX1_HUMAN	P00395	0.291366	0.771686
COX10_HUMAN	Q12887	-0.0220327	0.98597
COX11_HUMAN	Q9Y6N1	-0.246141	0.871773
COX14_HUMAN	Q96I36	0.475627	0.824598
COX15_HUMAN	Q7KZN9	0.271479	0.781356
COX16_HUMAN	Q9P0S2	-0.0885674	0.964361
COX17_HUMAN	Q14061	-0.0456021	0.979656
COX18_HUMAN	Q8N8Q8	-0.253676	0.877882
COX19_HUMAN	Q49B96	-0.0852934	0.927566
COX2_HUMAN	P00403	-3.62895	0.0547465
COX20_HUMAN	Q5RI15	-0.0988252	0.927566
COX3_HUMAN	P00414	0.291366	0.771686
COX41_HUMAN	P13073	-0.00606753	0.994557
COX5A_HUMAN	P20674	0.0627396	0.941562
COX5B_HUMAN	P10606	-1.30699	0.240851
COX6C_HUMAN	P09669	-0.787099	0.514352
COX7R_HUMAN	O14548	-1.57139	0.334107
COXM1_HUMAN	Q7Z7K0	-0.125742	0.899543
COXM2_HUMAN	Q9NRP2	-0.642812	0.771686
CP062_HUMAN	Q7Z3J2	1.4311	0.587518
CP1B1_HUMAN	Q16678	0.462423	0.737191
CP20A_HUMAN	Q6UW02	1.93766	0.347532
CP2B6_HUMAN	P20813	-2.36683	0.771686
CP2S1_HUMAN	Q96SQ9	2.49852	0.0293695
CP51A_HUMAN	Q16850	-0.237136	0.715904
CPIN1_HUMAN	Q6FI81	-0.234001	0.699816
CPNE1_HUMAN	Q99829	0.136056	0.785892
CPNE3_HUMAN	O75131	1.02574	0.0878052
CPNE8_HUMAN	Q86YQ8	-1.22093	0.439114
CPNE9_HUMAN	Q8IYJ1	1.45311	0.238893
CPNS1_HUMAN	P04632	0.360609	0.547225
CPPED_HUMAN	Q9BRF8	0.736857	0.230703
CPSF1_HUMAN	Q10570	0.390731	0.704268
CPSF2_HUMAN	Q9P2I0	-1.09144	0.667019
CPSF3_HUMAN	Q9UKF6	-0.245516	0.731594
CPSF4_HUMAN	O95639	-0.166248	0.963886
CPSF5_HUMAN	O43809	-0.366181	0.512306
CPSF6_HUMAN	Q16630	-0.370443	0.681721
CPSF7_HUMAN	Q8N684	-0.842825	0.791013
CPSM_HUMAN	P31327	1.9257	0.274845
CPT1A_HUMAN	P50416	0.637909	0.360951
CPT2_HUMAN	P23786	0.306534	0.638408
CQ062_HUMAN	Q9BQA9	-0.599671	0.5167
CRBG1_HUMAN	Q9Y4K1	0.345831	0.824598
CREB1_HUMAN	P16220	0.970939	0.572743
CREG1_HUMAN	O75629	-3.64984	0.226357
CRIM1_HUMAN	Q9NZV1	-0.496907	0.820262
CRIP1_HUMAN	P50238	5.31375	0.151868
CRIP2_HUMAN	P52943	-0.440954	0.665136
CRK_HUMAN	P46108	0.0246417	0.965872
CRKL_HUMAN	P46109	0.127491	0.854752
CRNL1_HUMAN	Q9BZJ0	0.54243	0.771686
CRNN_HUMAN	Q9UBG3	-2.02011	0.665136
CROCC_HUMAN	Q5TZA2	1.09333	0.242069
CRTAP_HUMAN	O75718	-0.54587	0.406875
CRTP1_HUMAN	A8MQ03	0.197136	0.910875
CRYAB_HUMAN	P02511	0.548022	0.453778
CS025_HUMAN	Q9UFG5	0.414221	0.632021
CSDE1_HUMAN	O75534	-0.988406	0.0240635
CSK_HUMAN	P41240	-0.51431	0.737191
CSK21_HUMAN	P68400	0.075406	0.909973
CSK22_HUMAN	P19784	0.203858	0.771686
CSK2B_HUMAN	P67870	0.206617	0.877882
CSKP_HUMAN	O14936	-0.0204458	0.988134
CSMT1_HUMAN	Q4G0I0	0.00342304	0.994844
CSN1_HUMAN	Q13098	0.78414	0.673825
CSN2_HUMAN	P61201	-0.0962903	0.864603
CSN3_HUMAN	Q9UNS2	0.101508	0.771686
CSN4_HUMAN	Q9BT78	0.353901	0.404833
CSN5_HUMAN	Q92905	0.940986	0.134771
CSN6_HUMAN	Q7L5N1	0.584497	0.47601
CSN7A_HUMAN	Q9UBW8	0.932057	0.219071
CSN7B_HUMAN	Q9H9Q2	-0.0775128	0.953127
CSN8_HUMAN	Q99627	-0.728094	0.511615
CSPG4_HUMAN	Q6UVK1	0.982776	0.51842
CSRP1_HUMAN	P21291	0.774347	0.3947
CSRP2_HUMAN	Q16527	0.894683	0.376844
CSTF1_HUMAN	Q05048	-0.185605	0.771686
CSTF2_HUMAN	P33240	0.363337	0.751263
CSTF3_HUMAN	Q12996	0.075691	0.981511
CSTFT_HUMAN	Q9H0L4	1.12916	0.706221
CSTN1_HUMAN	O94985	0.462423	0.737191
CT027_HUMAN	Q9GZN8	-0.309763	0.690562
CTBL1_HUMAN	Q8WYA6	-0.445103	0.5473
CTBP1_HUMAN	Q13363	0.936016	0.383099
CTBP2_HUMAN	P56545	-0.263054	0.915662
CTBP2_HUMAN	P56545	0.12085	0.897566
CTCF_HUMAN	P49711	-1.81752	0.457918
CTDS1_HUMAN	Q9GZU7	0.652337	0.534954
CTF18_HUMAN	Q8WVB6	1.68021	0.505396
CTGE5_HUMAN	O15320	-0.0465907	0.936854
CTGF_HUMAN	P29279	1.91949	0.255403
CTL1_HUMAN	Q8WWI5	0.291366	0.740882
CTL2_HUMAN	Q8IWA5	1.62489	0.564506
CTNA1_HUMAN	P35221	-1.02478	0.610538
CTNA2_HUMAN	P26232	-1.44787	0.771686
CTNB1_HUMAN	P35222	-1.07078	0.372075
CTND1_HUMAN	O60716	-0.354333	0.837512
CTR1_HUMAN	P30825	0.437283	0.795105
CTR9_HUMAN	Q6PD62	-0.080869	0.90502
CTRO_HUMAN	O14578	0.285572	0.855593
CUL1_HUMAN	Q13616	-0.333531	0.769198
CUL2_HUMAN	Q13617	-0.128227	0.690562
CUL3_HUMAN	Q13618	0.606638	0.515306
CUL4A_HUMAN	Q13619	0.483422	0.177997
CUL4B_HUMAN	Q13620	0.198283	0.868101
CUL5_HUMAN	Q93034	-1.49453	0.608249
CUTA_HUMAN	O60888	0.196443	0.596528
CUTC_HUMAN	Q9NTM9	0.643943	0.141435
CUX1_HUMAN	P39880	-0.904692	0.547861
CWC15_HUMAN	Q9P013	-0.063423	0.955198
CWC22_HUMAN	Q9HCG8	-0.180846	0.79139
CWC27_HUMAN	Q6UX04	-2.33139	0.125414
CX056_HUMAN	Q9H5V9	-0.4457	0.31554
CX6A1_HUMAN	P12074	-1.35646	0.772217
CX6B1_HUMAN	P14854	-0.6239	0.612953
CX7A2_HUMAN	P14406	-2.68124	0.36437
CXA1_HUMAN	P17302	-1.42607	0.415924
CXAR_HUMAN	P78310	-0.341329	0.623237
CXCR4_HUMAN	P61073	0.291366	0.715904
CY1_HUMAN	P08574	0.612544	0.534954
CYB_HUMAN	P00156	-1.87622	0.242245
CYB5_HUMAN	P00167	-0.164156	0.8414
CYB5B_HUMAN	O43169	-0.0707801	0.967016
CYBP_HUMAN	Q9HB71	-0.457632	0.54173
CYC_HUMAN	P99999	0.13878	0.927566
CYFP1_HUMAN	Q7L576	-0.207206	0.803907
CYFP2_HUMAN	Q96F07	0.482445	0.912103
CYR61_HUMAN	O00622	1.21145	0.618179
CYTB_HUMAN	P04080	0.849046	0.139209
CYTM1_HUMAN	Q9H1C7	0.603104	0.514908
CYTSA_HUMAN	Q69YQ0	0.779699	0.297285
CYTSB_HUMAN	Q5M775	0.105894	0.859555
D19L1_HUMAN	Q2PZI1	0.23358	0.825571
D39U1_HUMAN	Q9NRG7	-0.269355	0.851025
DAAF5_HUMAN	Q86Y56	-1.42248	0.0190416
DAAM1_HUMAN	Q9Y4D1	-0.0220257	0.981022
DAB2_HUMAN	P98082	0.921021	0.437015
DAD1_HUMAN	P61803	-0.311448	0.660687
DAF_HUMAN	P08174	0.466808	0.790951
DAG1_HUMAN	Q14118	0.291943	0.890104
DAPK1_HUMAN	P53355	1.58344	0.16483
DAPK3_HUMAN	O43293	0.398322	0.891056
DAXX_HUMAN	Q9UER7	2.68087	0.247946
DAZP1_HUMAN	Q96EP5	0.21275	0.866421
DBLOH_HUMAN	Q9NR28	-0.0625399	0.959061
DBNL_HUMAN	Q9UJU6	0.0550771	0.981713
DBR1_HUMAN	Q9UK59	-0.309472	0.822672
DC1I2_HUMAN	Q13409	0.538751	0.515964
DC1L1_HUMAN	Q9Y6G9	0.186687	0.689716
DC1L2_HUMAN	O43237	2.07274	0.489599
DCA13_HUMAN	Q9NV06	-2.33865	0.365859
DCAF1_HUMAN	Q9Y4B6	-0.537575	0.3849
DCAF7_HUMAN	P61962	-0.176196	0.957426
DCAKD_HUMAN	Q8WVC6	-0.141384	0.924154
DCBD1_HUMAN	Q8N8Z6	0.291366	0.808366
DCBD2_HUMAN	Q96PD2	-1.58947	0.340584
DCD_HUMAN	P81605	-0.493838	0.907698
DCK_HUMAN	P27707	-1.02292	0.329646
DCMC_HUMAN	O95822	0.291366	0.771686
DCNL1_HUMAN	Q96GG9	-0.408861	0.486102
DCNL5_HUMAN	Q9BTE7	-0.0887224	0.817936
DCPS_HUMAN	Q96C86	0.741867	0.261402
DCTD_HUMAN	P32321	1.45978	0.419704
DCTN1_HUMAN	Q14203	-0.108426	0.952074
DCTN2_HUMAN	Q13561	0.279767	0.670834
DCTN3_HUMAN	O75935	-0.258746	0.740122
DCTN4_HUMAN	Q9UJW0	-0.313331	0.728611
DCTN5_HUMAN	Q9BTE1	0.551691	0.867009
DCTN6_HUMAN	O00399	-0.435877	0.833305
DCTP1_HUMAN	Q9H773	-0.966931	0.566
DCUP_HUMAN	P06132	1.30607	0.0760856
DCXR_HUMAN	Q7Z4W1	-0.174053	0.771686
DD19A_HUMAN	Q9NUU7	-0.166134	0.924154
DDA1_HUMAN	Q9BW61	0.512377	0.433764
DDAH1_HUMAN	O94760	0.822604	0.496839
DDAH1_HUMAN	O94760	-0.84396	0.823655
DDAH2_HUMAN	O95865	1.56634	0.456282
DDB1_HUMAN	Q16531	0.230904	0.699816
DDB2_HUMAN	Q92466	0.722009	0.535447
DDRGK_HUMAN	Q96HY6	-0.0898452	0.953127
DDX1_HUMAN	Q92499	0.68927	0.327255
DDX10_HUMAN	Q13206	-1.03852	0.127992
DDX17_HUMAN	Q92841	-0.0633153	0.929821
DDX18_HUMAN	Q9NVP1	-0.308194	0.771686
DDX20_HUMAN	Q9UHI6	0.0962473	0.959061
DDX21_HUMAN	Q9NR30	-1.65347	0.133238
DDX23_HUMAN	Q9BUQ8	-0.483575	0.701012
DDX24_HUMAN	Q9GZR7	-1.18412	0.341895
DDX27_HUMAN	Q96GQ7	-1.88885	0.475849
DDX28_HUMAN	Q9NUL7	-0.121031	0.948795
DDX31_HUMAN	Q9H8H2	0.118012	0.909423
DDX3X_HUMAN	O00571	-0.628914	0.176093
DDX3X_HUMAN	O00571	-0.271735	0.772562
DDX3Y_HUMAN	O15523	0.180145	0.898605
DDX41_HUMAN	Q9UJV9	-0.956862	0.747961
DDX42_HUMAN	Q86XP3	-0.228822	0.763867
DDX46_HUMAN	Q7L014	0.589994	0.588256
DDX47_HUMAN	Q9H0S4	-0.189974	0.810522
DDX49_HUMAN	Q9Y6V7	-1.02891	0.622128
DDX5_HUMAN	P17844	-0.649994	0.456282
DDX50_HUMAN	Q9BQ39	-0.778283	0.731594
DDX51_HUMAN	Q8N8A6	-1.85037	0.5167
DDX52_HUMAN	Q9Y2R4	-3.1195	0.0216697
DDX54_HUMAN	Q8TDD1	-0.28191	0.635342
DDX55_HUMAN	Q8NHQ9	-1.31719	0.682445
DDX56_HUMAN	Q9NY93	-1.81196	0.0884454
DDX58_HUMAN	O95786	2.42945	0.271242
DDX6_HUMAN	P26196	0.211069	0.639692
DECR_HUMAN	Q16698	0.564673	0.669445
DECR2_HUMAN	Q9NUI1	-0.152785	0.832123
DEFM_HUMAN	Q9HBH1	-0.870146	0.421454
DEGS1_HUMAN	O15121	-0.381406	0.634207
DEK_HUMAN	P35659	0.28479	0.600826
DEN4C_HUMAN	Q5VZ89	1.22459	0.49611
DENR_HUMAN	O43583	0.111567	0.777441
DEOC_HUMAN	Q9Y315	0.430053	0.621431
DERL1_HUMAN	Q9BUN8	0.0620945	0.955198
DERL2_HUMAN	Q9GZP9	-0.958013	0.430712
DESI2_HUMAN	Q9BSY9	-1.91535	0.450641
DESP_HUMAN	P15924	0.601796	0.830955
DEST_HUMAN	P60981	0.216669	0.888778
DFFA_HUMAN	O00273	0.6268	0.177168
DGAT1_HUMAN	O75907	0.291366	0.771686
DGKA_HUMAN	P23743	2.42023	0.388797
DGKE_HUMAN	P52429	-0.282347	0.86452
DGLB_HUMAN	Q8NCG7	-1.57173	0.203048
DGUOK_HUMAN	Q16854	0.483836	0.771686
DHB11_HUMAN	Q8NBQ5	0.96908	0.299156
DHB12_HUMAN	Q53GQ0	-0.432951	0.439457
DHB4_HUMAN	P51659	0.352189	0.462242
DHB7_HUMAN	P56937	-1.12849	0.208968
DHB8_HUMAN	Q92506	-0.312745	0.833457
DHC24_HUMAN	Q15392	-0.112207	0.929821
DHCR7_HUMAN	Q9UBM7	-1.4257	0.16483
DHDDS_HUMAN	Q86SQ9	-0.423677	0.572227
DHE3_HUMAN	P00367	0.0338171	0.963684
DHPR_HUMAN	P09417	0.161335	0.771686
DHRS1_HUMAN	Q96LJ7	1.23315	0.241821
DHRS2_HUMAN	Q13268	-1.52669	0.284287
DHRS4_HUMAN	Q9BTZ2	0.585302	0.488463
DHRS7_HUMAN	Q9Y394	0.253274	0.817459
DHSD_HUMAN	O14521	-0.217157	0.877882
DHSO_HUMAN	Q00796	-0.720087	0.305681
DHTK1_HUMAN	Q96HY7	0.291366	0.771686
DHX15_HUMAN	O43143	0.095591	0.824598
DHX16_HUMAN	O60231	-0.765089	0.5167
DHX29_HUMAN	Q7Z478	0.264205	0.885766
DHX30_HUMAN	Q7L2E3	0.354414	0.499689
DHX36_HUMAN	Q9H2U1	-0.681141	0.452903
DHX37_HUMAN	Q8IY37	-1.17507	0.222806
DHX57_HUMAN	Q6P158	1.02643	0.735608
DHX8_HUMAN	Q14562	-0.852578	0.341895
DHX9_HUMAN	Q08211	-0.193038	0.835518
DHYS_HUMAN	P49366	-3.07416	0.125414
DIA1_HUMAN	Q8NDZ4	0.291366	0.745521
DIAP1_HUMAN	O60610	0.79004	0.376844
DIAP2_HUMAN	O60879	-2.19365	0.396651
DIAP3_HUMAN	Q9NSV4	0.0306254	0.981022
DIC_HUMAN	Q9UBX3	-0.546667	0.496341
DIDO1_HUMAN	Q9BTC0	1.21459	0.53865
DIEXF_HUMAN	Q68CQ4	-1.22136	0.258268
DIM1_HUMAN	Q9UNQ2	-0.292952	0.513095
DIP2B_HUMAN	Q9P265	-0.859228	0.709972
DJB11_HUMAN	Q9UBS4	-0.210159	0.731594
DJB12_HUMAN	Q9NXW2	-0.185413	0.771686
DJB14_HUMAN	Q8TBM8	-1.3597	0.563921
DJC10_HUMAN	Q8IXB1	0.585498	0.600195
DJC11_HUMAN	Q9NVH1	0.124229	0.895637
DJC13_HUMAN	O75165	0.313829	0.886085
DJC14_HUMAN	Q6Y2X3	-0.57856	0.67504
DJC15_HUMAN	Q9Y5T4	0.62437	0.453948
DJC16_HUMAN	Q9Y2G8	0.433185	0.857391
DJC21_HUMAN	Q5F1R6	-0.483917	0.212163
DJC30_HUMAN	Q96LL9	-0.385699	0.829198
DKC1_HUMAN	O60832	0.0096038	0.992092
DLDH_HUMAN	P09622	-0.2848	0.384693
DLG1_HUMAN	Q12959	0.404352	0.563921
DLP1_HUMAN	Q86YH6	-0.329438	0.797487
DLRB1_HUMAN	Q9NP97	0.273593	0.764249
DMAC1_HUMAN	Q96GE9	-0.175993	0.938338
DMAC2_HUMAN	Q9NW81	-0.0151734	0.985058
DMAP1_HUMAN	Q9NPF5	0.246193	0.808366
DMD_HUMAN	P11532	-0.959375	0.769848
DNA2_HUMAN	P51530	1.0129	0.771686
DNJA1_HUMAN	P31689	-0.337497	0.453862
DNJA2_HUMAN	O60884	-0.364324	0.783541
DNJA3_HUMAN	Q96EY1	0.266567	0.740882
DNJB1_HUMAN	P25685	0.204097	0.55802
DNJB4_HUMAN	Q9UDY4	0.153572	0.928894
DNJC1_HUMAN	Q96KC8	0.0994972	0.950121
DNJC2_HUMAN	Q99543	-1.18931	0.667398
DNJC3_HUMAN	Q13217	0.422897	0.686457
DNJC5_HUMAN	Q9H3Z4	0.118883	0.958103
DNJC7_HUMAN	Q99615	-0.279471	0.44913
DNJC8_HUMAN	O75937	-0.433302	0.81689
DNJC9_HUMAN	Q8WXX5	1.0142	0.210993
DNLI1_HUMAN	P18858	0.73144	0.682963
DNLI3_HUMAN	P49916	-0.651054	0.269509
DNLI4_HUMAN	P49917	0.323723	0.893357
DNLZ_HUMAN	Q5SXM8	0.898698	0.426517
DNM1L_HUMAN	O00429	0.0462691	0.957898
DNMBP_HUMAN	Q6XZF7	0.341257	0.888949
DNMT1_HUMAN	P26358	-1.32671	0.187412
DNPEP_HUMAN	Q9ULA0	1.57304	0.747485
DNPH1_HUMAN	O43598	0.370566	0.685391
DNS2A_HUMAN	O00115	-0.232808	0.940665
DNSL1_HUMAN	P49184	0.291366	0.874549
DOC10_HUMAN	Q96BY6	0.599158	0.885611
DOC11_HUMAN	Q5JSL3	-1.24031	0.517741
DOCK1_HUMAN	Q14185	-1.70615	0.744842
DOCK5_HUMAN	Q9H7D0	0.713395	0.274603
DOCK7_HUMAN	Q96N67	1.15324	0.552365
DOCK9_HUMAN	Q9BZ29	0.345831	0.824598
DOHH_HUMAN	Q9BU89	-0.995147	0.294913
DOLK_HUMAN	Q9UPQ8	0.230173	0.832495
DOPD_HUMAN	P30046	0.604841	0.389416
DP13A_HUMAN	Q9UKG1	1.25816	0.683217
DPCD_HUMAN	Q9BVM2	0.843295	0.771686
DPH5_HUMAN	Q9H2P9	0.620494	0.785248
DPM1_HUMAN	O60762	-0.0648792	0.944179
DPM3_HUMAN	Q9P2X0	0.238593	0.806762
DPOA2_HUMAN	Q14181	0.494529	0.772217
DPOD1_HUMAN	P28340	1.113	0.422708
DPOD2_HUMAN	P49005	-0.559462	0.777878
DPOD3_HUMAN	Q15054	1.20785	0.571636
DPOE1_HUMAN	Q07864	0.959283	0.824598
DPOE3_HUMAN	Q9NRF9	0.710741	0.280125
DPOE4_HUMAN	Q9NR33	1.67059	0.271841
DPOG1_HUMAN	P54098	0.291366	0.771686
DPOG2_HUMAN	Q9UHN1	-0.326177	0.771686
DPOLA_HUMAN	P09884	-0.167663	0.859555
DPP2_HUMAN	Q9UHL4	0.893905	0.505835
DPP3_HUMAN	Q9NY33	0.0411666	0.971165
DPP8_HUMAN	Q6V1X1	-1.80676	0.657055
DPP9_HUMAN	Q86TI2	-1.79809	0.421454
DPY30_HUMAN	Q9C005	0.917727	0.637559
DPYL1_HUMAN	Q14194	3.73065	0.0190416
DPYL2_HUMAN	Q16555	0.686748	0.3947
DPYL3_HUMAN	Q14195	-0.058419	0.931656
DREB_HUMAN	Q16643	0.042954	0.943839
DRG1_HUMAN	Q9Y295	0.647713	0.104552
DRG2_HUMAN	P55039	-0.142748	0.903201
DRS7B_HUMAN	Q6IAN0	-0.145246	0.893725
DSCR3_HUMAN	O14972	0.376163	0.771686
DSE_HUMAN	Q9UL01	0.134298	0.888678
DSEL_HUMAN	Q8IZU8	0.0427751	0.976667
DSG2_HUMAN	Q14126	0.393126	0.708929
DSRAD_HUMAN	P55265	-0.17715	0.745521
DTD1_HUMAN	Q8TEA8	-0.221818	0.920944
DUS12_HUMAN	Q9UNI6	0.445664	0.374244
DUS23_HUMAN	Q9BVJ7	0.682206	0.515306
DUS3_HUMAN	P51452	1.11107	0.486787
DUS3L_HUMAN	Q96G46	0.983447	0.746241
DUT_HUMAN	P33316	0.374033	0.642386
DX39A_HUMAN	O00148	0.138694	0.912103
DX39A_HUMAN	O00148	0.0291526	0.981511
DX39B_HUMAN	Q13838	-0.257917	0.799995
DYH2_HUMAN	Q9P225	0.484314	0.953972
DYHC1_HUMAN	Q14204	0.0407375	0.957634
DYHC2_HUMAN	Q8NCM8	-1.01272	0.657886
DYL1_HUMAN	P63167	0.223768	0.896548
DYL2_HUMAN	Q96FJ2	-1.93708	0.660081
DYLT1_HUMAN	P63172	0.824039	0.213632
DYN2_HUMAN	P50570	-0.431767	0.79139
DYR_HUMAN	P00374	0.729322	0.678649
DYST_HUMAN	Q03001	-0.634167	0.440765
E2AK2_HUMAN	P19525	0.751146	0.230039
E2AK4_HUMAN	Q9P2K8	0.223385	0.927566
E41L1_HUMAN	Q9H4G0	2.26965	0.340584
E41L2_HUMAN	O43491	-0.331624	0.847077
EAA1_HUMAN	P43003	-0.30072	0.894676
EAF6_HUMAN	Q9HAF1	-0.579411	0.771686
EBP_HUMAN	Q15125	-0.497743	0.635266
EBP2_HUMAN	Q99848	0.960555	0.0357834
ECD_HUMAN	O95905	0.490935	0.904102
ECE1_HUMAN	P42892	-0.149581	0.793865
ECH1_HUMAN	Q13011	0.840871	0.515964
ECHA_HUMAN	P40939	0.552781	0.312125
ECHB_HUMAN	P55084	0.544616	0.737884
ECHD1_HUMAN	Q9NTX5	-0.746946	0.675926
ECHD3_HUMAN	Q96DC8	1.07684	0.673303
ECHM_HUMAN	P30084	-0.343379	0.620003
ECI1_HUMAN	P42126	0.529192	0.535447
ECI2_HUMAN	O75521	0.546142	0.496341
ECM29_HUMAN	Q5VYK3	0.852252	0.0705202
ECSIT_HUMAN	Q9BQ95	0.291366	0.771686
EDC3_HUMAN	Q96F86	-0.271109	0.892526
EDC4_HUMAN	Q6P2E9	0.164505	0.831982
EDEM3_HUMAN	Q9BZQ6	-1.69424	0.358055
EDF1_HUMAN	O60869	0.232191	0.750435
EDIL3_HUMAN	O43854	0.753096	0.517813
EDRF1_HUMAN	Q3B7T1	-0.903672	0.437015
EEA1_HUMAN	Q15075	-0.330481	0.663849
EF1A1_HUMAN	P68104	-0.673303	0.225013
EF1A2_HUMAN	Q05639	-5.43054	0.0190416
EF1B_HUMAN	P24534	0.195514	0.729096
EF1D_HUMAN	P29692	-0.572082	0.358055
EF1G_HUMAN	P26641	-0.382531	0.654398
EF2_HUMAN	P13639	-1.39269	0.101982
EFCB1_HUMAN	Q9HAE3	2.06747	0.327255
EFCB6_HUMAN	Q5THR3	0.653488	0.923335
EFGM_HUMAN	Q96RP9	-0.01747	0.981022
EFHD2_HUMAN	Q96C19	0.683629	0.340584
EFL1_HUMAN	Q7Z2Z2	0.265851	0.688809
EFR3A_HUMAN	Q14156	0.373836	0.926648
EFTS_HUMAN	P43897	-0.352328	0.600195
EFTU_HUMAN	P49411	-0.246061	0.810355
EGFR_HUMAN	P00533	-0.855307	0.357292
EGLN_HUMAN	P17813	-1.52278	0.115285
EH1L1_HUMAN	Q8N3D4	-0.318355	0.933789
EHD1_HUMAN	Q9H4M9	0.187548	0.737884
EHD2_HUMAN	Q9NZN4	-0.420954	0.646859
EHD4_HUMAN	Q9H223	0.531455	0.49611
EHMT2_HUMAN	Q96KQ7	0.192281	0.963684
EI24_HUMAN	O14681	-1.40438	0.623471
EI2BA_HUMAN	Q14232	0.113851	0.831444
EI2BB_HUMAN	P49770	-0.19043	0.704095
EI2BD_HUMAN	Q9UI10	0.990272	0.458318
EI2BE_HUMAN	Q13144	-0.198832	0.818504
EI2BG_HUMAN	Q9NR50	0.467075	0.36437
EIF1_HUMAN	P41567	-0.633335	0.278003
EIF1B_HUMAN	O60739	1.11709	0.0878052
EIF2A_HUMAN	Q9BY44	-0.150102	0.625285
EIF2D_HUMAN	P41214	0.515854	0.453134
EIF3A_HUMAN	Q14152	-0.759517	0.203048
EIF3B_HUMAN	P55884	-1.06381	0.10478
EIF3C_HUMAN	Q99613	-0.504911	0.358713
EIF3D_HUMAN	O15371	-0.0969287	0.947202
EIF3E_HUMAN	P60228	-0.355654	0.368749
EIF3F_HUMAN	O00303	-0.495272	0.27876
EIF3G_HUMAN	O75821	-0.543032	0.242245
EIF3H_HUMAN	O15372	-0.214953	0.862761
EIF3I_HUMAN	Q13347	-0.265724	0.755844
EIF3J_HUMAN	O75822	-0.233431	0.678649
EIF3K_HUMAN	Q9UBQ5	-0.784103	0.431579
EIF3L_HUMAN	Q9Y262	-0.390217	0.422708
EIF3M_HUMAN	Q7L2H7	-0.478184	0.439436
ELAV1_HUMAN	Q15717	-0.322499	0.45786
ELMD2_HUMAN	Q8IZ81	0.413368	0.667398
ELMO2_HUMAN	Q96JJ3	1.04646	0.486102
ELOA1_HUMAN	Q14241	0.237759	0.890188
ELOB_HUMAN	Q15370	0.489452	0.626269
ELOC_HUMAN	Q15369	0.535492	0.415924
ELOV1_HUMAN	Q9BW60	-0.772022	0.455053
ELOV2_HUMAN	Q9NXB9	-1.19915	0.373214
ELOV5_HUMAN	Q9NYP7	-1.10555	0.278003
ELP1_HUMAN	O95163	0.409144	0.542876
ELP2_HUMAN	Q6IA86	-1.69045	0.201722
ELYS_HUMAN	Q8WYP5	0.758591	0.677974
EMAL4_HUMAN	Q9HC35	-0.569645	0.699816
EMB_HUMAN	Q6PCB8	0.305871	0.923335
EMC1_HUMAN	Q8N766	0.131343	0.772562
EMC10_HUMAN	Q5UCC4	-0.300468	0.861412
EMC2_HUMAN	Q15006	0.648318	0.210721
EMC3_HUMAN	Q9P0I2	0.757739	0.374244
EMC4_HUMAN	Q5J8M3	0.50612	0.79139
EMC6_HUMAN	Q9BV81	-0.615757	0.685391
EMC7_HUMAN	Q9NPA0	0.11816	0.797487
EMC8_HUMAN	O43402	-0.0784478	0.9702
EMC9_HUMAN	Q9Y3B6	-0.593765	0.624605
EMD_HUMAN	P50402	0.942927	0.340584
EMRE_HUMAN	Q9H4I9	0.714489	0.771686
ENAH_HUMAN	Q8N8S7	-0.6707	0.108518
ENOA_HUMAN	P06733	0.482309	0.166478
ENOB_HUMAN	P13929	2.05045	0.316457
ENOG_HUMAN	P09104	1.74921	0.701715
ENOPH_HUMAN	Q9UHY7	0.397558	0.717622
ENPL_HUMAN	P14625	-0.752415	0.648417
ENPP1_HUMAN	P22413	1.4093	0.667019
ENSA_HUMAN	O43768	-0.187614	0.79139
ENY2_HUMAN	Q9NPA8	-0.90727	0.605945
EP300_HUMAN	Q09472	1.04675	0.667019
EP400_HUMAN	Q96L91	-1.13794	0.456282
EPCR_HUMAN	Q9UNN8	-1.97169	0.0240635
EPDR1_HUMAN	Q9UM22	-1.15807	0.412867
EPG5_HUMAN	Q9HCE0	1.38458	0.657209
EPHA2_HUMAN	P29317	1.33564	0.329646
EPHA3_HUMAN	P29320	-1.98185	0.27824
EPHA3_HUMAN	P29320	-2.47977	0.0357834
EPHA7_HUMAN	Q15375	-0.771292	0.661758
EPHA7_HUMAN	Q15375	0.462423	0.737191
EPHB2_HUMAN	P29323	-1.52187	0.320474
EPHB4_HUMAN	P54760	-0.275321	0.731594
EPIPL_HUMAN	P58107	0.917499	0.327394
EPMIP_HUMAN	Q7L775	-1.00098	0.588211
EPN1_HUMAN	Q9Y6I3	-1.50153	0.628538
EPN2_HUMAN	O95208	-0.564823	0.863664
EPN4_HUMAN	Q14677	-0.153918	0.71639
EPS15_HUMAN	P42566	0.546685	0.393834
EPS8_HUMAN	Q12929	-2.42023	0.431001
EPT1_HUMAN	Q9C0D9	0.00467582	0.992767
ERAL1_HUMAN	O75616	-0.490353	0.55802
ERAP1_HUMAN	Q9NZ08	1.79871	0.0439984
ERBB2_HUMAN	P04626	-1.18622	0.515964
ERBIN_HUMAN	Q96RT1	-0.303349	0.771686
ERC2_HUMAN	O15083	1.22076	0.720362
ERCC2_HUMAN	P18074	0.157604	0.531363
ERCC3_HUMAN	P19447	0.0549938	0.960059
ERCC5_HUMAN	P28715	-0.991456	0.552264
ERD21_HUMAN	P24390	0.186931	0.874858
ERD22_HUMAN	P33947	-1.10146	0.835246
ERD23_HUMAN	O43731	-1.27519	0.772562
ERF1_HUMAN	P62495	-0.0116619	0.986961
ERF3A_HUMAN	P15170	-0.316888	0.575414
ERF3B_HUMAN	Q8IYD1	0.0393729	0.974497
ERG1_HUMAN	Q14534	0.152435	0.881252
ERG28_HUMAN	Q9UKR5	0.628358	0.824598
ERG7_HUMAN	P48449	-1.72842	0.151868
ERGI1_HUMAN	Q969X5	0.783559	0.0945431
ERGI2_HUMAN	Q96RQ1	1.58533	0.231604
ERGI3_HUMAN	Q9Y282	0.817009	0.54173
ERH_HUMAN	P84090	-0.171033	0.771686
ERI1_HUMAN	Q8IV48	1.62243	0.15778
ERI3_HUMAN	O43414	0.447503	0.810189
ERLEC_HUMAN	Q96DZ1	-0.0177246	0.987914
ERLN1_HUMAN	O75477	0.00351214	0.994014
ERLN1_HUMAN	O75477	0.337017	0.461667
ERLN2_HUMAN	O94905	0.558698	0.243807
ERMP1_HUMAN	Q7Z2K6	0.291366	0.767872
ERO1A_HUMAN	Q96HE7	-0.121527	0.912401
ERP29_HUMAN	P30040	0.345058	0.803907
ERP44_HUMAN	Q9BS26	0.863872	0.0878052
ES1_HUMAN	P30042	0.269377	0.700696
ES8L2_HUMAN	Q9H6S3	1.41507	0.667019
ESTD_HUMAN	P10768	0.0149184	0.981022
ESYT1_HUMAN	Q9BSJ8	0.0916734	0.953889
ESYT2_HUMAN	A0FGR8	-0.238332	0.762732
ETFA_HUMAN	P13804	-0.755748	0.16086
ETFB_HUMAN	P38117	-0.679186	0.685361
ETFD_HUMAN	Q16134	-0.341226	0.764499
ETHE1_HUMAN	O95571	1.08524	0.169174
EVPL_HUMAN	Q92817	-0.786596	0.750981
EWS_HUMAN	Q01844	0.217545	0.80246
EXD2_HUMAN	Q9NVH0	0.291366	0.771686
EXOC1_HUMAN	Q9NV70	-0.0955742	0.97734
EXOC2_HUMAN	Q96KP1	0.368509	0.839469
EXOC3_HUMAN	O60645	0.0195312	0.979661
EXOC4_HUMAN	Q96A65	-0.122485	0.816238
EXOC5_HUMAN	O00471	-0.368152	0.924307
EXOG_HUMAN	Q9Y2C4	0.264066	0.785962
EXOS1_HUMAN	Q9Y3B2	-0.402195	0.535447
EXOS2_HUMAN	Q13868	0.00881024	0.981022
EXOS3_HUMAN	Q9NQT5	0.117398	0.808618
EXOS4_HUMAN	Q9NPD3	-0.055899	0.953972
EXOS5_HUMAN	Q9NQT4	-0.575813	0.412475
EXOS6_HUMAN	Q5RKV6	-0.797	0.381267
EXOS7_HUMAN	Q15024	-0.0296091	0.97294
EXOS8_HUMAN	Q96B26	-0.448241	0.643787
EXOS9_HUMAN	Q06265	-0.317466	0.801498
EXOSX_HUMAN	Q01780	-0.430704	0.740882
EXT1_HUMAN	Q16394	1.50371	0.608078
EXT2_HUMAN	Q93063	0.291366	0.797913
EXTL2_HUMAN	Q9UBQ6	-0.135341	0.885766
EZRI_HUMAN	P15311	1.42071	0.0878052
F105A_HUMAN	Q9NUU6	-0.673883	0.762732
F107B_HUMAN	Q9H098	1.24971	0.575603
F10A1_HUMAN	P50502	-0.200142	0.791013
F1142_HUMAN	Q9NRY5	-0.326859	0.955198
F120A_HUMAN	Q9NZB2	0.966254	0.209307
F136A_HUMAN	Q96C01	0.431489	0.426993
F162A_HUMAN	Q96A26	-1.59344	0.352892
F173A_HUMAN	Q9BQD7	-0.282936	0.877882
F173B_HUMAN	Q6P4H8	0.140135	0.885766
F177A_HUMAN	Q8N128	0.708361	0.416782
F192A_HUMAN	Q9GZU8	-2.09266	0.329646
F207A_HUMAN	Q9NSI2	-1.79398	0.286246
F210A_HUMAN	Q96ND0	0.311852	0.771686
F210B_HUMAN	Q96KR6	-0.349512	0.759465
F213A_HUMAN	Q9BRX8	0.470223	0.785892
F234A_HUMAN	Q9H0X4	-0.8632	0.708929
F241A_HUMAN	Q8N8J7	0.275512	0.881578
F8I2_HUMAN	P23610	-1.16543	0.781356
F91A1_HUMAN	Q658Y4	-0.170523	0.959922
FA156_HUMAN	Q8NDB6	-1.33606	0.797487
FA49B_HUMAN	Q9NUQ9	0.725623	0.203048
FA50A_HUMAN	Q14320	0.221014	0.642386
FA83H_HUMAN	Q6ZRV2	-0.737623	0.861412
FA96A_HUMAN	Q9H5X1	0.820905	0.583925
FA98A_HUMAN	Q8NCA5	-0.253347	0.618179
FA98B_HUMAN	Q52LJ0	0.513885	0.219071
FA98B_HUMAN	Q52LJ0	1.05967	0.421169
FAAA_HUMAN	P16930	-0.632661	0.217769
FABD_HUMAN	Q8IVS2	0.310369	0.699816
FABP5_HUMAN	Q01469	-0.507633	0.906512
FACD2_HUMAN	Q9BXW9	0.623858	0.515482
FACE1_HUMAN	O75844	0.0235457	0.979502
FACE2_HUMAN	Q9Y256	-1.00715	0.181778
FACR1_HUMAN	Q8WVX9	-1.20703	0.162415
FAD1_HUMAN	Q8NFF5	-1.10719	0.624196
FADD_HUMAN	Q13158	0.383664	0.918374
FADS1_HUMAN	O60427	-0.283862	0.771686
FADS2_HUMAN	O95864	-1.19632	0.363588
FADS3_HUMAN	Q9Y5Q0	-0.678421	0.67504
FAF1_HUMAN	Q9UNN5	-0.731339	0.649329
FAF2_HUMAN	Q96CS3	0.318364	0.564506
FAH2A_HUMAN	Q96GK7	0.369061	0.563921
FAHD1_HUMAN	Q6P587	-0.943266	0.286246
FAK1_HUMAN	Q05397	2.12752	0.0553206
FAKD1_HUMAN	Q53R41	0.291366	0.771686
FAKD2_HUMAN	Q9NYY8	0.177641	0.87304
FAKD3_HUMAN	Q14CZ7	0.14324	0.88007
FAKD4_HUMAN	Q969Z0	-1.21917	0.147476
FAKD5_HUMAN	Q7L8L6	0.115807	0.79139
FAM3A_HUMAN	P98173	-0.676185	0.689742
FAM3C_HUMAN	Q92520	-0.344025	0.747648
FANCI_HUMAN	Q9NVI1	0.487097	0.618616
FARP1_HUMAN	Q9Y4F1	0.192367	0.92058
FAS_HUMAN	P49327	-0.131823	0.9661
FAT1_HUMAN	Q14517	-0.66018	0.534954
FAT4_HUMAN	Q6V0I7	-0.838775	0.53417
FBLL1_HUMAN	A6NHQ2	0.0693152	0.908059
FBLN1_HUMAN	P23142	-0.226133	0.961605
FBLN3_HUMAN	Q12805	0.973671	0.428051
FBN1_HUMAN	P35555	-0.128846	0.920366
FBN2_HUMAN	P35556	0.0658444	0.955198
FBRL_HUMAN	P22087	0.0605461	0.867167
FBX22_HUMAN	Q8NEZ5	0.0168787	0.981022
FCF1_HUMAN	Q9Y324	-1.05673	0.393834
FCL_HUMAN	Q13630	0.670766	0.388885
FDFT_HUMAN	P37268	-1.46766	0.115285
FDX2_HUMAN	Q6P4F2	-0.663145	0.657657
FEN1_HUMAN	P39748	0.265227	0.427975
FERM2_HUMAN	Q96AC1	-0.268477	0.738996
FGF2_HUMAN	P09038	0.646111	0.642386
FGOP2_HUMAN	Q9NVK5	-0.0839673	0.963454
FHL1_HUMAN	Q13642	0.0162449	0.992092
FHL2_HUMAN	Q14192	0.556331	0.740962
FHL3_HUMAN	Q13643	1.04799	0.588211
FHOD1_HUMAN	Q9Y613	0.586294	0.831491
FIBP_HUMAN	O43427	-0.402368	0.850265
FINC_HUMAN	P02751	0.866872	0.771686
FIP1_HUMAN	Q6UN15	0.067168	0.923745
FIS1_HUMAN	Q9Y3D6	-0.214719	0.838679
FITM2_HUMAN	Q8N6M3	0.825263	0.87304
FKB10_HUMAN	Q96AY3	-0.701196	0.169174
FKB11_HUMAN	Q9NYL4	-0.739114	0.514908
FKB14_HUMAN	Q9NWM8	-2.22048	0.439114
FKB15_HUMAN	Q5T1M5	0.773863	0.490893
FKB1A_HUMAN	P62942	0.562808	0.568754
FKBP2_HUMAN	P26885	1.05023	0.142989
FKBP3_HUMAN	Q00688	-0.143058	0.826143
FKBP4_HUMAN	Q02790	0.733569	0.251846
FKBP7_HUMAN	Q9Y680	1.24466	0.17382
FKBP8_HUMAN	Q14318	0.318347	0.654666
FKBP9_HUMAN	O95302	0.333402	0.692304
FKRP_HUMAN	Q9H9S5	-1.07532	0.382129
FL2D_HUMAN	Q15007	-0.00933833	0.996374
FLII_HUMAN	Q13045	-0.273859	0.775782
FLNA_HUMAN	P21333	2.39181	0.337144
FLNB_HUMAN	O75369	3.35568	0.190909
FLNC_HUMAN	Q14315	0.491283	0.821184
FLOT1_HUMAN	O75955	-0.077463	0.949207
FLOT2_HUMAN	Q14254	-0.116708	0.921143
FMC1_HUMAN	Q96HJ9	-1.30608	0.771686
FMNL1_HUMAN	O95466	2.45414	0.134815
FMNL2_HUMAN	Q96PY5	0.659115	0.329646
FMR1_HUMAN	Q06787	-0.291841	0.835246
FMT_HUMAN	Q96DP5	1.26916	0.5167
FNBP4_HUMAN	Q8N3X1	0.0273085	0.98281
FND3A_HUMAN	Q9Y2H6	0.0235334	0.989213
FND3B_HUMAN	Q53EP0	-0.856611	0.439114
FOCAD_HUMAN	Q5VW36	-0.637884	0.278003
FOLC_HUMAN	Q05932	0.298889	0.717003
FOLR1_HUMAN	P15328	3.10392	0.0190416
FOXK1_HUMAN	P85037	-0.195592	0.771686
FPPS_HUMAN	P14324	-0.276039	0.640081
FPRP_HUMAN	Q9P2B2	-0.555155	0.685391
FR1L4_HUMAN	A9Z1Z3	0.561101	0.660697
FRAS1_HUMAN	Q86XX4	0.0335857	0.976667
FRDA_HUMAN	Q16595	-0.111379	0.957634
FRG1_HUMAN	Q14331	0.0788141	0.881252
FRIH_HUMAN	P02794	-0.32313	0.881578
FRIL_HUMAN	P02792	0.124892	0.951633
FRYL_HUMAN	O94915	1.31462	0.489878
FSCN1_HUMAN	Q16658	-0.132896	0.861412
FTO_HUMAN	Q9C0B1	-0.989323	0.246405
FUBP1_HUMAN	Q96AE4	0.0564117	0.953972
FUBP2_HUMAN	Q92945	-0.791938	0.153038
FUBP2_HUMAN	Q92945	-1.09044	0.771686
FUBP3_HUMAN	Q96I24	-0.10282	0.926648
FUCT1_HUMAN	Q96A29	-0.456416	0.888778
FUMH_HUMAN	P07954	-0.302052	0.659987
FUND1_HUMAN	Q8IVP5	0.291366	0.771686
FUND2_HUMAN	Q9BWH2	-0.868009	0.447741
FUS_HUMAN	P35637	-0.262312	0.808618
FUS_HUMAN	P35637	0.0592395	0.981022
FUT8_HUMAN	Q9BYC5	0.0265716	0.976667
FWCH2_HUMAN	Q96CP2	1.60684	0.0240635
FXL18_HUMAN	Q96ME1	-0.363283	0.865826
FXL20_HUMAN	Q96IG2	-0.689051	0.791811
FXR1_HUMAN	P51114	-0.936592	0.427975
FXR1_HUMAN	P51114	-1.14047	0.36437
FXR2_HUMAN	P51116	-0.720691	0.139106
FXRD1_HUMAN	Q96CU9	0.291366	0.771686
FYCO1_HUMAN	Q9BQS8	-0.329111	0.872955
G3BP1_HUMAN	Q13283	-0.387205	0.393834
G3BP2_HUMAN	Q9UN86	-0.397423	0.275847
G3P_HUMAN	P04406	0.452812	0.471897
G45IP_HUMAN	Q8TAE8	-1.73583	0.20507
G6PC3_HUMAN	Q9BUM1	1.21116	0.406838
G6PD_HUMAN	P11413	0.0280489	0.981511
G6PI_HUMAN	P06744	0.449951	0.215665
GABPA_HUMAN	Q06546	-0.716476	0.771686
GALE_HUMAN	Q14376	0.81765	0.340584
GALK1_HUMAN	P51570	2.04171	0.382697
GALT1_HUMAN	Q10472	-0.219512	0.834839
GALT2_HUMAN	Q10471	-0.282265	0.859555
GALT3_HUMAN	Q14435	0.291366	0.771686
GALT4_HUMAN	Q8N4A0	0.345831	0.824598
GALT7_HUMAN	Q86SF2	-0.414157	0.671703
GAMT_HUMAN	Q14353	0.621071	0.771686
GANAB_HUMAN	Q14697	0.257498	0.491594
GAPD1_HUMAN	Q14C86	1.06797	0.0705202
GAPR1_HUMAN	Q9H4G4	0.382655	0.791004
GAR1_HUMAN	Q9NY12	0.167824	0.820501
GARS_HUMAN	P41250	0.401346	0.5167
GATA_HUMAN	Q9H0R6	0.538205	0.806115
GATB_HUMAN	O75879	0.811009	0.515155
GATC_HUMAN	O43716	0.777086	0.515964
GATM_HUMAN	P50440	2.95817	0.698125
GBB1_HUMAN	P62873	0.555487	0.533283
GBB2_HUMAN	P62879	-0.379609	0.52558
GBB4_HUMAN	Q9HAV0	-0.475146	0.619928
GBF1_HUMAN	Q92538	-0.0877168	0.920944
GBG12_HUMAN	Q9UBI6	0.0437159	0.957705
GBG2_HUMAN	P59768	2.3079	0.152
GBG5_HUMAN	P63218	-0.141618	0.944858
GBP1_HUMAN	P32455	1.27757	0.289271
GBRL2_HUMAN	P60520	-2.48091	0.0945431
GCC2_HUMAN	Q8IWJ2	0.670475	0.771686
GCDH_HUMAN	Q92947	-0.141038	0.874858
GCN1_HUMAN	Q92616	0.967901	0.693773
GCP2_HUMAN	Q9BSJ2	-0.822737	0.486787
GCP3_HUMAN	Q96CW5	-0.0950034	0.967239
GCP4_HUMAN	Q9UGJ1	-2.8564	0.261402
GCP60_HUMAN	Q9H3P7	-0.154379	0.552365
GCR_HUMAN	P04150	0.45392	0.5167
GCSH_HUMAN	P23434	0.97508	0.667398
GDAP1_HUMAN	Q8TB36	0.291366	0.771686
GDC_HUMAN	P16260	0.462423	0.737191
GDE_HUMAN	P35573	-0.309359	0.771686
GDE1_HUMAN	Q9NZC3	-0.277969	0.839469
GDIA_HUMAN	P31150	0.875169	0.252494
GDIB_HUMAN	P50395	0.120411	0.885766
GDIR1_HUMAN	P52565	-0.648496	0.538898
GDN_HUMAN	P07093	0.729856	0.578154
GDPD1_HUMAN	Q8N9F7	1.31813	0.496811
GDS1_HUMAN	P52306	0.0953649	0.922715
GEMI2_HUMAN	O14893	1.06867	0.389416
GEMI4_HUMAN	P57678	-0.277962	0.535447
GEMI5_HUMAN	Q8TEQ6	-0.434198	0.535447
GEMI6_HUMAN	Q8WXD5	0.0908445	0.963684
GEMI7_HUMAN	Q9H840	-0.109822	0.881277
GEPH_HUMAN	Q9NQX3	-1.90919	0.566
GET4_HUMAN	Q7L5D6	-0.358112	0.492823
GFPT1_HUMAN	Q06210	0.857126	0.220739
GGCT_HUMAN	O75223	0.142224	0.946706
GGH_HUMAN	Q92820	0.384881	0.834839
GGT1_HUMAN	P19440	1.62838	0.316457
GGT7_HUMAN	Q9UJ14	0.0427492	0.990923
GGYF2_HUMAN	Q6Y7W6	-0.708261	0.152
GHC1_HUMAN	Q9H936	-0.406142	0.613052
GHDC_HUMAN	Q8N2G8	0.408326	0.69272
GHITM_HUMAN	Q9H3K2	0.559017	0.53417
GID8_HUMAN	Q9NWU2	-1.04249	0.456405
GILT_HUMAN	P13284	-1.35696	0.667019
GIPC1_HUMAN	O14908	-0.0738886	0.874858
GIT1_HUMAN	Q9Y2X7	-0.679475	0.845829
GL1AD_HUMAN	Q6EEV4	0.0207666	0.994014
GL8D1_HUMAN	Q68CQ7	0.1057	0.946706
GL8D2_HUMAN	Q9H1C3	-0.213813	0.899543
GLCE_HUMAN	O94923	0.291366	0.733128
GLCM_HUMAN	P04062	0.91167	0.619282
GLCNE_HUMAN	Q9Y223	0.38867	0.383337
GLE1_HUMAN	Q53GS7	0.161715	0.720459
GLGB_HUMAN	Q04446	0.550842	0.0896306
GLIP1_HUMAN	P48060	0.342298	0.899543
GLMN_HUMAN	Q92990	0.803473	0.210074
GLMP_HUMAN	Q8WWB7	-1.40362	0.610405
GLNA_HUMAN	P15104	-0.179124	0.971707
GLO2_HUMAN	Q16775	-0.0544961	0.961222
GLOD4_HUMAN	Q9HC38	-0.0143724	0.979496
GLP3L_HUMAN	Q9H4A5	0.792067	0.820441
GLPK_HUMAN	P32189	0.291366	0.771686
GLRX1_HUMAN	P35754	0.540592	0.566
GLRX3_HUMAN	O76003	-0.179827	0.822672
GLRX5_HUMAN	Q86SX6	-0.160135	0.900327
GLSK_HUMAN	O94925	-0.102013	0.950121
GLT10_HUMAN	Q86SR1	0.505866	0.615476
GLU2B_HUMAN	P14314	0.0407912	0.936963
GLUCM_HUMAN	Q7Z3D6	1.09881	0.657934
GLYC_HUMAN	P34896	1.35701	0.771686
GLYG_HUMAN	P46976	-0.491878	0.824598
GLYM_HUMAN	P34897	0.616243	0.241821
GLYR1_HUMAN	Q49A26	-0.167527	0.934711
GMFB_HUMAN	P60983	0.0644011	0.908782
GMPPA_HUMAN	Q96IJ6	0.0495053	0.921068
GMPPB_HUMAN	Q9Y5P6	1.12746	0.731594
GNA1_HUMAN	Q96EK6	0.193593	0.904995
GNA11_HUMAN	P29992	0.115343	0.824598
GNA13_HUMAN	Q14344	-0.525234	0.75722
GNAI1_HUMAN	P63096	-0.40997	0.36437
GNAI2_HUMAN	P04899	0.180673	0.800486
GNAI3_HUMAN	P08754	0.581121	0.439718
GNAQ_HUMAN	P50148	0.630996	0.868835
GNAS2_HUMAN	P63092	0.387713	0.559032
GNAZ_HUMAN	P19086	0.985955	0.892965
GNL1_HUMAN	P36915	-0.208208	0.85449
GNL3_HUMAN	Q9BVP2	0.0773325	0.927566
GNL3L_HUMAN	Q9NVN8	0.565683	0.67566
GNPAT_HUMAN	O15228	0.369891	0.822672
GNPI1_HUMAN	P46926	0.965906	0.15778
GNPI2_HUMAN	Q8TDQ7	0.185622	0.902317
GNPTA_HUMAN	Q3T906	0.123663	0.957634
GNS_HUMAN	P15586	-0.884532	0.327255
GOGA1_HUMAN	Q92805	0.0658444	0.955198
GOGA2_HUMAN	Q08379	0.21896	0.740962
GOGA3_HUMAN	Q08378	-0.404476	0.550712
GOGA4_HUMAN	Q13439	0.106143	0.950289
GOGA5_HUMAN	Q8TBA6	0.291366	0.771686
GOGA7_HUMAN	Q7Z5G4	0.334228	0.771686
GOGB1_HUMAN	Q14789	-0.178362	0.838742
GOLI4_HUMAN	O00461	-0.62233	0.610405
GOLM1_HUMAN	Q8NBJ4	0.291366	0.771686
GOLP3_HUMAN	Q9H4A6	-0.259096	0.634184
GOPC_HUMAN	Q9HD26	0.07473	0.990886
GORAB_HUMAN	Q5T7V8	0.222837	0.798411
GORS1_HUMAN	Q9BQQ3	0.286628	0.816658
GORS2_HUMAN	Q9H8Y8	0.0630667	0.948955
GOSR1_HUMAN	O95249	-0.58422	0.439436
GOSR2_HUMAN	O14653	-0.844139	0.602863
GOT1B_HUMAN	Q9Y3E0	1.36722	0.357292
GP180_HUMAN	Q86V85	-0.23128	0.802496
GPAA1_HUMAN	O43292	-0.135359	0.957898
GPAT1_HUMAN	Q9HCL2	0.291366	0.771686
GPAT3_HUMAN	Q53EU6	0.462423	0.832319
GPAT4_HUMAN	Q86UL3	0.64061	0.550959
GPC1_HUMAN	P35052	-0.216402	0.936854
GPD1L_HUMAN	Q8N335	-0.272932	0.80246
GPDM_HUMAN	P43304	0.0142541	0.971198
GPHRB_HUMAN	P0CG08	0.113667	0.923271
GPI8_HUMAN	Q92643	-0.403731	0.860593
GPKOW_HUMAN	Q92917	0.158177	0.798366
GPN1_HUMAN	Q9HCN4	-0.682439	0.771686
GPN3_HUMAN	Q9UHW5	-1.16471	0.745521
GPNMB_HUMAN	Q14956	2.83184	0.657209
GPX1_HUMAN	P07203	0.827321	0.624196
GPX4_HUMAN	P36969	1.35713	0.738996
GPX8_HUMAN	Q8TED1	0.84985	0.340584
GRAP1_HUMAN	Q4V328	0.611743	0.462331
GRB2_HUMAN	P62993	-1.22728	0.0297619
GRHPR_HUMAN	Q9UBQ7	1.18819	0.092874
GRM1B_HUMAN	Q3KR37	1.82872	0.3947
GRN_HUMAN	P28799	-0.143865	0.926648
GRP75_HUMAN	P38646	0.0527099	0.946821
GRPE1_HUMAN	Q9HAV7	-0.0361782	0.97734
GRPE2_HUMAN	Q8TAA5	1.05273	0.101606
GRSF1_HUMAN	Q12849	0.292438	0.755844
GRWD1_HUMAN	Q9BQ67	0.29894	0.160664
GSDME_HUMAN	O60443	0.134848	0.844656
GSH0_HUMAN	P48507	-0.00333191	0.994844
GSH1_HUMAN	P48506	-0.0300812	0.964361
GSHB_HUMAN	P48637	0.273881	0.772217
GSHR_HUMAN	P00390	0.73569	0.439114
GSK3B_HUMAN	P49841	0.480677	0.330995
GSLG1_HUMAN	Q92896	-0.917193	0.385851
GSTK1_HUMAN	Q9Y2Q3	-0.1192	0.79139
GSTM1_HUMAN	P09488	-0.665579	0.114255
GSTM3_HUMAN	P21266	0.46148	0.382129
GSTM4_HUMAN	Q03013	-1.94468	0.0760856
GSTO1_HUMAN	P78417	0.240399	0.857361
GSTP1_HUMAN	P09211	-0.122726	0.764499
GSTT2_HUMAN	P0CG30	0.242616	0.929673
GT251_HUMAN	Q8NBJ5	0.0245762	0.97734
GTF2I_HUMAN	P78347	-0.935013	0.314267
GTPB1_HUMAN	O00178	0.527706	0.634298
GTPB3_HUMAN	Q969Y2	0.345831	0.824598
GTPB6_HUMAN	O43824	0.291366	0.771686
GTPB8_HUMAN	Q8N3Z3	1.08665	0.0653909
GTPBA_HUMAN	A4D1E9	-0.241888	0.772171
GTR1_HUMAN	P11166	0.295753	0.834425
GTR3_HUMAN	P11169	0.739558	0.426993
GUAA_HUMAN	P49915	-0.140122	0.804574
GUAD_HUMAN	Q9Y2T3	4.81287	0.0274472
GUF1_HUMAN	Q8N442	0.291366	0.771686
GULP1_HUMAN	Q9UBP9	-0.16103	0.888838
GYS1_HUMAN	P13807	0.0989291	0.920944
H10_HUMAN	P07305	0.287826	0.83376
H11_HUMAN	Q02539	-3.06453	0.0190416
H12_HUMAN	P16403	0.159872	0.946821
H13_HUMAN	P16402	-0.531581	0.824598
H14_HUMAN	P10412	-1.07951	0.538898
H14_HUMAN	P10412	4.16458	0.455947
H14_HUMAN	P10412	-0.162736	0.89348
H15_HUMAN	P16401	-0.72893	0.496811
H1X_HUMAN	Q92522	0.695737	0.745521
H2A1C_HUMAN	Q93077	-2.48298	0.687658
H2A1J_HUMAN	Q99878	-0.0282522	0.996374
H2A2A_HUMAN	Q6FI13	0.444299	0.958021
H2A2A_HUMAN	Q6FI13	-0.446543	0.456169
H2AV_HUMAN	Q71UI9	-0.128045	0.879609
H2AY_HUMAN	O75367	1.42831	0.0839477
H2B1L_HUMAN	Q99880	-0.262756	0.822672
H2B2E_HUMAN	Q16778	-0.034824	0.970971
H2B2E_HUMAN	Q16778	0.322539	0.758027
H31_HUMAN	P68431	-2.5455	0.453948
H32_HUMAN	Q71DI3	0.80997	0.863516
H33_HUMAN	P84243	1.46962	0.740962
H4_HUMAN	P62805	-0.0233263	0.971165
H90B2_HUMAN	Q58FF8	-0.431002	0.791929
H90B4_HUMAN	Q58FF6	0.0919224	0.951633
HACD2_HUMAN	Q6Y1H2	0.124052	0.926648
HACD3_HUMAN	Q9P035	-0.11455	0.771686
HACL1_HUMAN	Q9UJ83	0.598364	0.590051
HAP28_HUMAN	Q13442	-0.733247	0.36437
HAT1_HUMAN	O14929	0.0146088	0.976667
HAUS1_HUMAN	Q96CS2	0.425211	0.785892
HAX1_HUMAN	O00165	0.65271	0.195575
HBA_HUMAN	P69905	-2.21732	0.740122
HBS1L_HUMAN	Q9Y450	-2.3032	0.610405
HCD2_HUMAN	Q99714	-0.560076	0.453948
HCDH_HUMAN	Q16836	-0.159516	0.868895
HCFC1_HUMAN	P51610	-0.0661069	0.943436
HD_HUMAN	P42858	1.90422	0.125414
HDAC1_HUMAN	Q13547	0.533348	0.334107
HDAC2_HUMAN	Q92769	0.0296117	0.957898
HDAC6_HUMAN	Q9UBN7	1.96755	0.69296
HDDC2_HUMAN	Q7Z4H3	-0.118914	0.885766
HDGF_HUMAN	P51858	0.772852	0.36437
HDGR2_HUMAN	Q7Z4V5	0.0131378	0.992092
HDGR2_HUMAN	Q7Z4V5	-0.847609	0.406875
HDHD2_HUMAN	Q9H0R4	0.497417	0.458318
HDHD3_HUMAN	Q9BSH5	0.291366	0.76764
HDHD5_HUMAN	Q9BXW7	-0.389987	0.715817
HEAT1_HUMAN	Q9H583	0.0817499	0.946821
HEBP1_HUMAN	Q9NRV9	0.431288	0.327255
HEBP2_HUMAN	Q9Y5Z4	0.15908	0.957634
HECD1_HUMAN	Q9ULT8	-0.756572	0.80246
HEG1_HUMAN	Q9ULI3	-1.25673	0.42384
HEM1_HUMAN	P13196	0.345831	0.705457
HEM2_HUMAN	P13716	1.95231	0.376844
HEM6_HUMAN	P36551	-0.833286	0.110813
HEMH_HUMAN	P22830	0.291366	0.719632
HERC1_HUMAN	Q15751	-0.376855	0.687658
HERC2_HUMAN	O95714	-0.924366	0.15778
HERC4_HUMAN	Q5GLZ8	-0.131406	0.961383
HERC5_HUMAN	Q9UII4	3.51914	0.0451971
HEXA_HUMAN	P06865	0.186032	0.879609
HEXB_HUMAN	P07686	0.23891	0.796027
HGH1_HUMAN	Q9BTY7	0.956503	0.764499
HGS_HUMAN	O14964	-0.424319	0.635342
HIBCH_HUMAN	Q6NVY1	0.757651	0.289247
HIG1A_HUMAN	Q9Y241	0.651308	0.45786
HIG2A_HUMAN	Q9BW72	0.558889	0.835246
HIKES_HUMAN	Q53FT3	-1.38347	0.477423
HINT1_HUMAN	P49773	0.688749	0.295977
HINT2_HUMAN	Q9BX68	0.426379	0.433764
HINT3_HUMAN	Q9NQE9	-0.0897235	0.905854
HIP1_HUMAN	O00291	0.462423	0.737191
HIP1R_HUMAN	O75146	1.68067	0.295337
HLTF_HUMAN	Q14527	1.29014	0.65017
HM13_HUMAN	Q8TCT9	0.311984	0.566022
HMCS1_HUMAN	Q01581	-2.25025	0.203048
HMDH_HUMAN	P04035	-0.246945	0.866421
HMGA1_HUMAN	P17096	0.431177	0.749498
HMGB1_HUMAN	P09429	-0.0614585	0.926648
HMGB1_HUMAN	P09429	-0.038148	0.981022
HMGB2_HUMAN	P26583	1.31715	0.274845
HMGB3_HUMAN	O15347	-0.769812	0.134815
HMGCL_HUMAN	P35914	1.80003	0.0521158
HMGN2_HUMAN	P05204	0.537335	0.867246
HMGN5_HUMAN	P82970	-1.24103	0.644248
HMMR_HUMAN	O75330	-1.92592	0.477423
HMOX1_HUMAN	P09601	-1.43906	0.388797
HMOX2_HUMAN	P30519	-0.223784	0.91876
HNMT_HUMAN	P50135	2.10142	0.46335
HNRC4_HUMAN	P0DMR1	0.536825	0.660697
HNRDL_HUMAN	O14979	-0.0965049	0.94259
HNRH1_HUMAN	P31943	-0.0960889	0.908059
HNRH2_HUMAN	P55795	-0.797302	0.5167
HNRH3_HUMAN	P31942	0.247173	0.772562
HNRL1_HUMAN	Q9BUJ2	0.376837	0.771686
HNRL2_HUMAN	Q1KMD3	-0.292894	0.562361
HNRLL_HUMAN	Q8WVV9	-0.154082	0.835246
HNRPC_HUMAN	P07910	0.211101	0.701012
HNRPD_HUMAN	Q14103	0.109634	0.496811
HNRPF_HUMAN	P52597	-0.31199	0.535447
HNRPK_HUMAN	P61978	0.615189	0.149529
HNRPL_HUMAN	P14866	0.00921664	0.988445
HNRPM_HUMAN	P52272	-0.654612	0.373802
HNRPQ_HUMAN	O60506	-0.0991745	0.938338
HNRPR_HUMAN	O43390	0.309828	0.749905
HNRPR_HUMAN	O43390	0.149115	0.928894
HNRPU_HUMAN	Q00839	-0.160504	0.834839
HOOK3_HUMAN	Q86VS8	1.1109	0.804077
HP1B3_HUMAN	Q5SSJ5	0.0761221	0.957705
HPBP1_HUMAN	Q9NZL4	0.54782	0.381471
HPCL1_HUMAN	P37235	-0.861949	0.54173
HPDL_HUMAN	Q96IR7	-1.3868	0.285633
HPF1_HUMAN	Q9NWY4	0.56646	0.740882
HPRT_HUMAN	P00492	-0.04709	0.92851
HS105_HUMAN	Q92598	-0.738081	0.101207
HS2ST_HUMAN	Q7LGA3	-0.522847	0.80246
HS71B_HUMAN	P0DMV9	-0.199926	0.771686
HS74L_HUMAN	O95757	0.105486	0.971226
HS90A_HUMAN	P07900	-0.466685	0.452903
HS90A_HUMAN	P07900	-0.514069	0.0752486
HS90B_HUMAN	P08238	-0.610542	0.34262
HS90B_HUMAN	P08238	-1.44538	0.626269
HSBP1_HUMAN	O75506	-1.52089	0.572602
HSC20_HUMAN	Q8IWL3	-0.00596456	0.994417
HSDL1_HUMAN	Q3SXM5	-0.358663	0.699379
HSDL2_HUMAN	Q6YN16	0.41151	0.685391
HSF1_HUMAN	Q00613	1.37761	0.139209
HSP13_HUMAN	P48723	0.0860114	0.925697
HSP74_HUMAN	P34932	0.0581867	0.923429
HSP76_HUMAN	P17066	-0.4643	0.611791
HSP7C_HUMAN	P11142	-0.157557	0.754018
HSP7E_HUMAN	Q0VDF9	-0.192206	0.86452
HSPB1_HUMAN	P04792	-1.00138	0.234742
HTAI2_HUMAN	Q9BUP3	-0.477196	0.535447
HTR5A_HUMAN	Q86XA9	2.63056	0.0864821
HTRA2_HUMAN	O43464	-0.160485	0.815998
HTSF1_HUMAN	O43719	-2.12512	0.327394
HUWE1_HUMAN	Q7Z6Z7	-0.872203	0.188881
HXK1_HUMAN	P19367	0.173332	0.771686
HXK2_HUMAN	P52789	0.106996	0.808413
HYEP_HUMAN	P07099	-0.210332	0.862274
HYI_HUMAN	Q5T013	1.16424	0.535447
HYOU1_HUMAN	Q9Y4L1	-0.283377	0.729806
HYPK_HUMAN	Q9NX55	0.326859	0.615395
I2BP2_HUMAN	Q7Z5L9	-1.09606	0.359937
I2BPL_HUMAN	Q9H1B7	-0.151388	0.928894
IAH1_HUMAN	Q2TAA2	0.0861705	0.975835
IASPP_HUMAN	Q8WUF5	1.71966	0.0312203
IBP7_HUMAN	Q16270	0.119132	0.913221
ICAL_HUMAN	P20810	0.696017	0.566
ICAM1_HUMAN	P05362	-1.62862	0.136303
ICLN_HUMAN	P54105	0.0554712	0.976667
ICT1_HUMAN	Q14197	-2.14755	0.0878052
IDE_HUMAN	P14735	-1.86564	0.048653
IDH3A_HUMAN	P50213	-0.21356	0.795248
IDH3B_HUMAN	O43837	0.291298	0.69296
IDH3G_HUMAN	P51553	-0.441778	0.66032
IDHC_HUMAN	O75874	2.01286	0.0297619
IDHP_HUMAN	P48735	-0.613463	0.436645
IDI1_HUMAN	Q13907	-0.764591	0.167543
IF16_HUMAN	Q16666	-0.0643213	0.92058
IF1AX_HUMAN	P47813	-0.22497	0.775782
IF2A_HUMAN	P05198	0.443792	0.454187
IF2B_HUMAN	P20042	0.248768	0.771686
IF2B1_HUMAN	Q9NZI8	0.330086	0.771686
IF2B2_HUMAN	Q9Y6M1	-0.322676	0.863009
IF2B3_HUMAN	O00425	-0.610711	0.426843
IF2G_HUMAN	P41091	0.129372	0.785962
IF2M_HUMAN	P46199	0.291366	0.771686
IF2P_HUMAN	O60841	0.773097	0.431001
IF3M_HUMAN	Q9H2K0	0.810863	0.550069
IF4A1_HUMAN	P60842	-0.784094	0.0255614
IF4A2_HUMAN	Q14240	-0.158265	0.824598
IF4A3_HUMAN	P38919	-0.162387	0.771686
IF4B_HUMAN	P23588	-0.455973	0.376844
IF4E_HUMAN	P06730	-0.589986	0.452691
IF4E2_HUMAN	O60573	-2.66753	0.345614
IF4G1_HUMAN	Q04637	-0.417062	0.433764
IF4G2_HUMAN	P78344	-0.345993	0.688809
IF4G3_HUMAN	O43432	0.116716	0.955198
IF4H_HUMAN	Q15056	-0.886394	0.351148
IF5_HUMAN	P55010	-0.114754	0.924307
IF5A1_HUMAN	P63241	-0.452881	0.536035
IF6_HUMAN	P56537	0.0560612	0.956443
IFG15_HUMAN	Q9H496	-0.209577	0.829198
IFM3_HUMAN	Q01628	-1.29824	0.5167
IFT25_HUMAN	Q9Y547	1.35277	0.139899
IGBP1_HUMAN	P78318	0.85388	0.764249
IGF1R_HUMAN	P08069	-0.0624165	0.949207
IGS22_HUMAN	Q8N9C0	0.309501	0.988445
IGSF3_HUMAN	O75054	0.291366	0.700219
IGSF8_HUMAN	Q969P0	-0.0526294	0.957705
IKIP_HUMAN	Q70UQ0	-0.321738	0.705737
IKKA_HUMAN	O15111	0.287607	0.893357
IKKB_HUMAN	O14920	3.40913	0.408054
IL18_HUMAN	Q14116	2.29324	0.0669399
IL1AP_HUMAN	Q9NPH3	1.14099	0.626262
IL6RB_HUMAN	P40189	-0.174493	0.917202
ILEU_HUMAN	P30740	1.8458	0.397256
ILF2_HUMAN	Q12905	-0.27452	0.464771
ILF3_HUMAN	Q12906	-0.558342	0.737191
ILK_HUMAN	Q13418	0.442992	0.535447
ILKAP_HUMAN	Q9H0C8	0.377414	0.181778
ILVBL_HUMAN	A1L0T0	-0.858016	0.589626
IMA1_HUMAN	P52292	-0.936494	0.0428463
IMA3_HUMAN	O00629	-0.13001	0.934711
IMA4_HUMAN	O00505	-0.515722	0.393834
IMA5_HUMAN	P52294	-0.0606512	0.939999
IMA7_HUMAN	O60684	-0.110437	0.951145
IMA7_HUMAN	O60684	0.240479	0.771686
IMB1_HUMAN	Q14974	-0.529386	0.166478
IMDH1_HUMAN	P20839	-1.92942	0.301593
IMDH2_HUMAN	P12268	-0.803646	0.0994747
IMP3_HUMAN	Q9NV31	-1.04866	0.331068
IMP4_HUMAN	Q96G21	-0.983236	0.159529
IMPA1_HUMAN	P29218	0.417451	0.535447
IMPA2_HUMAN	O14732	1.69293	0.771686
IMPA3_HUMAN	Q9NX62	0.203468	0.764249
IMUP_HUMAN	Q9GZP8	2.99118	0.182664
IN35_HUMAN	P80217	0.280461	0.780581
INF2_HUMAN	Q27J81	1.74141	0.298212
INGR1_HUMAN	P15260	-1.33466	0.52568
INPP_HUMAN	P49441	2.47167	0.157029
INT1_HUMAN	Q8N201	-0.195691	0.939221
INT13_HUMAN	Q9NVM9	-0.535173	0.680937
INT14_HUMAN	Q96SY0	0.188474	0.382129
INT2_HUMAN	Q9H0H0	-0.588475	0.805398
INT3_HUMAN	Q68E01	-0.498035	0.531363
INT4_HUMAN	Q96HW7	-1.28923	0.621431
INT6_HUMAN	Q9UL03	-0.374643	0.743039
INT8_HUMAN	Q75QN2	-0.689069	0.752222
IPO11_HUMAN	Q9UI26	0.614674	0.0190416
IPO13_HUMAN	O94829	0.139085	0.885766
IPO4_HUMAN	Q8TEX9	-0.204573	0.771686
IPO5_HUMAN	O00410	0.0853564	0.860531
[truncated: 3,077 more rows]

## Sheet: Isolated mitochondria
Figure 6-2. Quantitative MS data of isolated mitochondria of WT and PTCD1 KO cells.
Protein	Uniprot Accession Number	log2 FC	adjusted p-value
1433B_HUMAN	P31946	1.08816	0.161077
1433B_HUMAN	P31946	0.407449	0.807045
1433E_HUMAN	P62258	0.427771	0.6769
1433F_HUMAN	Q04917	0.72948	0.125183
1433G_HUMAN	P61981	0.407449	0.416268
1433S_HUMAN	P31947	0.407449	0.416268
1433T_HUMAN	P27348	1.15825	0.257925
1433Z_HUMAN	P63104	1.3609	0.0515282
1A68_HUMAN	P01891	-1.05158	0.0319481
1A69_HUMAN	P10316	-1.13837	0.566112
1B15_HUMAN	P30464	-0.819226	0.151572
1B15_HUMAN	P30464	-0.976158	0.288385
1C06_HUMAN	Q29963	-1.67782	0.115385
1C07_HUMAN	P10321	-1.14687	0.140316
1C12_HUMAN	P30508	-0.450604	0.519492
1C12_HUMAN	P30508	-0.640064	0.212838
2A5D_HUMAN	Q14738	0.407449	0.416268
2A5E_HUMAN	Q16537	-0.316555	0.890883
2A5G_HUMAN	Q13362	0.580105	0.430778
2AAA_HUMAN	P30153	0.586434	0.322906
2AAB_HUMAN	P30154	-0.210491	0.88375
2ABA_HUMAN	P63151	0.600239	0.28999
3HIDH_HUMAN	P31937	-1.40936	0.163124
3MG_HUMAN	P29372	-1.24681	0.416268
41_HUMAN	P11171	1.15589	0.680462
4F2_HUMAN	P08195	0.457918	0.292431
5NT3A_HUMAN	Q9H0P0	-1.38686	0.279933
5NTC_HUMAN	P49902	0.580105	0.424718
5NTD_HUMAN	P21589	2.66946	0.102826
68MP_HUMAN	P56378	-2.27773	0.0480228
6PGD_HUMAN	P52209	0.629686	0.416268
6PGL_HUMAN	O95336	0.4422	0.416268
8ODP_HUMAN	P36639	-0.892153	0.613358
A16A1_HUMAN	Q8IZ83	0.407449	0.589532
A4_HUMAN	P05067	-0.169403	0.719291
A7L3B_HUMAN	Q96GX2	0.0987999	0.882279
AAAS_HUMAN	Q9NRG9	0.374538	0.474977
AAAT_HUMAN	Q15758	0.574287	0.279933
AAED1_HUMAN	Q7RTV5	-0.940906	0.532489
AAKB2_HUMAN	O43741	0.186499	0.858955
AAKG1_HUMAN	P54619	0.606133	0.408418
AAMDC_HUMAN	Q9H7C9	0.580105	0.424718
AAMP_HUMAN	Q13685	0.407449	0.654508
AAPK1_HUMAN	Q13131	0.247535	0.63278
AAR2_HUMAN	Q9Y312	0.373186	0.43927
AASD1_HUMAN	Q9BTE6	0.407449	0.416268
AASS_HUMAN	Q9UDR5	-2.47223	0.0569505
AATC_HUMAN	P17174	0.407449	0.416268
AATF_HUMAN	Q9NY61	0.707039	0.629123
AATM_HUMAN	P00505	-0.175093	0.827028
AB17B_HUMAN	Q5VST6	1.24346	0.814125
ABCA2_HUMAN	Q9BZC7	3.33706	0.120488
ABCB6_HUMAN	Q9NP58	0.0473807	0.978035
ABCB7_HUMAN	O75027	-0.19925	0.733582
ABCB8_HUMAN	Q9NUT2	0.630759	0.826915
ABCBA_HUMAN	Q9NRK6	-0.269805	0.550138
ABCD1_HUMAN	P33897	-0.404377	0.545705
ABCD3_HUMAN	P28288	-0.00959807	0.990315
ABCE1_HUMAN	P61221	0.862537	0.241664
ABCF1_HUMAN	Q8NE71	-0.353687	0.727685
ABCF2_HUMAN	Q9UG63	-0.684793	0.416268
ABCF3_HUMAN	Q9NUQ8	0.272586	0.827028
ABCG2_HUMAN	Q9UNQ0	-2.77871	0.0816185
ABD12_HUMAN	Q8N2K0	-0.104605	0.866036
ABHD5_HUMAN	Q8WTS1	1.07927	0.284264
ABHD6_HUMAN	Q9BV23	1.00279	0.410913
ABHDA_HUMAN	Q9NUJ1	0.2005	0.830168
ABHDB_HUMAN	Q8NFV4	-0.641462	0.688504
ABHDD_HUMAN	Q7L211	-0.336241	0.629322
ABHEA_HUMAN	Q9BUJ0	0.339282	0.667222
ABHEB_HUMAN	Q96IU4	0.407449	0.416268
ABHGA_HUMAN	O95870	-0.238686	0.840056
ABI1_HUMAN	Q8IZP0	0.0409091	0.940877
ABLM1_HUMAN	O14639	0.964428	0.309391
ABLM3_HUMAN	O94929	2.36621	0.411065
ABRAL_HUMAN	Q9P1F3	0.674592	0.361059
ABT1_HUMAN	Q9ULW3	0.593177	0.424718
ACACA_HUMAN	Q13085	-0.999353	0.416268
ACACB_HUMAN	O00763	0.0928475	0.970961
ACAD8_HUMAN	Q9UKU7	-0.347069	0.835688
ACAD9_HUMAN	Q9H845	-0.677299	0.257925
ACADL_HUMAN	P28330	3.99094	0.00371054
ACADM_HUMAN	P11310	0.184237	0.733356
ACADS_HUMAN	P16219	-0.73836	0.736976
ACADV_HUMAN	P49748	0.373635	0.416268
ACATN_HUMAN	O00400	-0.0792775	0.968267
ACBD5_HUMAN	Q5T8D3	-1.26717	0.410281
ACBP_HUMAN	P07108	-0.134104	0.926395
ACD11_HUMAN	Q709F0	1.03524	0.238223
ACDSB_HUMAN	P45954	1.74256	0.449312
ACINU_HUMAN	Q9UKV3	0.407449	0.416268
ACKR3_HUMAN	P25106	-2.43626	0.12604
ACL6A_HUMAN	O96019	-0.2745	0.886389
ACLY_HUMAN	P53396	-0.393603	0.53566
ACO13_HUMAN	Q9NPJ3	0.403617	0.636574
ACOC_HUMAN	P21399	0.516239	0.358402
ACOD_HUMAN	O00767	-3.41922	0.0023313
ACON_HUMAN	Q99798	0.0282875	0.974943
ACOT1_HUMAN	Q86TX2	0.0433677	0.988048
ACOT2_HUMAN	P49753	0.377273	0.587105
ACOT2_HUMAN	P49753	0.176329	0.882279
ACOT8_HUMAN	O14734	0.934846	0.335829
ACOT9_HUMAN	Q9Y305	-0.484155	0.617253
ACOX1_HUMAN	Q15067	-0.833616	0.0355598
ACOX3_HUMAN	O15254	0.61931	0.288622
ACPH_HUMAN	P13798	0.407449	0.416268
ACPM_HUMAN	O14561	-1.34692	0.214107
ACSF3_HUMAN	Q4G176	-0.334087	0.642015
ACSF4_HUMAN	Q4L235	4.52991	0.416268
ACSL1_HUMAN	P33121	-0.306206	0.63665
ACSL3_HUMAN	O95573	0.438505	0.416268
ACSL4_HUMAN	O60488	-1.41526	0.133214
ACTB_HUMAN	P60709	0.0108475	0.995162
ACTBL_HUMAN	Q562R1	0.35723	0.896378
ACTC_HUMAN	P68032	-1.41942	0.416268
ACTG_HUMAN	P63261	-0.191938	0.680828
ACTH_HUMAN	P63267	-1.8429	0.575025
ACTN1_HUMAN	P12814	0.713539	0.287121
ACTN4_HUMAN	O43707	1.07058	0.332657
ACTY_HUMAN	P42025	0.580105	0.855387
ACTZ_HUMAN	P61163	0.58836	0.419032
ACY1_HUMAN	Q03154	0.543442	0.424718
ACYP1_HUMAN	P07311	0.407449	0.416268
ADA10_HUMAN	O14672	-2.009	0.0103393
ADA15_HUMAN	Q13444	-0.563559	0.645084
ADA17_HUMAN	P78536	-0.346927	0.606597
ADAM9_HUMAN	Q13443	-0.396346	0.834887
ADAS_HUMAN	O00116	0.168979	0.761641
ADCY3_HUMAN	O60266	0.728982	0.407593
ADCY6_HUMAN	O43306	1.62513	0.293592
ADCY7_HUMAN	P51828	-1.05299	0.115385
ADCY9_HUMAN	O60503	0.565457	0.71348
ADDA_HUMAN	P35611	0.563333	0.732069
ADDB_HUMAN	P35612	2.49023	0.617253
ADDG_HUMAN	Q9UEY8	1.4889	0.691329
ADGB_HUMAN	Q8N7X0	-1.13375	0.416268
ADHX_HUMAN	P11766	0.407449	0.417763
ADK_HUMAN	P55263	0.407449	0.416268
ADNP_HUMAN	Q9H2P0	0.407449	0.416268
ADPGK_HUMAN	Q9BRR6	-1.11078	0.00378106
ADPPT_HUMAN	Q9NRN7	0.164676	0.912467
ADRM1_HUMAN	Q16186	0.677934	0.342799
ADRO_HUMAN	P22570	-0.937034	0.416268
ADT1_HUMAN	P12235	0.370468	0.506441
ADT2_HUMAN	P05141	-0.128339	0.7174
ADT2_HUMAN	P05141	-0.26616	0.521188
ADT3_HUMAN	P12236	-0.74887	0.041644
ADX_HUMAN	P10109	0.428657	0.326192
AEDO_HUMAN	Q96SZ5	-0.628221	0.554258
AF1L2_HUMAN	Q8N4X5	0.543442	0.424718
AF1Q_HUMAN	Q13015	-0.418711	0.610568
AFAD_HUMAN	P55196	2.36769	0.39892
AFAP1_HUMAN	Q8N556	-0.182896	0.688861
AFG32_HUMAN	Q9Y4W6	-1.1711	0.144207
AG10B_HUMAN	Q5I7T1	-0.0485514	0.97826
AGAL_HUMAN	P06280	-1.1076	0.6769
AGFG1_HUMAN	P52594	-0.818603	0.790174
AGK_HUMAN	Q53H12	-0.519207	0.46022
AGM1_HUMAN	O95394	0.407449	0.416268
AGO2_HUMAN	Q9UKV8	-0.572759	0.664538
AGRG1_HUMAN	Q9Y653	-0.788339	0.745653
AGRIN_HUMAN	O00468	0.87226	0.179965
AHNK_HUMAN	Q09666	0.134709	0.886773
AHNK2_HUMAN	Q8IVF2	-0.31807	0.808336
AHSA1_HUMAN	O95433	-1.33177	0.478753
AIDA_HUMAN	Q96BJ3	1.4624	0.257646
AIFM1_HUMAN	O95831	-0.0375783	0.952951
AIFM2_HUMAN	Q9BRQ8	0.387497	0.619559
AIMP1_HUMAN	Q12904	-0.00709823	0.993574
AIMP2_HUMAN	Q13155	0.0917446	0.908228
AINX_HUMAN	Q16352	1.01943	0.189333
AIP_HUMAN	O00170	-0.260594	0.808586
AK1A1_HUMAN	P14550	0.407449	0.416268
AK1C1_HUMAN	Q04828	0.407449	0.416268
AK1C2_HUMAN	P52895	0.407449	0.698446
AK1C3_HUMAN	P42330	0.813311	0.416268
AK1D1_HUMAN	P51857	1.9659	0.424718
AKA12_HUMAN	Q02952	3.11039	0.0613013
AKAP1_HUMAN	Q92667	-0.0196916	0.981383
AKAP2_HUMAN	Q9Y2D5	1.97659	0.0827128
AKAP8_HUMAN	O43823	-0.250746	0.88338
AKAP9_HUMAN	Q99996	0.407449	0.416268
AKP13_HUMAN	Q12802	0.336988	0.870967
AKP8L_HUMAN	Q9ULX6	0.407449	0.416268
AKT2_HUMAN	P31751	0.407449	0.416268
AKTS1_HUMAN	Q96B36	-0.32637	0.882279
AL1B1_HUMAN	P30837	0.825702	0.207132
AL1L2_HUMAN	Q3SY69	0.223811	0.813091
AL3A1_HUMAN	P30838	0.543442	0.424718
AL3A2_HUMAN	P51648	-0.048175	0.953994
AL3B1_HUMAN	P43353	1.66786	0.24777
AL4A1_HUMAN	P30038	-1.33423	0.535619
AL7A1_HUMAN	P49419	-0.177828	0.831539
AL9A1_HUMAN	P49189	-0.818093	0.416268
ALAT2_HUMAN	Q8TD30	0.863829	0.667222
ALDH2_HUMAN	P05091	0.111723	0.890657
ALDH2_HUMAN	P05091	0.530221	0.561843
ALDOA_HUMAN	P04075	-0.146126	0.943952
ALDOC_HUMAN	P09972	-0.108809	0.946735
ALDR_HUMAN	P15121	-1.05354	0.416268
ALG1_HUMAN	Q9BT22	-0.687349	0.416268
ALG13_HUMAN	Q9NP73	-1.20007	0.478003
ALG2_HUMAN	Q9H553	1.00405	0.18168
ALG3_HUMAN	Q92685	-0.123366	0.883777
ALG5_HUMAN	Q9Y673	-0.279833	0.395456
ALG9_HUMAN	Q9H6U8	-1.33424	0.569875
ALKB5_HUMAN	Q6P6C2	0.148866	0.974943
ALKB7_HUMAN	Q9BT30	-2.95385	0.310764
ALR_HUMAN	P55789	2.289	0.416268
AMACR_HUMAN	Q9UHK6	-1.07102	0.416268
AMD_HUMAN	P19021	-0.72775	0.416268
AMFR_HUMAN	Q9UKV5	-2.87271	0.14337
AMGO2_HUMAN	Q86SJ2	0.421625	0.835688
AMPB_HUMAN	Q9H4A4	0.407449	0.416268
AMPD2_HUMAN	Q01433	1.57624	0.424718
AMPL_HUMAN	P28838	-0.266832	0.489846
AMPN_HUMAN	P15144	-0.688724	0.416268
AMRP_HUMAN	P30533	-0.557664	0.608799
AN32A_HUMAN	P39687	0.452559	0.861022
AN32B_HUMAN	Q92688	1.42604	0.536697
AN32E_HUMAN	Q9BTT0	0.435741	0.882279
ANFY1_HUMAN	Q9P2R3	0.935722	0.41286
ANKH1_HUMAN	Q8IWZ3	1.66261	0.24816
ANKL2_HUMAN	Q86XL3	-0.898015	0.526955
ANKZ1_HUMAN	Q9H8Y5	2.19787	0.135436
ANLN_HUMAN	Q9NQW6	0.339904	0.827028
ANM1_HUMAN	Q99873	0.427139	0.416268
ANM3_HUMAN	O60678	-0.514869	0.712891
ANM5_HUMAN	O14744	0.407449	0.416268
ANO10_HUMAN	Q9NW15	0.305485	0.721323
ANO3_HUMAN	Q9BYT9	0.392388	0.732339
ANO6_HUMAN	Q4KMQ2	-0.128605	0.833747
ANPRC_HUMAN	P17342	1.90413	0.253604
ANR17_HUMAN	O75179	-0.749652	0.391754
ANR28_HUMAN	O15084	1.00931	0.416268
ANTR1_HUMAN	Q9H6X2	0.369441	0.416268
ANX10_HUMAN	Q9UJ72	0.407449	0.504368
ANX11_HUMAN	P50995	2.55161	0.209004
ANX13_HUMAN	P27216	-1.09941	0.73215
ANXA1_HUMAN	P04083	1.54356	0.123956
ANXA2_HUMAN	P07355	0.382238	0.572312
ANXA3_HUMAN	P12429	0.840759	0.361059
ANXA4_HUMAN	P09525	1.16574	0.18168
ANXA5_HUMAN	P08758	-0.0750133	0.915334
ANXA6_HUMAN	P08133	-0.0189821	0.97826
ANXA7_HUMAN	P20073	1.16381	0.180703
ANXA8_HUMAN	P13928	0.543442	0.424718
ANXA8_HUMAN	P13928	0.407449	0.416268
AOFA_HUMAN	P21397	-0.35324	0.604266
AOFB_HUMAN	P27338	4.3846	0.00422545
AP1B1_HUMAN	Q10567	0.262337	0.920842
AP1G1_HUMAN	O43747	0.32709	0.575274
AP1M1_HUMAN	Q9BXS5	0.520516	0.84407
AP1S1_HUMAN	P61966	-1.20931	0.227218
AP1S3_HUMAN	Q96PC3	2.19226	0.358402
AP2A1_HUMAN	O95782	0.417345	0.592316
AP2A2_HUMAN	O94973	0.103277	0.942579
AP2B1_HUMAN	P63010	-0.0317023	0.952951
AP2M1_HUMAN	Q96CW1	-0.00451897	0.994136
AP2S1_HUMAN	P53680	-0.281031	0.520364
AP3B1_HUMAN	O00203	0.187015	0.832417
AP3B2_HUMAN	Q13367	-1.41946	0.176023
AP3D1_HUMAN	O14617	-0.123304	0.920043
AP3M1_HUMAN	Q9Y2T2	0.223314	0.886547
AP3S1_HUMAN	Q92572	0.467127	0.680828
AP4A_HUMAN	P50583	0.407449	0.416268
AP5S1_HUMAN	Q9NUS5	0.30941	0.918954
APC1_HUMAN	Q9H1A4	0.131159	0.846495
APC16_HUMAN	Q96DE5	-0.684286	0.672236
APC5_HUMAN	Q9UJX4	0.806413	0.335921
APC7_HUMAN	Q9UJX3	0.341398	0.855718
APEX1_HUMAN	P27695	0.178601	0.91723
APH1A_HUMAN	Q96BI3	1.47447	0.432124
API5_HUMAN	Q9BZZ5	0.389742	0.430429
APLP2_HUMAN	Q06481	0.15202	0.930575
APMAP_HUMAN	Q9HDC9	-0.611737	0.203657
APOB_HUMAN	P04114	-0.664547	0.739435
APOC3_HUMAN	P02656	-1.82346	0.329421
APOL2_HUMAN	Q9BQE5	0.051253	0.955945
APOP1_HUMAN	Q96IL0	-2.54906	0.00013722
APT_HUMAN	P07741	0.407449	0.416268
APTX_HUMAN	Q7Z2E3	1.77283	0.581565
AQR_HUMAN	O60306	0.184095	0.861427
AQR_HUMAN	O60306	0.750436	0.829232
AR2BP_HUMAN	Q9Y2Y0	0.580105	0.424718
AR6P1_HUMAN	Q15041	-0.458408	0.776429
ARAID_HUMAN	Q6UW56	0.610011	0.695397
ARAP1_HUMAN	Q96P48	0.853619	0.416268
ARC1A_HUMAN	Q92747	0.536642	0.568747
ARC1B_HUMAN	O15143	-0.458291	0.459635
ARCH_HUMAN	Q8IWT0	0.585249	0.416268
ARF_HUMAN	Q8N726	0.148346	0.915767
ARF1_HUMAN	P84077	-0.00313218	0.995207
ARF4_HUMAN	P18085	0.239491	0.754126
ARF5_HUMAN	P84085	-1.22224	0.391417
ARF6_HUMAN	P62330	0.118194	0.881425
ARFG1_HUMAN	Q8N6T3	0.130946	0.940877
ARFG2_HUMAN	Q8N6H7	0.624047	0.416268
ARFP2_HUMAN	P53365	-0.0968952	0.946735
ARFRP_HUMAN	Q13795	-1.27994	0.416268
ARGI2_HUMAN	P78540	-0.382217	0.688141
ARHG1_HUMAN	Q92888	0.899422	0.5839
ARHG2_HUMAN	Q92974	2.03811	0.00713346
ARHG7_HUMAN	Q14155	1.12464	0.733836
ARHGI_HUMAN	Q6ZSZ5	-1.55062	0.416268
ARHL2_HUMAN	Q9NX46	-2.49038	0.0151306
ARI1_HUMAN	Q9Y4X5	0.133825	0.954248
ARI1A_HUMAN	O14497	-0.251347	0.834164
ARI1A_HUMAN	O14497	-0.074241	0.960204
ARI1B_HUMAN	Q8NFD5	-0.900633	0.604266
ARI2_HUMAN	O95376	0.407449	0.416268
ARID2_HUMAN	Q68CP9	-0.322967	0.769509
ARK72_HUMAN	O43488	-0.599313	0.522107
ARL1_HUMAN	P40616	-0.588559	0.416268
ARL10_HUMAN	Q8N8L6	-0.0416446	0.950801
ARL15_HUMAN	Q9NXU5	-1.14885	0.416268
ARL2_HUMAN	P36404	-2.42057	0.185577
ARL3_HUMAN	P36405	0.584849	0.273313
ARL8A_HUMAN	Q96BM9	0.134775	0.883777
ARL8B_HUMAN	Q9NVJ2	0.0585116	0.952951
ARM10_HUMAN	Q8N2F6	-0.457714	0.436618
ARMC1_HUMAN	Q9NVT9	0.433845	0.667222
ARMC6_HUMAN	Q6NXE6	-0.895216	0.60338
ARMT1_HUMAN	Q9H993	0.407449	0.748194
ARMX1_HUMAN	Q9P291	-0.2908	0.761641
ARMX2_HUMAN	Q7L311	-0.692367	0.416268
ARMX3_HUMAN	Q9UH62	-0.348601	0.483593
AROS_HUMAN	Q86WX3	-1.88398	0.250771
ARP10_HUMAN	Q9NZ32	0.354805	0.794756
ARP19_HUMAN	P56211	0.578839	0.73323
ARP2_HUMAN	P61160	0.156868	0.796962
ARP3_HUMAN	P61158	-0.109815	0.942579
ARP5L_HUMAN	Q9BPX5	0.21812	0.643003
ARPC2_HUMAN	O15144	0.0299869	0.974943
ARPC3_HUMAN	O15145	0.104863	0.928305
ARPC4_HUMAN	P59998	0.0123996	0.984623
ARPC5_HUMAN	O15511	-0.301617	0.58036
ARPIN_HUMAN	Q7Z6K5	0.438728	0.416268
ASAH1_HUMAN	Q13510	1.92002	0.238223
ASCC2_HUMAN	Q9H1I8	-0.265822	0.782154
ASCC3_HUMAN	Q8N3C0	-0.0665562	0.94844
ASF1A_HUMAN	Q9Y294	-0.370549	0.719216
ASF1B_HUMAN	Q9NVP2	-0.449549	0.745714
ASHWN_HUMAN	Q9BVC5	1.13701	0.718808
ASNA_HUMAN	O43681	0.250608	0.83352
ASNS_HUMAN	P08243	0.571002	0.416268
ASPG_HUMAN	P20933	0.0987999	0.948613
ASPH_HUMAN	Q12797	0.00472635	0.995162
ASPM_HUMAN	Q8IZT6	0.580105	0.424718
ASSY_HUMAN	P00966	0.407449	0.416268
AT11B_HUMAN	Q9Y2G3	1.03555	0.416268
AT11C_HUMAN	Q8NB49	-0.80267	0.528265
AT131_HUMAN	Q9HD20	0.872972	0.361059
AT133_HUMAN	Q9H7F0	-0.298452	0.893961
AT1A1_HUMAN	P05023	0.475463	0.647707
AT1B1_HUMAN	P05026	0.773356	0.408467
AT1B3_HUMAN	P54709	0.391007	0.495599
AT1B4_HUMAN	Q9UN42	0.0352289	0.978035
AT2A2_HUMAN	P16615	-0.474273	0.330568
AT2A3_HUMAN	Q93084	0.407449	0.430559
AT2B1_HUMAN	P20020	0.258279	0.754161
AT2B2_HUMAN	Q01814	-0.755205	0.696438
AT2B3_HUMAN	Q16720	-1.66043	0.411356
AT2B4_HUMAN	P23634	2.34455	0.0702271
AT2C1_HUMAN	P98194	0.126723	0.901168
AT5EL_HUMAN	Q5VTU8	-0.647731	0.416268
AT5F1_HUMAN	P24539	-0.34934	0.710402
AT5G2_HUMAN	Q06055	1.58321	0.646165
ATAD1_HUMAN	Q8NBU5	-0.150499	0.815466
ATAD2_HUMAN	Q6PL18	0.0987999	0.882279
ATD3A_HUMAN	Q9NVI7	0.0534892	0.962872
ATD3B_HUMAN	Q5T9A4	0.398578	0.723901
ATD3B_HUMAN	Q5T9A4	-0.0139323	0.989109
ATF1_HUMAN	P18846	0.407449	0.416268
ATF6A_HUMAN	P18850	-1.43329	0.349007
ATF6B_HUMAN	Q99941	-1.41829	0.554258
ATG3_HUMAN	Q9NT62	1.50314	0.308345
ATG9A_HUMAN	Q7Z3C6	0.972463	0.44925
ATGA1_HUMAN	Q9BSB4	0.543442	0.424718
ATIF1_HUMAN	Q9UII2	-0.48931	0.533536
ATLA2_HUMAN	Q8NHH9	-0.474872	0.726352
ATLA3_HUMAN	Q6DD88	0.477446	0.463987
ATP5H_HUMAN	O75947	-0.339025	0.775794
ATP5I_HUMAN	P56385	-0.592613	0.291946
ATP5J_HUMAN	P18859	-0.814128	0.379449
ATP5L_HUMAN	O75964	-0.65335	0.176676
ATP5S_HUMAN	Q99766	-0.639215	0.761641
ATP6_HUMAN	P00846	-8.36182	7.53781e-05
ATP7A_HUMAN	Q04656	0.189129	0.841105
ATP8_HUMAN	P03928	-5.27431	0.00134603
ATP9A_HUMAN	O75110	1.70412	0.416268
ATPA_HUMAN	P25705	-0.277193	0.433932
ATPB_HUMAN	P06576	-0.372289	0.356005
ATPD_HUMAN	P30049	-0.586562	0.463987
ATPF1_HUMAN	Q5TC12	-1.252	0.348922
ATPF2_HUMAN	Q8N5M1	-1.41338	0.0739462
ATPG_HUMAN	P36542	-0.264555	0.478359
ATPK_HUMAN	P56134	-0.674172	0.247298
ATPO_HUMAN	P48047	-0.231444	0.817655
ATR_HUMAN	Q13535	1.2095	0.50431
ATRAP_HUMAN	Q6RW13	0.90495	0.0752975
ATRX_HUMAN	P46100	0.168332	0.797402
ATX10_HUMAN	Q9UBB4	-1.59489	0.416268
ATX2_HUMAN	Q99700	0.398616	0.446164
ATX2L_HUMAN	Q8WWM7	-0.229567	0.646852
AUHM_HUMAN	Q13825	0.818495	0.661672
AUP1_HUMAN	Q9Y679	-0.741251	0.427762
AURKA_HUMAN	O14965	-0.193437	0.565209
AURKB_HUMAN	Q96GD4	-0.431066	0.296987
AXA81_HUMAN	Q5VT79	0.407449	0.416268
B2CL1_HUMAN	Q07817	1.80947	0.150962
B2L11_HUMAN	O43521	2.22617	0.416268
B2L12_HUMAN	Q9HB09	0.919126	0.335381
B2L13_HUMAN	Q9BXK5	0.122033	0.838299
B2MG_HUMAN	P61769	-0.904224	0.251304
B3A2_HUMAN	P04920	-1.04824	0.291526
B3GA3_HUMAN	O94766	-0.367172	0.416268
B3GLT_HUMAN	Q6Y288	0.565302	0.521328
B3GT6_HUMAN	Q96L58	-1.59597	0.116013
B4GA1_HUMAN	O43505	-0.274363	0.912467
B4GT1_HUMAN	P15291	0.844591	0.300237
B4GT5_HUMAN	O43286	0.325454	0.839438
B4GT7_HUMAN	Q9UBV7	-0.430772	0.452822
BABA2_HUMAN	Q9NXR7	0.551594	0.83592
BACH_HUMAN	O00154	1.6159	0.254962
BAD_HUMAN	Q92934	0.477473	0.416268
BAF_HUMAN	O75531	0.372781	0.539057
BAG1_HUMAN	Q99933	0.342538	0.882279
BAG2_HUMAN	O95816	-0.451767	0.554094
BAG3_HUMAN	O95817	-0.133275	0.629123
BAG5_HUMAN	Q9UL15	0.27737	0.919104
BAG6_HUMAN	P46379	-0.12102	0.932479
BAIP2_HUMAN	Q9UQB8	-0.317063	0.48277
BAK_HUMAN	Q16611	0.36166	0.744647
BAP18_HUMAN	Q8IXM2	-0.346548	0.611797
BAP29_HUMAN	Q9UHQ4	-0.624035	0.560483
BAP31_HUMAN	P51572	-0.305153	0.416268
BASI_HUMAN	P35613	0.328336	0.574412
BASP1_HUMAN	P80723	0.461877	0.57315
BAX_HUMAN	Q07812	0.462382	0.703183
BAZ1A_HUMAN	Q9NRL2	-0.692787	0.646312
BAZ1B_HUMAN	Q9UIG0	0.24924	0.805922
BCAM_HUMAN	P50895	4.84328	0.000193018
BCAT1_HUMAN	P54687	0.407449	0.416268
BCAT2_HUMAN	O15382	-0.564163	0.559338
BCCIP_HUMAN	Q9P287	0.0687219	0.918954
BCKD_HUMAN	O14874	-0.384704	0.575025
BCL2_HUMAN	P10415	2.04803	0.528091
BCLF1_HUMAN	Q9NYF8	0.915922	0.416268
BCS1_HUMAN	Q9Y276	0.32627	0.672202
BD1L1_HUMAN	Q8NFC6	0.37342	0.459835
BDH_HUMAN	Q02338	-0.643215	0.335921
BDH2_HUMAN	Q9BUT1	1.02842	0.416268
BET1_HUMAN	O15155	-1.22684	0.231455
BET1L_HUMAN	Q9NYM9	-1.06824	0.461263
BGAL_HUMAN	P16278	-0.0236481	0.984164
BGH3_HUMAN	Q15582	-2.22746	0.0331951
BI1_HUMAN	P55061	-0.156585	0.855718
BI2L1_HUMAN	Q9UHR4	0.858176	0.701118
BICD2_HUMAN	Q8TD16	0.273801	0.856636
BID_HUMAN	P55957	-0.514755	0.647117
BIEA_HUMAN	P53004	0.407449	0.427771
BIG2_HUMAN	Q9Y6D5	0.982442	0.493478
BIN1_HUMAN	O00499	0.407449	0.796334
BIN3_HUMAN	Q9NQY0	1.90668	0.014679
BIP_HUMAN	P11021	-0.140282	0.761128
BIP_HUMAN	P11021	0.0698079	0.942473
BIRC5_HUMAN	O15392	-0.34177	0.870967
BIRC6_HUMAN	Q9NR09	0.407449	0.416268
BL1S1_HUMAN	P78537	0.585518	0.253604
BL1S2_HUMAN	Q6QNY1	-1.57959	0.406179
BLMH_HUMAN	Q13867	0.407449	0.416268
BLVRB_HUMAN	P30043	0.407449	0.416268
BMAL2_HUMAN	Q8WYA1	-0.882531	0.850533
BMS1_HUMAN	Q14692	0.540919	0.604305
BNI3L_HUMAN	O60238	0.0649787	0.951501
BOLA2_HUMAN	Q9H3K6	0.171031	0.805614
BOLA3_HUMAN	Q53S33	-1.9212	0.152638
BOP1_HUMAN	Q14137	0.516427	0.416268
BOREA_HUMAN	Q53HL2	-0.690765	0.630298
BORG5_HUMAN	Q00587	1.65414	0.422375
BPHL_HUMAN	Q86WA6	0.233264	0.928505
BPNT1_HUMAN	O95861	0.2285	0.629322
BPTF_HUMAN	Q12830	0.396774	0.419032
BRAT1_HUMAN	Q6PJG6	0.195783	0.625799
BRCC3_HUMAN	P46736	0.477012	0.416268
BRD3_HUMAN	Q15059	0.407449	0.416268
BRD4_HUMAN	O60885	0.0987999	0.882279
BRD4_HUMAN	O60885	-0.116514	0.942356
BRD8_HUMAN	Q9H0E9	1.51779	0.416268
BRE1A_HUMAN	Q5VTR2	0.336862	0.80681
BRE1B_HUMAN	O75150	-0.206938	0.902512
BRE1B_HUMAN	O75150	-0.76014	0.655168
BRI3B_HUMAN	Q8WY22	-0.533404	0.555664
BRK1_HUMAN	Q8WUW1	-0.629982	0.605011
BROX_HUMAN	Q5VW32	0.270301	0.691897
BRX1_HUMAN	Q8TDN6	0.792467	0.407593
BSCL2_HUMAN	Q96G97	-0.602608	0.774488
BST2_HUMAN	Q10589	-0.236315	0.746961
BT2A1_HUMAN	Q7KYR7	-1.05099	0.588267
BT3L4_HUMAN	Q96K17	0.781407	0.240214
BTAF1_HUMAN	O14981	0.530496	0.64888
BTF3_HUMAN	P20290	0.134787	0.868612
BUB1B_HUMAN	O60566	0.982068	0.452848
BUB3_HUMAN	O43684	-0.296344	0.490567
BUD23_HUMAN	O43709	-0.405777	0.74506
BUD31_HUMAN	P41223	0.0404752	0.969736
BYST_HUMAN	Q13895	-0.0912709	0.968907
BZW1_HUMAN	Q7L1Q6	0.84159	0.44745
BZW1_HUMAN	Q7L1Q6	-0.229618	0.769509
BZW2_HUMAN	Q9Y6E2	-1.30119	0.161273
C10_HUMAN	Q99622	1.00157	0.416268
C19L1_HUMAN	Q69YN2	0.564984	0.734178
C1GLC_HUMAN	Q96EU7	-1.75619	0.239498
C1GLT_HUMAN	Q9NS00	-2.82102	0.0586804
C1QBP_HUMAN	Q07021	-1.05856	0.229816
C1TC_HUMAN	P11586	0.359362	0.661335
C1TM_HUMAN	Q6UB35	-0.330251	0.695579
C2CD5_HUMAN	Q86YS7	1.19622	0.589524
C2D1A_HUMAN	Q6P1N0	0.26703	0.834887
C2D1B_HUMAN	Q5T0F9	0.407449	0.416268
C42S1_HUMAN	Q9NRR8	-4.83075	0.130926
C42S2_HUMAN	Q9NRR3	1.02447	0.793368
C43BP_HUMAN	Q9Y5P4	0.407449	0.416268
C560_HUMAN	Q99643	-2.61401	0.0920088
C56D2_HUMAN	O14569	-0.47832	0.464617
CA123_HUMAN	Q9NWV4	0.407449	0.416268
CA174_HUMAN	Q8IYL3	1.44648	0.298548
CA2D1_HUMAN	P54289	-1.50898	0.119373
CAB39_HUMAN	Q9Y376	-0.24058	0.780075
CAB45_HUMAN	Q9BRK5	-4.80597	0.0130197
CACP_HUMAN	P43155	0.188836	0.883515
CAD13_HUMAN	P55290	1.25961	0.0997589
CADH2_HUMAN	P19022	-0.15456	0.880664
CADM1_HUMAN	Q9BY67	0.712692	0.309999
CAF17_HUMAN	Q5T440	-0.516159	0.478359
CAF1A_HUMAN	Q13111	-0.883619	0.416268
CAF1B_HUMAN	Q13112	-0.0501177	0.943211
CAH12_HUMAN	O43570	0.800632	0.424718
CAH2_HUMAN	P00918	0.407449	0.416268
CALD1_HUMAN	Q05682	-0.172761	0.829232
CALM3_HUMAN	P0DP25	-0.0139127	0.99209
CALR_HUMAN	P27797	-0.474302	0.570099
CALU_HUMAN	O43852	-0.26056	0.633792
CALX_HUMAN	P27824	0.215972	0.805629
CAMLG_HUMAN	P49069	-0.81326	0.310764
CAMP2_HUMAN	Q08AD1	0.736019	0.308224
CAN1_HUMAN	P07384	0.440034	0.416268
CAN2_HUMAN	P17655	0.504608	0.416268
CANB1_HUMAN	P63098	0.792928	0.239498
CAND1_HUMAN	Q86VP6	0.526685	0.424718
CANT1_HUMAN	Q8WVQ1	-0.318312	0.424718
CAP1_HUMAN	Q01518	0.643351	0.416268
CAP2_HUMAN	P40123	0.543442	0.424718
CAPG_HUMAN	P40121	1.02519	0.484108
CAPR1_HUMAN	Q14444	-0.873973	0.19705
CAPZB_HUMAN	P47756	0.45102	0.499601
CAR19_HUMAN	Q96LW7	-0.483098	0.587381
CARF_HUMAN	Q9NXV6	0.948772	0.416268
CARM1_HUMAN	Q86X55	0.407449	0.416268
CASC4_HUMAN	Q6P4E1	-0.572737	0.469115
CASP_HUMAN	Q13948	0.721417	0.830918
CASP_HUMAN	Q13948	-0.257867	0.913967
CASP3_HUMAN	P42574	0.407449	0.416268
CASP6_HUMAN	P55212	0.580105	0.424718
CASPE_HUMAN	P31944	0.543442	0.83244
CATA_HUMAN	P04040	-1.05981	0.176023
CATB_HUMAN	P07858	0.407449	0.424718
CATC_HUMAN	P53634	-0.817497	0.667222
CATD_HUMAN	P07339	-0.0129029	0.978024
CATL1_HUMAN	P07711	1.63716	0.416268
CATZ_HUMAN	Q9UBR2	-0.532069	0.585174
CAV1_HUMAN	Q03135	0.325616	0.671952
CAV2_HUMAN	P51636	1.10955	0.646312
CAVN1_HUMAN	Q6NZI2	-0.0477691	0.932693
CAVN2_HUMAN	O95810	2.97503	0.0367073
CAVN3_HUMAN	Q969G5	-0.23518	0.644548
CAZA1_HUMAN	P52907	0.825293	0.342592
CAZA2_HUMAN	P47755	0.102779	0.951411
CAZA2_HUMAN	P47755	1.33059	0.593838
CBPA4_HUMAN	Q9UI42	-2.48068	0.0764233
CBPD_HUMAN	O75976	-0.737982	0.284762
CBPM_HUMAN	P14384	3.43764	0.0074162
CBR1_HUMAN	P16152	-0.690768	0.432124
CBR3_HUMAN	O75828	-0.170431	0.6769
CBR4_HUMAN	Q8N4T8	-1.06313	0.289318
CBS_HUMAN	P35520	0.407449	0.416268
CBX1_HUMAN	P83916	0.407449	0.416268
CBX3_HUMAN	Q13185	0.407449	0.416268
CBX5_HUMAN	P45973	0.407449	0.416268
CC033_HUMAN	Q6P1S2	-2.38756	0.489559
CC115_HUMAN	Q96NT0	-0.351706	0.833747
CC124_HUMAN	Q96CT7	0.321969	0.667072
CC127_HUMAN	Q96BQ5	0.497932	0.426131
CC134_HUMAN	Q9H6E4	-0.535227	0.416268
CC137_HUMAN	Q6PK04	-0.423078	0.590635
CC148_HUMAN	Q8NFR7	0.0849459	0.885436
CC167_HUMAN	Q9P0B6	-1.08446	0.0577048
CC178_HUMAN	Q5BJE1	1.76685	0.501414
CC50A_HUMAN	Q9NV96	-0.509183	0.30774
CC90B_HUMAN	Q9GZT6	0.0179916	0.988048
CCAR1_HUMAN	Q8IX12	0.0569552	0.920101
CCAR2_HUMAN	Q8N163	0.508056	0.629284
CCD12_HUMAN	Q8WUD4	0.407449	0.416268
CCD22_HUMAN	O60826	0.321927	0.707681
CCD25_HUMAN	Q86WR0	0.407449	0.416268
CCD43_HUMAN	Q96MW1	0.739324	0.238166
CCD47_HUMAN	Q96A33	-0.754408	0.0856629
CCD50_HUMAN	Q8IVM0	-1.73563	0.309098
CCD51_HUMAN	Q96ER9	0.620082	0.416268
CCD58_HUMAN	Q4VC31	1.21027	0.0480228
CCD86_HUMAN	Q9H6F5	0.428666	0.82323
CCD87_HUMAN	Q9NVE4	1.4091	0.48214
CCD93_HUMAN	Q567U6	-0.171714	0.946735
CCDC6_HUMAN	Q16204	0.182484	0.728438
CCHL_HUMAN	P53701	-0.109201	0.93362
CCNB1_HUMAN	P14635	0.426963	0.482588
CCNB2_HUMAN	O95067	0.201303	0.861465
CCNH_HUMAN	P51946	-0.05691	0.960005
CCNK_HUMAN	O75909	0.0987999	0.882279
CCNY_HUMAN	Q8ND76	0.0987187	0.75589
CCPG1_HUMAN	Q9ULG6	-1.73927	0.407593
CCS_HUMAN	O14618	0.407449	0.416268
CCZ1_HUMAN	P86791	-0.548823	0.826915
CD003_HUMAN	Q8WVX3	-0.561568	0.351319
CD109_HUMAN	Q6YHK3	0.154399	0.454607
CD11A_HUMAN	Q9UQ88	0.407449	0.548142
CD123_HUMAN	O75794	0.212652	0.720332
CD151_HUMAN	P48509	1.24855	0.515362
CD166_HUMAN	Q13740	0.534781	0.624156
CD276_HUMAN	Q5ZPR3	0.408804	0.48277
CD2AP_HUMAN	Q9Y5K6	-0.0128224	0.991368
CD2B2_HUMAN	O95400	0.440637	0.861781
CD320_HUMAN	Q9NPF0	-3.36121	0.0725165
CD44_HUMAN	P16070	-0.247336	0.729695
CD47_HUMAN	Q08722	0.480309	0.416268
CD59_HUMAN	P13987	0.276401	0.7174
CD63_HUMAN	P08962	-0.465923	0.464729
CD68_HUMAN	P34810	-0.194114	0.970961
CD70_HUMAN	P32970	0.715464	0.545764
CD81_HUMAN	P60033	0.417979	0.715366
CD9_HUMAN	P21926	2.41117	0.0260272
CD97_HUMAN	P48960	0.522632	0.238166
CD99_HUMAN	P14209	0.800704	0.192395
CDC16_HUMAN	Q13042	0.373144	0.689418
CDC23_HUMAN	Q9UJX2	0.469236	0.416268
CDC27_HUMAN	P30260	-0.195699	0.932528
CDC37_HUMAN	Q16543	0.407449	0.416268
CDC42_HUMAN	P60953	-0.022983	0.970189
CDC5L_HUMAN	Q99459	0.834847	0.710607
CDC73_HUMAN	Q6P1J9	0.454992	0.801221
CDCA2_HUMAN	Q69YH5	1.91788	0.250771
CDCA3_HUMAN	Q99618	1.70821	0.0424119
CDCA5_HUMAN	Q96FF9	1.63588	0.505445
CDCP1_HUMAN	Q9H5V8	1.25452	0.220946
CDD_HUMAN	P32320	2.12892	0.207132
CDIPT_HUMAN	O14735	-0.469019	0.416268
CDK1_HUMAN	P06493	0.56324	0.202165
CDK12_HUMAN	Q9NYV4	-0.1214	0.943211
CDK13_HUMAN	Q14004	-0.678239	0.761641
CDK2_HUMAN	P24941	-0.302999	0.581197
CDK4_HUMAN	P11802	0.407449	0.416268
CDK5_HUMAN	Q00535	0.939404	0.416268
CDK6_HUMAN	Q00534	0.407449	0.416268
CDK7_HUMAN	P50613	0.253542	0.502854
CDK9_HUMAN	P50750	0.477627	0.416268
CDKA1_HUMAN	O14519	-1.00121	0.619908
CDKAL_HUMAN	Q5VV42	-0.935624	0.288385
CDN2A_HUMAN	P42771	0.563877	0.219044
CDS2_HUMAN	O95674	0.560402	0.807522
CDV3_HUMAN	Q9UKY7	-1.08196	0.41286
CDY1_HUMAN	Q9Y6F8	0.11758	0.970888
CE022_HUMAN	Q49AR2	0.407449	0.416268
CE051_HUMAN	A6NDU8	0.836908	0.602407
CE170_HUMAN	Q5SW79	-0.089802	0.964605
CEBOS_HUMAN	A8MTT3	-0.0554019	0.974943
CEBPB_HUMAN	P17676	0.284799	0.928049
CEBPZ_HUMAN	Q03701	0.554023	0.678601
CELF1_HUMAN	Q92879	-1.0187	0.611797
CENPB_HUMAN	P07199	0.543442	0.424718
CENPE_HUMAN	Q02224	-0.0450618	0.990315
CENPF_HUMAN	P49454	-0.0323896	0.975753
CENPV_HUMAN	Q7Z7K6	0.431243	0.592316
CEP55_HUMAN	Q53EZ4	-1.40785	0.513096
CEP97_HUMAN	Q8IW35	0.543442	0.424718
CERS2_HUMAN	Q96G23	-0.577776	0.205395
CETN2_HUMAN	P41208	0.297201	0.644424
CF120_HUMAN	Q7Z4R8	-1.49516	0.424482
CF203_HUMAN	Q9P0P8	-3.8229	0.277924
CFA20_HUMAN	Q9Y6A4	0.936227	0.224142
CG050_HUMAN	Q9BRJ6	-0.580968	0.523476
CGAT2_HUMAN	Q8N6G5	-0.325353	0.886773
CGBP1_HUMAN	Q9UFW8	0.0617894	0.971677
CGT_HUMAN	Q16880	-2.10257	0.227071
CH033_HUMAN	Q9H7E9	2.13414	0.460166
CH059_HUMAN	Q8N0T1	0.944392	0.381556
CH082_HUMAN	Q6P1X6	-0.319264	0.537043
CH10_HUMAN	P61604	-0.598133	0.253854
CH60_HUMAN	P10809	-0.132027	0.692248
CHAP1_HUMAN	Q96JM3	-0.674452	0.643003
CHC10_HUMAN	Q8WYQ3	5.26747	0.0305556
CHCH1_HUMAN	Q96BP2	-1.99052	0.126245
CHCH2_HUMAN	Q9Y6H1	1.5756	0.163124
CHCH5_HUMAN	Q9BSY4	3.02246	0.125843
CHD1_HUMAN	O14646	0.407449	0.416268
CHD2_HUMAN	O14647	-0.877664	0.330445
CHD3_HUMAN	Q12873	0.664151	0.416268
CHD4_HUMAN	Q14839	-0.410344	0.803832
CHD7_HUMAN	Q9P2D1	0.267504	0.943132
CHDH_HUMAN	Q8NE62	3.57842	0.579633
CHERP_HUMAN	Q8IWX8	0.324817	0.521188
CHID1_HUMAN	Q9BWS9	0.0327709	0.99209
CHIP_HUMAN	Q9UNE7	-0.174118	0.792523
CHM1A_HUMAN	Q9HD42	0.671432	0.6769
CHM2A_HUMAN	O43633	0.69073	0.729928
CHM2B_HUMAN	Q9UQN3	0.0715428	0.923476
CHM4A_HUMAN	Q9BY43	0.589154	0.234818
CHM4B_HUMAN	Q9H444	0.020394	0.980431
CHMP3_HUMAN	Q9Y3E7	1.1716	0.389402
CHMP5_HUMAN	Q9NZZ3	0.402468	0.803832
CHMP6_HUMAN	Q96FZ7	-0.111411	0.943896
CHMP7_HUMAN	Q8WUX9	0.580105	0.424718
CHP1_HUMAN	Q99653	-0.0185335	0.981383
CHPF2_HUMAN	Q9P2E5	-1.17631	0.273255
CHPT1_HUMAN	Q8WUD6	-0.085442	0.962991
CHRC1_HUMAN	Q9NRG0	0.416575	0.416268
CHRD1_HUMAN	Q9UHD1	0.407449	0.424718
CHSP1_HUMAN	Q9Y2V2	0.839554	0.257925
CHSS1_HUMAN	Q86X52	-1.2957	0.416268
CHSS2_HUMAN	Q8IZ52	-2.14783	0.0130308
CHSS3_HUMAN	Q70JA7	-2.58016	0.00713346
CHSS3_HUMAN	Q70JA7	-1.58512	0.184529
CHST3_HUMAN	Q7LGC8	-1.77304	0.416268
CHSTB_HUMAN	Q9NPF2	-0.968579	0.284762
CHSTE_HUMAN	Q8NCH0	-1.18921	0.0943143
CHTOP_HUMAN	Q9Y3Y2	0.1862	0.717131
CHUR_HUMAN	Q8WUH1	0.407449	0.416268
CI114_HUMAN	Q5T280	-0.86009	0.437685
CIA30_HUMAN	Q9Y375	-2.54339	0.0139585
CIAO1_HUMAN	O76071	1.15928	0.2752
CIKS_HUMAN	O43734	-1.0717	0.419756
CIP4_HUMAN	Q15642	0.2898	0.579631
CIRBP_HUMAN	Q14011	-1.42779	0.129001
CISD1_HUMAN	Q9NZ45	-0.419339	0.629653
CISD2_HUMAN	Q8N5K1	-0.06229	0.824477
CISD3_HUMAN	P0C7P0	-0.101748	0.931731
CISY_HUMAN	O75390	-0.912844	0.416268
CK054_HUMAN	Q9H0W9	0.407449	0.416268
CK068_HUMAN	Q9H3H3	0.716963	0.424718
CK098_HUMAN	E9PRG8	3.38984	0.416268
CK5P1_HUMAN	Q96SZ6	0.341394	0.5333
CK5P3_HUMAN	Q96JB5	-0.95875	0.155326
CKAP2_HUMAN	Q8WWK9	1.11468	0.356005
CKAP4_HUMAN	Q07065	-1.26516	0.0433624
CKAP5_HUMAN	Q14008	0.430397	0.527608
CKLF6_HUMAN	Q9NX76	-0.138221	0.905865
CKS1_HUMAN	P61024	-0.311769	0.860526
CKS2_HUMAN	P33552	-0.348937	0.769567
CL043_HUMAN	Q96C57	1.37113	0.23113
CLAP1_HUMAN	Q7Z460	1.0625	0.321089
CLAP2_HUMAN	O75122	0.711554	0.416268
CLAP2_HUMAN	O75122	0.812491	0.573975
CLCA_HUMAN	P09496	-0.838322	0.611797
CLCB_HUMAN	P09497	-0.0716705	0.968496
CLCC1_HUMAN	Q96S66	-1.20008	0.359721
CLD1_HUMAN	O95832	0.5295	0.416268
CLD4_HUMAN	O14493	2.20112	0.423279
CLDN1_HUMAN	Q9NY35	2.31421	0.417763
CLGN_HUMAN	O14967	3.85658	0.00287729
CLH1_HUMAN	Q00610	0.106289	0.814578
CLH2_HUMAN	P53675	1.21574	0.604305
CLIC1_HUMAN	O00299	0.570158	0.279933
CLIC3_HUMAN	O95833	0.407449	0.416268
CLIC4_HUMAN	Q9Y696	0.370893	0.457396
CLIP1_HUMAN	P30622	0.407449	0.416268
CLMN_HUMAN	Q96JQ2	2.37114	0.103587
CLMP_HUMAN	Q9H6B4	-1.53079	0.68737
CLN6_HUMAN	Q9NWW5	0.830181	0.508332
CLP1L_HUMAN	Q96KA5	-0.720544	0.173339
CLPB_HUMAN	Q9H078	0.634599	0.14187
CLPP_HUMAN	Q16740	-1.00043	0.419756
CLPT1_HUMAN	O96005	-0.121962	0.882279
CLPX_HUMAN	O76031	-2.60285	0.0987075
CLU_HUMAN	O75153	0.407449	0.416268
CLUS_HUMAN	P10909	0.0296832	0.981383
CMBL_HUMAN	Q96DG6	0.407449	0.416268
CMC1_HUMAN	O75746	-2.27128	0.0255453
CMC2_HUMAN	Q9UJS0	-1.40653	0.0591934
CMS1_HUMAN	Q9BQ75	-0.0522505	0.952426
CMTD1_HUMAN	Q86VU5	-0.159241	0.881855
CMYA5_HUMAN	Q8N3K9	-2.08313	0.306317
CN37_HUMAN	P09543	-1.01242	0.0280919
CNBP_HUMAN	P62633	-0.925552	0.438466
CND1_HUMAN	Q15021	0.333622	0.744321
CND2_HUMAN	Q15003	0.361888	0.774465
CND3_HUMAN	Q9BPX3	0.130181	0.882279
CNDD3_HUMAN	P42695	0.100424	0.943331
CNDG2_HUMAN	Q86XI2	0.66298	0.829058
CNDH2_HUMAN	Q6IBW4	0.141681	0.971694
CNDP2_HUMAN	Q96KP4	0.407449	0.416268
CNIH1_HUMAN	O95406	-1.08226	0.419679
CNIH4_HUMAN	Q9P003	-1.83582	0.754161
CNN1_HUMAN	P51911	-4.05625	0.014679
CNN2_HUMAN	Q99439	-0.725524	0.396366
CNN3_HUMAN	Q15417	-0.29793	0.520315
CNNM3_HUMAN	Q8NE01	0.592327	0.424718
CNNM4_HUMAN	Q6P4Q7	3.18266	0.0339729
CNO10_HUMAN	Q9H9A5	0.536786	0.839438
CNOT1_HUMAN	A5YKK6	-0.260967	0.761128
CNOT2_HUMAN	Q9NZN8	-0.552801	0.779034
CNOT7_HUMAN	Q9UIV1	-0.357243	0.815466
CNOT9_HUMAN	Q92600	0.108006	0.839149
CNPY2_HUMAN	Q9Y2B0	0.446234	0.416268
CNPY3_HUMAN	Q9BT09	0.467849	0.52431
CNPY4_HUMAN	Q8N129	-0.182713	0.968907
CNST_HUMAN	Q6PJW8	-1.98014	0.529812
CNTLN_HUMAN	Q9NXG0	0.580105	0.410913
CNTP1_HUMAN	P78357	-0.370465	0.6769
CNTP3_HUMAN	Q9BZ76	1.69924	0.629322
CO040_HUMAN	Q8WUR7	-0.388793	0.881272
CO061_HUMAN	A6NNL5	-1.80421	0.277924
CO1A1_HUMAN	P02452	-4.99695	0.000281273
CO3_HUMAN	P01024	-2.06542	0.135436
CO3A1_HUMAN	P02461	-3.61648	0.014679
CO4A1_HUMAN	P02462	-0.81344	0.288385
CO4A2_HUMAN	P08572	0.133442	0.771796
CO4A4_HUMAN	P53420	0.145725	0.859827
CO5A1_HUMAN	P20908	-2.90482	0.0193624
CO6A1_HUMAN	P12109	-3.58992	0.161273
CO7A1_HUMAN	Q02388	-0.296231	0.726352
COA1_HUMAN	Q9GZY4	-0.85325	0.00335237
COA3_HUMAN	Q9Y2R0	-0.816462	0.249349
COA4_HUMAN	Q9NYJ1	0.49183	0.813914
COA6_HUMAN	Q5JTJ3	0.0823383	0.930575
COA7_HUMAN	Q96BR5	2.27649	0.0752975
COASY_HUMAN	Q13057	-0.0145668	0.99209
COCA1_HUMAN	Q99715	-2.13174	0.0430204
COF1_HUMAN	P23528	0.0576579	0.934326
COF2_HUMAN	Q9Y281	-0.555688	0.629262
COG4_HUMAN	Q9H9E3	0.155657	0.928263
COG5_HUMAN	Q9UP83	-1.43396	0.416268
COG6_HUMAN	Q9Y2V7	-1.48809	0.416268
COIA1_HUMAN	P39060	-2.60634	0.0781083
COIL_HUMAN	P38432	0.120996	0.883777
COMD1_HUMAN	Q8N668	1.23166	0.369161
COMD2_HUMAN	Q86X83	0.889751	0.312552
COMD3_HUMAN	Q9UBI1	-0.589201	0.705986
COMD4_HUMAN	Q9H0A8	0.777439	0.6769
COMD5_HUMAN	Q9GZQ3	1.138	0.416268
COMD6_HUMAN	Q7Z4G1	1.01165	0.430429
COMD7_HUMAN	Q86VX2	0.911313	0.654179
COMD8_HUMAN	Q9NX08	0.321568	0.720814
COMD9_HUMAN	Q9P000	0.113709	0.931438
COMDA_HUMAN	Q9Y6G5	1.52376	0.289994
COMT_HUMAN	P21964	-0.653807	0.416268
COPA_HUMAN	P53621	0.193381	0.8388
COPB_HUMAN	P53618	0.0141917	0.989186
COPB2_HUMAN	P35606	0.224123	0.870744
COPD_HUMAN	P48444	0.474928	0.575274
COPE_HUMAN	O14579	-0.262806	0.801416
COPG1_HUMAN	Q9Y678	-0.200839	0.884024
COPG2_HUMAN	Q9UBF2	0.267019	0.46022
COPZ1_HUMAN	P61923	0.179467	0.861781
COQ3_HUMAN	Q9NZJ6	0.0804468	0.953811
COQ4_HUMAN	Q9Y3A0	0.782603	0.774465
COQ5_HUMAN	Q5HYK3	0.226872	0.483496
COQ6_HUMAN	Q9Y2Z9	0.132584	0.829934
COQ7_HUMAN	Q99807	-1.30898	0.30231
COQ8A_HUMAN	Q8NI60	0.2285	0.737903
COQ8B_HUMAN	Q96D53	-0.42793	0.416268
COQ9_HUMAN	O75208	-1.3846	0.114713
COR1B_HUMAN	Q9BR76	0.380768	0.760133
COR1C_HUMAN	Q9ULV4	0.093558	0.94035
COR2A_HUMAN	Q92828	2.75231	0.00417258
COTL1_HUMAN	Q14019	-0.147659	0.727836
COX1_HUMAN	P00395	-3.93708	0.0038315
COX10_HUMAN	Q12887	-2.33299	0.00163844
COX11_HUMAN	Q9Y6N1	-2.7403	0.154529
COX14_HUMAN	Q96I36	0.264932	0.789897
COX15_HUMAN	Q7KZN9	0.0818495	0.884526
COX16_HUMAN	Q9P0S2	-0.458253	0.817379
COX17_HUMAN	Q14061	1.18413	0.440632
COX18_HUMAN	Q8N8Q8	-1.81948	0.307388
COX19_HUMAN	Q49B96	-3.80798	0.00036087
COX2_HUMAN	P00403	-6.55557	0.00066397
COX20_HUMAN	Q5RI15	-0.316146	0.612281
COX3_HUMAN	P00414	-2.6043	0.134004
COX41_HUMAN	P13073	-0.80203	0.308589
COX5A_HUMAN	P20674	-0.296846	0.589841
COX5B_HUMAN	P10606	-3.04033	0.0295237
COX6C_HUMAN	P09669	-1.64972	0.0617027
COX7R_HUMAN	O14548	-5.24769	0.000209268
COXM1_HUMAN	Q7Z7K0	-1.63504	0.271688
COXM2_HUMAN	Q9NRP2	0.303917	0.746932
CP062_HUMAN	Q7Z3J2	0.365893	0.881104
CP1B1_HUMAN	Q16678	-2.89844	0.0336571
CP20A_HUMAN	Q6UW02	2.03266	0.207132
CP2B6_HUMAN	P20813	-1.98	0.795154
CP2S1_HUMAN	Q96SQ9	4.36397	0.00134603
CP51A_HUMAN	Q16850	-0.646019	0.218192
CPIN1_HUMAN	Q6FI81	0.0728611	0.930682
CPNE1_HUMAN	Q99829	-1.34745	0.350928
CPNE3_HUMAN	O75131	1.34014	0.125843
CPNE8_HUMAN	Q86YQ8	-1.79413	0.416268
CPNE9_HUMAN	Q8IYJ1	0.761543	0.455024
CPNS1_HUMAN	P04632	1.00579	0.0280919
CPPED_HUMAN	Q9BRF8	0.407449	0.416268
CPSF1_HUMAN	Q10570	0.407449	0.416268
CPSF2_HUMAN	Q9P2I0	0.407449	0.416268
CPSF3_HUMAN	Q9UKF6	-1.67385	0.349007
CPSF4_HUMAN	O95639	0.543442	0.424718
CPSF5_HUMAN	O43809	-0.0271283	0.984623
CPSF6_HUMAN	Q16630	-0.13787	0.918954
CPSF7_HUMAN	Q8N684	0.407449	0.416268
CPSM_HUMAN	P31327	2.24611	0.384779
CPT1A_HUMAN	P50416	1.26533	0.144404
CPT2_HUMAN	P23786	-0.200043	0.777498
CQ062_HUMAN	Q9BQA9	-1.69873	0.416268
CRBG1_HUMAN	Q9Y4K1	-2.63344	0.0827089
CREB1_HUMAN	P16220	-0.442602	0.6769
CREG1_HUMAN	O75629	-2.1191	0.416268
CRIM1_HUMAN	Q9NZV1	0.0191765	0.995162
CRIP1_HUMAN	P50238	0.580105	0.424718
CRIP2_HUMAN	P52943	-0.468557	0.499601
CRK_HUMAN	P46108	0.407449	0.416268
CRKL_HUMAN	P46109	0.69305	0.478635
CRNL1_HUMAN	Q9BZJ0	-1.26687	0.416268
CRNN_HUMAN	Q9UBG3	0.580105	0.637104
CROCC_HUMAN	Q5TZA2	1.10164	0.20334
CRTAP_HUMAN	O75718	-0.858723	0.413847
CRTP1_HUMAN	A8MQ03	1.97279	0.111453
CRYAB_HUMAN	P02511	0.407449	0.424765
CS025_HUMAN	Q9UFG5	-0.348816	0.726352
CSDE1_HUMAN	O75534	-1.02655	0.265985
CSK_HUMAN	P41240	0.985353	0.317087
CSK21_HUMAN	P68400	0.418734	0.499601
CSK22_HUMAN	P19784	-0.196913	0.764307
CSK2B_HUMAN	P67870	0.545699	0.609047
CSKP_HUMAN	O14936	0.695867	0.416268
CSMT1_HUMAN	Q4G0I0	-1.44266	0.00884693
CSN1_HUMAN	Q13098	0.407449	0.424718
CSN2_HUMAN	P61201	0.407449	0.416268
CSN3_HUMAN	Q9UNS2	0.407449	0.416268
CSN4_HUMAN	Q9BT78	0.407449	0.416268
CSN5_HUMAN	Q92905	0.467357	0.356005
CSN6_HUMAN	Q7L5N1	0.407449	0.416268
CSN7A_HUMAN	Q9UBW8	0.407449	0.416268
CSN7B_HUMAN	Q9H9Q2	0.407449	0.416268
CSN8_HUMAN	Q99627	0.407449	0.569875
CSPG4_HUMAN	Q6UVK1	-0.804246	0.72809
CSRP1_HUMAN	P21291	0.181993	0.915177
CSRP2_HUMAN	Q16527	0.967304	0.507601
CSTF1_HUMAN	Q05048	0.890393	0.64888
CSTF2_HUMAN	P33240	0.542393	0.416268
CSTF3_HUMAN	Q12996	1.07313	0.592316
CSTFT_HUMAN	Q9H0L4	0.407449	0.416268
CSTN1_HUMAN	O94985	-1.61181	0.529812
CT027_HUMAN	Q9GZN8	0.0987999	0.882279
CTBL1_HUMAN	Q8WYA6	0.407449	0.416268
CTBP1_HUMAN	Q13363	0.407449	0.416268
CTBP2_HUMAN	P56545	0.407449	0.416268
CTBP2_HUMAN	P56545	0.0510633	0.962373
CTCF_HUMAN	P49711	0.940898	0.6769
CTDS1_HUMAN	Q9GZU7	1.24288	0.127562
CTF18_HUMAN	Q8WVB6	0.687581	0.816543
CTGE5_HUMAN	O15320	-0.278192	0.630742
CTGF_HUMAN	P29279	2.13172	0.312518
CTL1_HUMAN	Q8WWI5	2.61055	0.0744416
CTL2_HUMAN	Q8IWA5	1.25432	0.331609
CTNA1_HUMAN	P35221	-0.239998	0.866266
CTNA2_HUMAN	P26232	-0.205669	0.943132
CTNB1_HUMAN	P35222	-0.933612	0.307402
CTND1_HUMAN	O60716	-0.0556645	0.963895
CTR1_HUMAN	P30825	0.269576	0.602407
CTR9_HUMAN	Q6PD62	0.407449	0.796075
CTRO_HUMAN	O14578	-0.859866	0.661787
CUL1_HUMAN	Q13616	0.00859506	0.995653
CUL2_HUMAN	Q13617	0.0914744	0.920101
CUL3_HUMAN	Q13618	0.399172	0.801416
CUL4A_HUMAN	Q13619	0.407449	0.612253
CUL4B_HUMAN	Q13620	0.630172	0.4691
CUL5_HUMAN	Q93034	-0.723433	0.794852
CUTA_HUMAN	O60888	0.1313	0.942579
CUTC_HUMAN	Q9NTM9	-0.925968	0.601807
CUX1_HUMAN	P39880	1.1396	0.715629
CWC15_HUMAN	Q9P013	0.407449	0.416268
CWC22_HUMAN	Q9HCG8	0.228112	0.715017
CWC27_HUMAN	Q6UX04	0.407449	0.416268
CX056_HUMAN	Q9H5V9	0.0547442	0.981383
CX6A1_HUMAN	P12074	-5.00659	0.0814331
CX6B1_HUMAN	P14854	-2.61618	0.0190114
CX7A2_HUMAN	P14406	-3.46927	0.00241296
CXA1_HUMAN	P17302	-3.24907	0.0331951
CXAR_HUMAN	P78310	-0.160288	0.859827
CXCR4_HUMAN	P61073	0.761856	0.416268
CY1_HUMAN	P08574	0.421872	0.629322
CYB_HUMAN	P00156	-4.74663	0.0446855
CYB5_HUMAN	P00167	-0.649187	0.339521
CYB5B_HUMAN	O43169	-0.968568	0.251976
CYBP_HUMAN	Q9HB71	-0.536217	0.486845
CYC_HUMAN	P99999	0.318736	0.817306
CYFP1_HUMAN	Q7L576	0.356552	0.72809
CYFP2_HUMAN	Q96F07	1.06511	0.460244
CYR61_HUMAN	O00622	0.597696	0.575025
CYTB_HUMAN	P04080	0.835697	0.121616
CYTM1_HUMAN	Q9H1C7	1.44378	0.305324
CYTSA_HUMAN	Q69YQ0	0.963263	0.48277
CYTSB_HUMAN	Q5M775	0.204507	0.867121
D19L1_HUMAN	Q2PZI1	-0.799052	0.408467
D39U1_HUMAN	Q9NRG7	-1.61477	0.421371
DAAF5_HUMAN	Q86Y56	0.284375	0.590635
DAAM1_HUMAN	Q9Y4D1	1.42353	0.416268
DAB2_HUMAN	P98082	0.0686828	0.981383
DAD1_HUMAN	P61803	-0.954695	0.0601998
DAF_HUMAN	P08174	0.983758	0.257925
DAG1_HUMAN	Q14118	0.244272	0.646312
DAPK1_HUMAN	P53355	0.730237	0.292725
DAPK3_HUMAN	O43293	0.118828	0.962373
DAXX_HUMAN	Q9UER7	0.407449	0.416268
DAZP1_HUMAN	Q96EP5	-0.0406528	0.977409
DBLOH_HUMAN	Q9NR28	0.94088	0.374657
DBNL_HUMAN	Q9UJU6	0.407449	0.704698
DBR1_HUMAN	Q9UK59	0.543377	0.670812
DC1I2_HUMAN	Q13409	0.829612	0.194895
DC1L1_HUMAN	Q9Y6G9	0.0445802	0.950801
DC1L2_HUMAN	O43237	0.889847	0.185478
DCA13_HUMAN	Q9NV06	-0.718515	0.629322
DCAF1_HUMAN	Q9Y4B6	0.407449	0.589841
DCAF7_HUMAN	P61962	-0.214822	0.799935
DCAKD_HUMAN	Q8WVC6	-1.36176	0.149811
DCBD1_HUMAN	Q8N8Z6	-0.711178	0.78132
DCBD2_HUMAN	Q96PD2	-1.91718	0.24622
DCD_HUMAN	P81605	0.340809	0.905233
DCK_HUMAN	P27707	0.543442	0.424718
DCMC_HUMAN	O95822	-3.72478	0.0436137
DCNL1_HUMAN	Q96GG9	0.407449	0.416268
DCNL5_HUMAN	Q9BTE7	0.180942	0.860526
DCPS_HUMAN	Q96C86	0.407449	0.416268
DCTD_HUMAN	P32321	0.407449	0.416268
DCTN1_HUMAN	Q14203	0.387301	0.802073
DCTN2_HUMAN	Q13561	1.23228	0.416268
DCTN3_HUMAN	O75935	0.16489	0.94035
DCTN4_HUMAN	Q9UJW0	0.430177	0.569875
DCTN5_HUMAN	Q9BTE1	-0.0452373	0.984623
DCTN6_HUMAN	O00399	0.75723	0.726352
DCTP1_HUMAN	Q9H773	0.407449	0.416268
DCUP_HUMAN	P06132	0.407449	0.416268
DCXR_HUMAN	Q7Z4W1	-0.25815	0.7917
DD19A_HUMAN	Q9NUU7	0.315071	0.535479
DDA1_HUMAN	Q9BW61	0.407449	0.416268
DDAH1_HUMAN	O94760	0.418691	0.421371
DDAH1_HUMAN	O94760	-0.142741	0.946735
DDAH2_HUMAN	O95865	0.407449	0.416268
DDB1_HUMAN	Q16531	0.653846	0.42688
DDB2_HUMAN	Q92466	0.748384	0.424718
DDRGK_HUMAN	Q96HY6	-0.826009	0.133214
DDX1_HUMAN	Q92499	1.0656	0.324322
DDX10_HUMAN	Q13206	-0.234332	0.903134
DDX17_HUMAN	Q92841	0.240794	0.560483
DDX18_HUMAN	Q9NVP1	0.0188404	0.991925
DDX20_HUMAN	Q9UHI6	0.473176	0.696393
DDX21_HUMAN	Q9NR30	-1.17784	0.360317
DDX23_HUMAN	Q9BUQ8	0.156536	0.946735
DDX24_HUMAN	Q9GZR7	-0.592236	0.602407
DDX27_HUMAN	Q96GQ7	0.141142	0.952951
DDX28_HUMAN	Q9NUL7	-0.863555	0.224549
DDX31_HUMAN	Q9H8H2	1.12154	0.287684
DDX3X_HUMAN	O00571	0.174843	0.667072
DDX3X_HUMAN	O00571	-0.567707	0.667072
DDX3Y_HUMAN	O15523	0.407449	0.63471
DDX41_HUMAN	Q9UJV9	-0.154894	0.970961
DDX42_HUMAN	Q86XP3	0.407449	0.416268
DDX46_HUMAN	Q7L014	0.407449	0.416268
DDX47_HUMAN	Q9H0S4	0.285679	0.726352
DDX49_HUMAN	Q9Y6V7	-0.325536	0.809995
DDX5_HUMAN	P17844	-0.381069	0.719216
DDX50_HUMAN	Q9BQ39	-1.0664	0.424718
DDX51_HUMAN	Q8N8A6	1.33292	0.587105
DDX52_HUMAN	Q9Y2R4	-2.65868	0.00430747
DDX54_HUMAN	Q8TDD1	0.512733	0.688168
DDX55_HUMAN	Q8NHQ9	-0.314192	0.896181
DDX56_HUMAN	Q9NY93	-0.507493	0.611797
DDX58_HUMAN	O95786	0.0987999	0.882279
DDX6_HUMAN	P26196	0.322779	0.416268
DECR_HUMAN	Q16698	0.323112	0.75114
DECR2_HUMAN	Q9NUI1	-0.418945	0.540367
DEFM_HUMAN	Q9HBH1	0.00287057	0.996406
DEGS1_HUMAN	O15121	-0.728239	0.510177
DEK_HUMAN	P35659	0.43609	0.661274
DEN4C_HUMAN	Q5VZ89	0.649635	0.483482
DENR_HUMAN	O43583	0.121593	0.800719
DEOC_HUMAN	Q9Y315	0.407449	0.593838
DERL1_HUMAN	Q9BUN8	0.113804	0.860526
DERL2_HUMAN	Q9GZP9	-0.452778	0.177702
DESI2_HUMAN	Q9BSY9	-0.729611	0.803832
DESP_HUMAN	P15924	0.407449	0.416268
DEST_HUMAN	P60981	0.0558249	0.943211
DFFA_HUMAN	O00273	0.407449	0.416268
DGAT1_HUMAN	O75907	1.07457	0.130926
DGKA_HUMAN	P23743	0.407449	0.604266
DGKE_HUMAN	P52429	-0.732404	0.648182
DGLB_HUMAN	Q8NCG7	-0.91324	0.4691
DGUOK_HUMAN	Q16854	1.41097	0.554859
DHB11_HUMAN	Q8NBQ5	-0.232452	0.779034
DHB12_HUMAN	Q53GQ0	-0.77637	0.321089
DHB4_HUMAN	P51659	-0.0730697	0.868612
DHB7_HUMAN	P56937	-2.35767	0.121125
DHB8_HUMAN	Q92506	-0.835918	0.424482
DHC24_HUMAN	Q15392	-0.451459	0.688422
DHCR7_HUMAN	Q9UBM7	-1.33606	0.18496
DHDDS_HUMAN	Q86SQ9	-2.1778	0.0158905
DHE3_HUMAN	P00367	-0.427307	0.593662
DHPR_HUMAN	P09417	-1.50704	0.416268
DHRS1_HUMAN	Q96LJ7	-0.0266637	0.980957
DHRS2_HUMAN	Q13268	-5.03736	0.00713346
DHRS4_HUMAN	Q9BTZ2	0.269848	0.707357
DHRS7_HUMAN	Q9Y394	-0.337098	0.504517
DHSD_HUMAN	O14521	-2.22417	0.174713
DHSO_HUMAN	Q00796	-0.721581	0.416268
DHTK1_HUMAN	Q96HY7	-1.44766	0.424213
DHX15_HUMAN	O43143	0.290952	0.75365
DHX16_HUMAN	O60231	0.611878	0.663852
DHX29_HUMAN	Q7Z478	0.418655	0.416268
DHX30_HUMAN	Q7L2E3	-0.092403	0.882919
DHX36_HUMAN	Q9H2U1	-0.60453	0.386095
DHX37_HUMAN	Q8IY37	-0.187685	0.907334
DHX57_HUMAN	Q6P158	0.336993	0.840238
DHX8_HUMAN	Q14562	0.407449	0.416268
DHX9_HUMAN	Q08211	0.318006	0.722913
DHYS_HUMAN	P49366	0.407449	0.416268
DIA1_HUMAN	Q8NDZ4	-1.20768	0.154831
DIAP1_HUMAN	O60610	0.924869	0.289094
DIAP2_HUMAN	O60879	-2.00952	0.277924
DIAP3_HUMAN	Q9NSV4	0.493909	0.71878
DIC_HUMAN	Q9UBX3	-1.0031	0.246503
DIDO1_HUMAN	Q9BTC0	0.797315	0.430953
DIEXF_HUMAN	Q68CQ4	0.385083	0.423404
DIM1_HUMAN	Q9UNQ2	0.40402	0.833747
DIP2B_HUMAN	Q9P265	1.08577	0.416268
DJB11_HUMAN	Q9UBS4	-0.702975	0.204152
DJB12_HUMAN	Q9NXW2	-1.20716	0.175852
DJB14_HUMAN	Q8TBM8	-0.879988	0.158031
DJC10_HUMAN	Q8IXB1	-0.0493576	0.928263
DJC11_HUMAN	Q9NVH1	0.635127	0.416268
DJC13_HUMAN	O75165	-0.338834	0.718808
DJC14_HUMAN	Q6Y2X3	-3.16551	0.250738
DJC15_HUMAN	Q9Y5T4	0.696246	0.127562
DJC16_HUMAN	Q9Y2G8	0.149788	0.629322
DJC21_HUMAN	Q5F1R6	-0.410687	0.822501
DJC30_HUMAN	Q96LL9	-1.08677	0.415039
DKC1_HUMAN	O60832	0.426289	0.822501
DLDH_HUMAN	P09622	-1.06261	0.0752975
DLG1_HUMAN	Q12959	1.29849	0.0400573
DLP1_HUMAN	Q86YH6	-0.975783	0.417763
DLRB1_HUMAN	Q9NP97	0.723786	0.539057
DMAC1_HUMAN	Q96GE9	-0.102587	0.882279
DMAC2_HUMAN	Q9NW81	0.387676	0.417144
DMAP1_HUMAN	Q9NPF5	-1.4161	0.554258
DMD_HUMAN	P11532	0.563612	0.754126
DNA2_HUMAN	P51530	1.51935	0.486371
DNJA1_HUMAN	P31689	-0.498301	0.288385
DNJA2_HUMAN	O60884	0.167095	0.725837
DNJA3_HUMAN	Q96EY1	-0.845637	0.1719
DNJB1_HUMAN	P25685	0.235959	0.820369
DNJB4_HUMAN	Q9UDY4	0.111048	0.960204
DNJC1_HUMAN	Q96KC8	0.326523	0.763256
DNJC2_HUMAN	Q99543	-0.142627	0.926902
DNJC3_HUMAN	Q13217	-1.95258	0.416268
DNJC5_HUMAN	Q9H3Z4	-0.287568	0.509684
DNJC7_HUMAN	Q99615	0.0232482	0.948613
DNJC8_HUMAN	O75937	0.256237	0.915334
DNJC9_HUMAN	Q8WXX5	0.320591	0.568747
DNLI1_HUMAN	P18858	0.433596	0.554381
DNLI3_HUMAN	P49916	0.86505	0.579653
DNLI4_HUMAN	P49917	1.19539	0.424718
DNLZ_HUMAN	Q5SXM8	0.926862	0.30774
DNM1L_HUMAN	O00429	0.505133	0.482337
DNMBP_HUMAN	Q6XZF7	0.401437	0.737309
DNMT1_HUMAN	P26358	-0.419436	0.673905
DNPEP_HUMAN	Q9ULA0	0.580105	0.424718
DNPH1_HUMAN	O43598	0.81456	0.317087
DNS2A_HUMAN	O00115	-0.584041	0.824468
DNSL1_HUMAN	P49184	0.79285	0.604266
DOC10_HUMAN	Q96BY6	-0.493032	0.213356
DOC11_HUMAN	Q5JSL3	1.23979	0.416268
DOCK1_HUMAN	Q14185	1.53118	0.629322
DOCK5_HUMAN	Q9H7D0	2.31561	0.202165
DOCK7_HUMAN	Q96N67	-0.0256774	0.991421
DOCK9_HUMAN	Q9BZ29	3.45321	0.108727
DOHH_HUMAN	Q9BU89	0.407449	0.416268
DOLK_HUMAN	Q9UPQ8	-0.581741	0.486932
DOPD_HUMAN	P30046	0.460154	0.416268
DP13A_HUMAN	Q9UKG1	0.407449	0.416268
DPCD_HUMAN	Q9BVM2	0.798664	0.243562
DPH5_HUMAN	Q9H2P9	0.76847	0.415715
DPM1_HUMAN	O60762	-0.281764	0.689756
DPM3_HUMAN	Q9P2X0	-0.452682	0.288622
DPOA2_HUMAN	Q14181	0.108851	0.906978
DPOD1_HUMAN	P28340	1.22062	0.416268
DPOD2_HUMAN	P49005	1.01427	0.63471
DPOD3_HUMAN	Q15054	1.23312	0.416268
DPOE1_HUMAN	Q07864	-0.0628538	0.970961
DPOE3_HUMAN	Q9NRF9	0.523082	0.391089
DPOE4_HUMAN	Q9NR33	0.407449	0.416268
DPOG1_HUMAN	P54098	-1.44618	0.324322
DPOG2_HUMAN	Q9UHN1	-0.430498	0.839438
DPOLA_HUMAN	P09884	0.407449	0.416268
DPP2_HUMAN	Q9UHL4	0.944215	0.430498
DPP3_HUMAN	Q9NY33	0.407449	0.416268
DPP8_HUMAN	Q6V1X1	0.580105	0.424718
DPP9_HUMAN	Q86TI2	0.543442	0.424718
DPY30_HUMAN	Q9C005	0.181017	0.942816
DPYL1_HUMAN	Q14194	0.407449	0.416268
DPYL2_HUMAN	Q16555	0.407449	0.416268
DPYL3_HUMAN	Q14195	0.671212	0.167363
DREB_HUMAN	Q16643	0.148147	0.90409
DRG1_HUMAN	Q9Y295	0.471852	0.422375
DRG2_HUMAN	P55039	0.407449	0.655202
DRS7B_HUMAN	Q6IAN0	-1.17345	0.0348729
DSCR3_HUMAN	O14972	-0.306078	0.829934
DSE_HUMAN	Q9UL01	-2.44442	0.287984
DSEL_HUMAN	Q8IZU8	-1.44363	0.121125
DSG2_HUMAN	Q14126	0.576912	0.416268
DSRAD_HUMAN	P55265	-0.215492	0.719291
DTD1_HUMAN	Q8TEA8	-0.212262	0.854176
DUS12_HUMAN	Q9UNI6	0.580105	0.424718
DUS23_HUMAN	Q9BVJ7	0.0128578	0.981383
DUS3_HUMAN	P51452	0.407449	0.416268
DUS3L_HUMAN	Q96G46	0.407449	0.416268
DUT_HUMAN	P33316	-0.00418925	0.995162
DX39A_HUMAN	O00148	0.407449	0.416268
DX39A_HUMAN	O00148	0.621829	0.416268
DX39B_HUMAN	Q13838	0.407449	0.416268
DYH2_HUMAN	Q9P225	0.182573	0.942473
DYHC1_HUMAN	Q14204	0.435826	0.529154
DYHC2_HUMAN	Q8NCM8	1.38131	0.421048
DYL1_HUMAN	P63167	-0.484496	0.646852
DYL2_HUMAN	Q96FJ2	-0.0273512	0.994604
DYLT1_HUMAN	P63172	1.11848	0.257379
DYN2_HUMAN	P50570	0.426343	0.424718
DYR_HUMAN	P00374	0.509723	0.416268
DYST_HUMAN	Q03001	-0.383488	0.593812
E2AK2_HUMAN	P19525	0.487939	0.330247
E2AK4_HUMAN	Q9P2K8	0.632873	0.416268
E41L1_HUMAN	Q9H4G0	3.50015	0.00173813
E41L2_HUMAN	O43491	0.547348	0.557487
EAA1_HUMAN	P43003	0.93964	0.632493
EAF6_HUMAN	Q9HAF1	0.279596	0.670434
EBP_HUMAN	Q15125	0.0531581	0.952951
EBP2_HUMAN	Q99848	1.11417	0.241664
ECD_HUMAN	O95905	0.729798	0.794756
ECE1_HUMAN	P42892	0.401198	0.279933
ECH1_HUMAN	Q13011	0.319341	0.728399
ECHA_HUMAN	P40939	0.152192	0.804486
ECHB_HUMAN	P55084	-0.0108012	0.991368
ECHD1_HUMAN	Q9NTX5	-3.22854	0.0513218
ECHD3_HUMAN	Q96DC8	0.500245	0.882279
ECHM_HUMAN	P30084	-0.0825229	0.945657
ECI1_HUMAN	P42126	0.376109	0.741766
ECI2_HUMAN	O75521	0.399168	0.46273
ECM29_HUMAN	Q5VYK3	1.93037	0.00884693
ECSIT_HUMAN	Q9BQ95	-3.03224	0.0017035
EDC3_HUMAN	Q96F86	0.974678	0.598319
EDC4_HUMAN	Q6P2E9	0.570416	0.733456
EDEM3_HUMAN	Q9BZQ6	-0.788988	0.395717
EDF1_HUMAN	O60869	0.0675321	0.971677
EDIL3_HUMAN	O43854	0.823122	0.284866
EDRF1_HUMAN	Q3B7T1	-0.360603	0.563349
EEA1_HUMAN	Q15075	0.407449	0.416268
EF1A1_HUMAN	P68104	-0.40833	0.271688
EF1A2_HUMAN	Q05639	-4.92198	0.00449589
EF1B_HUMAN	P24534	0.582623	0.513623
EF1D_HUMAN	P29692	-0.14096	0.882279
EF1G_HUMAN	P26641	-0.115394	0.915177
EF2_HUMAN	P13639	-1.47112	0.134842
EFCB1_HUMAN	Q9HAE3	-0.630354	0.642015
EFCB6_HUMAN	Q5THR3	-1.36427	0.755469
EFGM_HUMAN	Q96RP9	0.13896	0.86342
EFHD2_HUMAN	Q96C19	0.724367	0.238147
EFL1_HUMAN	Q7Z2Z2	0.407449	0.416268
EFR3A_HUMAN	Q14156	-1.60047	0.42297
EFTS_HUMAN	P43897	-0.542887	0.421907
EFTU_HUMAN	P49411	-0.624011	0.416268
EGFR_HUMAN	P00533	-0.9028	0.196178
EGLN_HUMAN	P17813	-1.75663	0.0183392
EH1L1_HUMAN	Q8N3D4	0.543442	0.424718
EHD1_HUMAN	Q9H4M9	1.0746	0.0502474
EHD2_HUMAN	Q9NZN4	0.0702956	0.946735
EHD4_HUMAN	Q9H223	0.749325	0.229518
EHMT2_HUMAN	Q96KQ7	-0.387779	0.859573
EI24_HUMAN	O14681	-0.476771	0.416268
EI2BA_HUMAN	Q14232	0.69713	0.124099
EI2BB_HUMAN	P49770	-0.267784	0.778011
EI2BD_HUMAN	Q9UI10	0.943426	0.416268
EI2BE_HUMAN	Q13144	0.734149	0.416268
EI2BG_HUMAN	Q9NR50	1.78315	0.176069
EIF1_HUMAN	P41567	-0.346433	0.736976
EIF1B_HUMAN	O60739	0.398013	0.831521
EIF2A_HUMAN	Q9BY44	1.09261	0.416268
EIF2D_HUMAN	P41214	-0.0789207	0.967247
EIF3A_HUMAN	Q14152	0.243194	0.736976
EIF3B_HUMAN	P55884	0.407449	0.671641
EIF3C_HUMAN	Q99613	0.388628	0.718471
EIF3D_HUMAN	O15371	0.523506	0.424718
EIF3E_HUMAN	P60228	0.395252	0.730161
EIF3F_HUMAN	O00303	0.496566	0.479828
EIF3G_HUMAN	O75821	0.066863	0.946735
EIF3H_HUMAN	O15372	0.464476	0.788447
EIF3I_HUMAN	Q13347	0.353362	0.623521
EIF3J_HUMAN	O75822	0.0676645	0.959783
EIF3K_HUMAN	Q9UBQ5	0.599747	0.705986
EIF3L_HUMAN	Q9Y262	0.55554	0.444124
EIF3M_HUMAN	Q7L2H7	0.407449	0.742926
ELAV1_HUMAN	Q15717	-0.582514	0.416268
ELMD2_HUMAN	Q8IZ81	-0.691094	0.552115
ELMO2_HUMAN	Q96JJ3	2.48969	0.324322
ELOA1_HUMAN	Q14241	0.167253	0.915334
ELOB_HUMAN	Q15370	-0.00444491	0.994657
ELOC_HUMAN	Q15369	0.490232	0.0730755
ELOV1_HUMAN	Q9BW60	-1.36796	0.298917
ELOV2_HUMAN	Q9NXB9	-2.837	0.0197383
ELOV5_HUMAN	Q9NYP7	-1.61358	0.229816
ELP1_HUMAN	O95163	1.04256	0.455806
ELP2_HUMAN	Q6IA86	0.0820063	0.956337
ELYS_HUMAN	Q8WYP5	-0.692577	0.352946
EMAL4_HUMAN	Q9HC35	0.856967	0.416268
EMB_HUMAN	Q6PCB8	1.2888	0.384239
EMC1_HUMAN	Q8N766	-0.191409	0.790424
EMC10_HUMAN	Q5UCC4	-0.0754383	0.92212
EMC2_HUMAN	Q15006	0.0566046	0.943211
EMC3_HUMAN	Q9P0I2	-0.00284819	0.996406
EMC4_HUMAN	Q5J8M3	-0.0129184	0.981383
EMC6_HUMAN	Q9BV81	-0.134479	0.887377
EMC7_HUMAN	Q9NPA0	-0.372517	0.317087
EMC8_HUMAN	O43402	0.475878	0.811046
EMC9_HUMAN	Q9Y3B6	-1.11032	0.152413
EMD_HUMAN	P50402	0.030642	0.961804
EMRE_HUMAN	Q9H4I9	-0.402693	0.728179
ENAH_HUMAN	Q8N8S7	0.3419	0.556886
ENOA_HUMAN	P06733	1.07653	0.199603
ENOB_HUMAN	P13929	0.407449	0.416268
ENOG_HUMAN	P09104	0.0987999	0.953555
ENOPH_HUMAN	Q9UHY7	0.407449	0.416268
ENPL_HUMAN	P14625	-0.18954	0.857578
ENPP1_HUMAN	P22413	2.93711	0.23759
ENSA_HUMAN	O43768	-0.362134	0.416268
ENY2_HUMAN	Q9NPA8	-0.572203	0.667968
EP300_HUMAN	Q09472	0.43522	0.94035
EP400_HUMAN	Q96L91	0.543442	0.424718
EPCR_HUMAN	Q9UNN8	-2.53916	0.0101996
EPDR1_HUMAN	Q9UM22	0.407449	0.831464
EPG5_HUMAN	Q9HCE0	-0.195792	0.914644
EPHA2_HUMAN	P29317	1.10762	0.124099
EPHA3_HUMAN	P29320	-3.09339	0.071442
EPHA3_HUMAN	P29320	-3.76776	0.021101
EPHA7_HUMAN	Q15375	-2.80339	0.017458
EPHA7_HUMAN	Q15375	-3.99796	0.0239354
EPHB2_HUMAN	P29323	-0.654009	0.621522
EPHB4_HUMAN	P54760	-0.724674	0.576014
EPIPL_HUMAN	P58107	0.407449	0.416268
EPMIP_HUMAN	Q7L775	-0.203831	0.92578
EPN1_HUMAN	Q9Y6I3	-0.780046	0.416268
EPN2_HUMAN	O95208	-0.81099	0.769567
EPN4_HUMAN	Q14677	0.647666	0.719492
EPS15_HUMAN	P42566	1.10537	0.56905
EPS8_HUMAN	Q12929	-0.699527	0.416125
EPT1_HUMAN	Q9C0D9	-0.216284	0.833747
ERAL1_HUMAN	O75616	-0.954268	0.277573
ERAP1_HUMAN	Q9NZ08	2.05845	0.156272
ERBB2_HUMAN	P04626	0.149646	0.88897
ERBIN_HUMAN	Q96RT1	-0.0349097	0.959524
ERC2_HUMAN	O15083	0.803005	0.671813
ERCC2_HUMAN	P18074	0.67919	0.788187
ERCC3_HUMAN	P19447	0.464368	0.536697
ERCC5_HUMAN	P28715	1.12981	0.407593
ERD21_HUMAN	P24390	0.152444	0.851439
ERD22_HUMAN	P33947	-3.33863	0.513796
ERD23_HUMAN	O43731	-1.2966	0.416332
ERF1_HUMAN	P62495	-0.511303	0.361059
ERF3A_HUMAN	P15170	0.407449	0.416268
ERF3B_HUMAN	Q8IYD1	1.57327	0.44279
ERG1_HUMAN	Q14534	-1.36179	0.288228
ERG28_HUMAN	Q9UKR5	-0.780093	0.424718
ERG7_HUMAN	P48449	-1.20219	0.0445394
ERGI1_HUMAN	Q969X5	0.23118	0.417009
ERGI2_HUMAN	Q96RQ1	0.516105	0.0815153
ERGI3_HUMAN	Q9Y282	0.515872	0.416268
ERH_HUMAN	P84090	0.561787	0.288622
ERI1_HUMAN	Q8IV48	1.00675	0.652454
ERI3_HUMAN	O43414	0.319093	0.796075
ERLEC_HUMAN	Q96DZ1	-0.456636	0.279933
ERLN1_HUMAN	O75477	-0.530024	0.478439
ERLN1_HUMAN	O75477	-0.325013	0.521188
ERLN2_HUMAN	O94905	-0.0533416	0.936211
ERMP1_HUMAN	Q7Z2K6	1.42456	0.0491241
ERO1A_HUMAN	Q96HE7	0.136106	0.831746
ERP29_HUMAN	P30040	0.823111	0.251304
ERP44_HUMAN	Q9BS26	0.87878	0.0322336
ES1_HUMAN	P30042	0.310416	0.756065
ES8L2_HUMAN	Q9H6S3	0.0987999	0.858406
ESTD_HUMAN	P10768	0.407449	0.416268
ESYT1_HUMAN	Q9BSJ8	0.219408	0.719492
ESYT2_HUMAN	A0FGR8	-0.314411	0.391089
ETFA_HUMAN	P13804	-0.896001	0.372921
ETFB_HUMAN	P38117	-1.29021	0.415039
ETFD_HUMAN	Q16134	-3.87808	0.00926533
ETHE1_HUMAN	O95571	0.789478	0.358402
EVPL_HUMAN	Q92817	0.407449	0.416268
EWS_HUMAN	Q01844	0.084298	0.821533
EXD2_HUMAN	Q9NVH0	0.638547	0.719216
EXOC1_HUMAN	Q9NV70	1.20546	0.416268
EXOC2_HUMAN	Q96KP1	0.698969	0.536844
EXOC3_HUMAN	O60645	0.754386	0.478359
EXOC4_HUMAN	Q96A65	0.723318	0.245667
EXOC5_HUMAN	O00471	1.06494	0.64278
EXOG_HUMAN	Q9Y2C4	-1.76694	0.0781083
EXOS1_HUMAN	Q9Y3B2	0.930333	0.416268
EXOS2_HUMAN	Q13868	0.278111	0.425621
EXOS3_HUMAN	Q9NQT5	0.719606	0.67685
EXOS4_HUMAN	Q9NPD3	0.699083	0.52841
EXOS5_HUMAN	Q9NQT4	0.350498	0.716201
EXOS6_HUMAN	Q5RKV6	0.520836	0.254962
EXOS7_HUMAN	Q15024	0.626038	0.62371
EXOS8_HUMAN	Q96B26	0.604471	0.63471
EXOS9_HUMAN	Q06265	0.24385	0.866266
EXOSX_HUMAN	Q01780	0.62403	0.416268
EXT1_HUMAN	Q16394	0.483228	0.634757
EXT2_HUMAN	Q93063	-0.542761	0.424718
EXTL2_HUMAN	Q9UBQ6	-1.07188	0.251976
EZRI_HUMAN	P15311	1.29413	0.014679
F105A_HUMAN	Q9NUU6	-1.56164	0.416268
F107B_HUMAN	Q9H098	0.407449	0.601679
F10A1_HUMAN	P50502	0.387914	0.647374
F1142_HUMAN	Q9NRY5	-1.77343	0.589585
F120A_HUMAN	Q9NZB2	0.824251	0.253263
F136A_HUMAN	Q96C01	1.92122	0.03006
F162A_HUMAN	Q96A26	-1.82107	0.00704704
F173A_HUMAN	Q9BQD7	-1.27439	0.224857
F173B_HUMAN	Q6P4H8	-0.051892	0.962373
F177A_HUMAN	Q8N128	-1.02409	0.335921
F192A_HUMAN	Q9GZU8	0.147527	0.741776
F207A_HUMAN	Q9NSI2	-0.0608159	0.968673
F210A_HUMAN	Q96ND0	-0.22139	0.788447
F210B_HUMAN	Q96KR6	-0.388044	0.816543
F213A_HUMAN	Q9BRX8	0.715162	0.444124
F234A_HUMAN	Q9H0X4	-2.59116	0.190993
F241A_HUMAN	Q8N8J7	-0.0886693	0.97063
F8I2_HUMAN	P23610	2.43861	0.509684
F91A1_HUMAN	Q658Y4	0.331534	0.814578
FA156_HUMAN	Q8NDB6	1.02857	0.776839
FA49B_HUMAN	Q9NUQ9	0.318049	0.613358
FA50A_HUMAN	Q14320	0.410129	0.680308
FA83H_HUMAN	Q6ZRV2	0.580105	0.424718
FA96A_HUMAN	Q9H5X1	0.466456	0.441978
FA98A_HUMAN	Q8NCA5	-0.225242	0.667531
FA98B_HUMAN	Q52LJ0	0.709238	0.219044
FA98B_HUMAN	Q52LJ0	2.41984	0.24554
FAAA_HUMAN	P16930	0.407449	0.56533
FABD_HUMAN	Q8IVS2	-0.0872217	0.88489
FABP5_HUMAN	Q01469	0.407449	0.416268
FACD2_HUMAN	Q9BXW9	0.407449	0.416268
FACE1_HUMAN	O75844	0.0532701	0.92578
FACE2_HUMAN	Q9Y256	-0.214419	0.737903
FACR1_HUMAN	Q8WVX9	-1.95252	0.204183
FAD1_HUMAN	Q8NFF5	-4.17682	0.000935736
FADD_HUMAN	Q13158	0.407449	0.416268
FADS1_HUMAN	O60427	-3.31349	0.014679
FADS2_HUMAN	O95864	-3.80991	0.00132668
FADS3_HUMAN	Q9Y5Q0	-0.726884	0.333064
FAF1_HUMAN	Q9UNN5	-0.168508	0.701118
FAF2_HUMAN	Q96CS3	-0.118661	0.742926
FAH2A_HUMAN	Q96GK7	0.347233	0.726352
FAHD1_HUMAN	Q6P587	-1.88252	0.047153
FAK1_HUMAN	Q05397	3.04844	0.0227169
FAKD1_HUMAN	Q53R41	-0.414175	0.550325
FAKD2_HUMAN	Q9NYY8	0.470613	0.30898
FAKD3_HUMAN	Q14CZ7	-2.4078	0.144344
FAKD4_HUMAN	Q969Z0	-1.49077	0.00729287
FAKD5_HUMAN	Q7L8L6	0.141174	0.773265
FAM3A_HUMAN	P98173	-0.476421	0.551705
FAM3C_HUMAN	Q92520	-0.43763	0.305324
FANCI_HUMAN	Q9NVI1	0.737649	0.585435
FARP1_HUMAN	Q9Y4F1	0.671929	0.416268
FAS_HUMAN	P49327	-0.144601	0.903813
FAT1_HUMAN	Q14517	-0.271571	0.736976
FAT4_HUMAN	Q6V0I7	0.208446	0.851034
FBLL1_HUMAN	A6NHQ2	0.042103	0.958795
FBLN1_HUMAN	P23142	-0.823059	0.728438
FBLN3_HUMAN	Q12805	0.934771	0.658116
FBN1_HUMAN	P35555	-0.357525	0.704667
FBN2_HUMAN	P35556	-1.51847	0.416268
FBRL_HUMAN	P22087	0.298317	0.684145
FBX22_HUMAN	Q8NEZ5	0.407449	0.416268
FCF1_HUMAN	Q9Y324	0.436182	0.840056
FCL_HUMAN	Q13630	0.407449	0.416268
FDFT_HUMAN	P37268	-1.17902	0.291485
FDX2_HUMAN	Q6P4F2	-1.91494	0.322298
FEN1_HUMAN	P39748	0.476295	0.777904
FERM2_HUMAN	Q96AC1	0.546827	0.511328
FGF2_HUMAN	P09038	1.45484	0.253604
FGOP2_HUMAN	Q9NVK5	1.75053	0.356348
FHL1_HUMAN	Q13642	0.407449	0.416268
FHL2_HUMAN	Q14192	0.668867	0.268474
FHL3_HUMAN	Q13643	0.718506	0.217653
FHOD1_HUMAN	Q9Y613	-0.141738	0.911182
FIBP_HUMAN	O43427	0.460862	0.880812
FINC_HUMAN	P02751	-0.618378	0.487857
FIP1_HUMAN	Q6UN15	0.407449	0.416268
FIS1_HUMAN	Q9Y3D6	0.374542	0.56905
FITM2_HUMAN	Q8N6M3	1.94793	0.569875
FKB10_HUMAN	Q96AY3	0.516757	0.701118
FKB11_HUMAN	Q9NYL4	-0.632376	0.299805
FKB14_HUMAN	Q9NWM8	-2.09845	0.0591934
FKB15_HUMAN	Q5T1M5	1.89717	0.231455
FKB1A_HUMAN	P62942	0.407449	0.416268
FKBP2_HUMAN	P26885	0.00140336	0.998519
FKBP3_HUMAN	Q00688	-0.109703	0.966691
FKBP4_HUMAN	Q02790	0.407449	0.505643
FKBP7_HUMAN	Q9Y680	2.35323	0.234075
FKBP8_HUMAN	Q14318	-0.219554	0.679237
FKBP9_HUMAN	O95302	1.13948	0.257646
FKRP_HUMAN	Q9H9S5	0.326789	0.514912
FL2D_HUMAN	Q15007	0.318856	0.598017
FLII_HUMAN	Q13045	0.200043	0.878132
FLNA_HUMAN	P21333	-0.0871275	0.882279
FLNB_HUMAN	O75369	0.918327	0.227071
FLNC_HUMAN	Q14315	-1.05531	0.351781
FLOT1_HUMAN	O75955	-0.43127	0.424718
FLOT2_HUMAN	Q14254	-0.519793	0.121125
FMC1_HUMAN	Q96HJ9	-1.52303	0.0280919
FMNL1_HUMAN	O95466	1.39573	0.418422
FMNL2_HUMAN	Q96PY5	1.11347	0.277924
FMR1_HUMAN	Q06787	-0.229956	0.839149
FMT_HUMAN	Q96DP5	-3.46899	0.125843
FNBP4_HUMAN	Q8N3X1	0.637769	0.464617
FND3A_HUMAN	Q9Y2H6	-1.24284	0.41286
FND3B_HUMAN	Q53EP0	-1.40489	0.416268
FOCAD_HUMAN	Q5VW36	0.18389	0.726994
FOLC_HUMAN	Q05932	0.332746	0.665833
FOLR1_HUMAN	P15328	2.91026	0.0861378
FOXK1_HUMAN	P85037	0.596316	0.644384
FPPS_HUMAN	P14324	0.213782	0.776495
FPRP_HUMAN	Q9P2B2	-0.437759	0.416268
FR1L4_HUMAN	A9Z1Z3	-0.0538562	0.97712
FRAS1_HUMAN	Q86XX4	0.2982	0.856951
FRDA_HUMAN	Q16595	-0.561369	0.751941
FRG1_HUMAN	Q14331	0.655935	0.746961
FRIH_HUMAN	P02794	-0.927463	0.20988
FRIL_HUMAN	P02792	-1.28079	0.416268
FRYL_HUMAN	O94915	0.397701	0.424718
FSCN1_HUMAN	Q16658	-0.429193	0.754126
FTO_HUMAN	Q9C0B1	0.580105	0.424718
FUBP1_HUMAN	Q96AE4	0.773979	0.706308
FUBP2_HUMAN	Q92945	-0.656871	0.57066
FUBP2_HUMAN	Q92945	1.11571	0.736976
FUBP3_HUMAN	Q96I24	-0.163468	0.942928
FUCT1_HUMAN	Q96A29	-1.23691	0.672236
FUMH_HUMAN	P07954	-0.952796	0.340179
FUND1_HUMAN	Q8IVP5	-0.907791	0.567306
FUND2_HUMAN	Q9BWH2	-0.769097	0.340633
FUS_HUMAN	P35637	-1.45015	0.416268
FUS_HUMAN	P35637	-0.512786	0.826116
FUT8_HUMAN	Q9BYC5	-1.51939	0.1719
FWCH2_HUMAN	Q96CP2	0.576976	0.213356
FXL18_HUMAN	Q96ME1	0.184267	0.835776
FXL20_HUMAN	Q96IG2	1.24281	0.592815
FXR1_HUMAN	P51114	-1.41581	0.173339
FXR1_HUMAN	P51114	-0.0203442	0.987868
FXR2_HUMAN	P51116	-0.481195	0.352402
FXRD1_HUMAN	Q96CU9	0.316769	0.574348
FYCO1_HUMAN	Q9BQS8	0.00657533	0.994657
G3BP1_HUMAN	Q13283	0.0223614	0.970961
G3BP2_HUMAN	Q9UN86	-0.218649	0.569812
G3P_HUMAN	P04406	0.697073	0.416268
G45IP_HUMAN	Q8TAE8	-3.58508	0.00734995
G6PC3_HUMAN	Q9BUM1	0.0490222	0.978004
G6PD_HUMAN	P11413	0.683977	0.63471
G6PI_HUMAN	P06744	0.418612	0.416268
GABPA_HUMAN	Q06546	0.381071	0.854826
GALE_HUMAN	Q14376	0.407449	0.416268
GALK1_HUMAN	P51570	0.407449	0.747197
GALT1_HUMAN	Q10472	-0.842747	0.308345
GALT2_HUMAN	Q10471	-0.270284	0.697238
GALT3_HUMAN	Q14435	0.533961	0.372485
GALT4_HUMAN	Q8N4A0	1.32521	0.535479
GALT7_HUMAN	Q86SF2	-0.197588	0.703324
GAMT_HUMAN	Q14353	0.543442	0.424718
GANAB_HUMAN	Q14697	0.747347	0.530881
GAPD1_HUMAN	Q14C86	1.13907	0.208333
GAPR1_HUMAN	Q9H4G4	0.00760168	0.992767
GAR1_HUMAN	Q9NY12	0.676525	0.588432
GARS_HUMAN	P41250	-0.10866	0.830918
GATA_HUMAN	Q9H0R6	0.992783	0.340757
GATB_HUMAN	O75879	1.40265	0.416268
GATC_HUMAN	O43716	0.13477	0.825552
GATM_HUMAN	P50440	2.2056	0.537043
GBB1_HUMAN	P62873	0.378402	0.652454
GBB2_HUMAN	P62879	-0.165293	0.696591
GBB4_HUMAN	Q9HAV0	-0.281938	0.833475
GBF1_HUMAN	Q92538	0.428864	0.447296
GBG12_HUMAN	Q9UBI6	-0.0089184	0.991203
GBG2_HUMAN	P59768	1.40081	0.251976
GBG5_HUMAN	P63218	-1.24363	0.425411
GBP1_HUMAN	P32455	0.407449	0.416268
GBRL2_HUMAN	P60520	-2.48654	0.0620443
GCC2_HUMAN	Q8IWJ2	-0.395364	0.78132
GCDH_HUMAN	Q92947	-0.579155	0.3629
GCN1_HUMAN	Q92616	-0.0663014	0.943896
GCP2_HUMAN	Q9BSJ2	-0.118068	0.954248
GCP3_HUMAN	Q96CW5	0.526382	0.78465
GCP4_HUMAN	Q9UGJ1	-0.566982	0.659031
GCP60_HUMAN	Q9H3P7	0.281728	0.585478
GCR_HUMAN	P04150	-0.292675	0.768154
GCSH_HUMAN	P23434	0.29299	0.762199
GDAP1_HUMAN	Q8TB36	0.167393	0.853379
GDC_HUMAN	P16260	2.87149	0.0595282
GDE_HUMAN	P35573	0.407449	0.416268
GDE1_HUMAN	Q9NZC3	-1.60464	0.556886
GDIA_HUMAN	P31150	0.407449	0.416268
GDIB_HUMAN	P50395	0.658648	0.176676
GDIR1_HUMAN	P52565	0.625548	0.416268
GDN_HUMAN	P07093	0.222889	0.6769
GDPD1_HUMAN	Q8N9F7	1.25003	0.416268
GDS1_HUMAN	P52306	1.07756	0.306952
GEMI2_HUMAN	O14893	0.664881	0.416268
GEMI4_HUMAN	P57678	0.319177	0.6769
GEMI5_HUMAN	Q8TEQ6	0.679547	0.323801
GEMI6_HUMAN	Q8WXD5	0.681351	0.464617
GEMI7_HUMAN	Q9H840	-0.140524	0.89191
GEPH_HUMAN	Q9NQX3	0.543442	0.424718
GET4_HUMAN	Q7L5D6	-0.794559	0.416268
GFPT1_HUMAN	Q06210	0.407449	0.629262
GGCT_HUMAN	O75223	0.407449	0.416268
GGH_HUMAN	Q92820	-0.104903	0.946735
GGT1_HUMAN	P19440	3.4001	0.00729287
GGT7_HUMAN	Q9UJ14	-1.47717	0.522701
GGYF2_HUMAN	Q6Y7W6	0.244637	0.738555
GHC1_HUMAN	Q9H936	-0.668214	0.416268
GHDC_HUMAN	Q8N2G8	0.725478	0.428509
GHITM_HUMAN	Q9H3K2	1.77674	0.0206244
GID8_HUMAN	Q9NWU2	0.407449	0.416268
GILT_HUMAN	P13284	-1.17317	0.805629
GIPC1_HUMAN	O14908	0.00832177	0.990315
GIT1_HUMAN	Q9Y2X7	0.824106	0.598319
GL1AD_HUMAN	Q6EEV4	-1.37226	0.77955
GL8D1_HUMAN	Q68CQ7	0.110197	0.730161
GL8D2_HUMAN	Q9H1C3	-2.0922	0.246262
GLCE_HUMAN	O94923	-0.476594	0.43697
GLCM_HUMAN	P04062	0.561413	0.516975
GLCNE_HUMAN	Q9Y223	0.0987999	0.882279
GLE1_HUMAN	Q53GS7	2.29907	0.348922
GLGB_HUMAN	Q04446	0.407449	0.416268
GLIP1_HUMAN	P48060	-0.242286	0.777498
GLMN_HUMAN	Q92990	0.580105	0.424718
GLMP_HUMAN	Q8WWB7	-0.923682	0.155787
GLNA_HUMAN	P15104	0.543442	0.424718
GLO2_HUMAN	Q16775	-1.30559	0.416268
GLOD4_HUMAN	Q9HC38	0.407449	0.416268
GLP3L_HUMAN	Q9H4A5	0.543442	0.892527
GLPK_HUMAN	P32189	0.301914	0.720335
GLRX1_HUMAN	P35754	0.407449	0.416268
GLRX3_HUMAN	O76003	0.407449	0.416268
GLRX5_HUMAN	Q86SX6	-0.552544	0.425411
GLSK_HUMAN	O94925	-0.0355933	0.971759
GLT10_HUMAN	Q86SR1	0.23704	0.82919
GLU2B_HUMAN	P14314	0.0832206	0.950801
GLUCM_HUMAN	Q7Z3D6	0.879118	0.575025
GLYC_HUMAN	P34896	0.407449	0.416268
GLYG_HUMAN	P46976	0.0987999	0.882279
GLYM_HUMAN	P34897	0.266267	0.416268
GLYR1_HUMAN	Q49A26	0.224084	0.86337
GMFB_HUMAN	P60983	0.174723	0.782792
GMPPA_HUMAN	Q96IJ6	0.407449	0.416268
GMPPB_HUMAN	Q9Y5P6	0.407449	0.416268
GNA1_HUMAN	Q96EK6	0.502507	0.271688
GNA11_HUMAN	P29992	-0.565675	0.416268
GNA13_HUMAN	Q14344	-0.108545	0.868612
GNAI1_HUMAN	P63096	-1.23057	0.0521765
GNAI2_HUMAN	P04899	-0.0695824	0.920756
GNAI3_HUMAN	P08754	-0.277108	0.703183
GNAQ_HUMAN	P50148	-1.74922	0.553444
GNAS2_HUMAN	P63092	0.388357	0.416268
GNAZ_HUMAN	P19086	-0.381596	0.455806
GNL1_HUMAN	P36915	0.407449	0.416268
GNL3_HUMAN	Q9BVP2	0.306953	0.530881
GNL3L_HUMAN	Q9NVN8	0.518964	0.728863
GNPAT_HUMAN	O15228	-0.0497281	0.971145
GNPI1_HUMAN	P46926	0.407449	0.424718
GNPI2_HUMAN	Q8TDQ7	0.407449	0.416268
GNPTA_HUMAN	Q3T906	-0.232473	0.88338
GNS_HUMAN	P15586	-0.377554	0.428509
GOGA1_HUMAN	Q92805	-1.80701	0.416268
GOGA2_HUMAN	Q08379	0.0875341	0.946735
GOGA3_HUMAN	Q08378	-0.712009	0.64754
GOGA4_HUMAN	Q13439	-0.744021	0.478439
GOGA5_HUMAN	Q8TBA6	-0.0144114	0.988845
GOGA7_HUMAN	Q7Z5G4	0.339903	0.642015
GOGB1_HUMAN	Q14789	0.0188499	0.991368
GOLI4_HUMAN	O00461	-0.747306	0.416268
GOLM1_HUMAN	Q8NBJ4	0.370444	0.581382
GOLP3_HUMAN	Q9H4A6	-0.342243	0.853379
GOPC_HUMAN	Q9HD26	0.0987999	0.882279
GORAB_HUMAN	Q5T7V8	0.264314	0.930575
GORS1_HUMAN	Q9BQQ3	-0.206637	0.868612
GORS2_HUMAN	Q9H8Y8	0.315043	0.822592
GOSR1_HUMAN	O95249	-0.176773	0.738176
GOSR2_HUMAN	O14653	-1.17787	0.416268
GOT1B_HUMAN	Q9Y3E0	0.326698	0.720332
GP180_HUMAN	Q86V85	-1.88111	0.395566
GPAA1_HUMAN	O43292	-0.196584	0.763842
GPAT1_HUMAN	Q9HCL2	-1.44128	0.406303
GPAT3_HUMAN	Q53EU6	-1.31646	0.511915
GPAT4_HUMAN	Q86UL3	-0.14072	0.957179
GPC1_HUMAN	P35052	0.768505	0.418898
GPD1L_HUMAN	Q8N335	-1.20752	0.416268
GPDM_HUMAN	P43304	-0.0398795	0.959524
GPHRB_HUMAN	P0CG08	0.0922482	0.89191
GPI8_HUMAN	Q92643	-0.678612	0.0930577
GPKOW_HUMAN	Q92917	0.407449	0.416268
GPN1_HUMAN	Q9HCN4	-0.359768	0.929972
GPN3_HUMAN	Q9UHW5	0.543442	0.831746
GPNMB_HUMAN	Q14956	3.40257	0.416268
GPX1_HUMAN	P07203	-0.12674	0.946376
GPX4_HUMAN	P36969	1.54374	0.416268
GPX8_HUMAN	Q8TED1	0.594623	0.399487
GRAP1_HUMAN	Q4V328	0.543442	0.424718
GRB2_HUMAN	P62993	-0.803372	0.416268
GRHPR_HUMAN	Q9UBQ7	-2.24299	0.0348729
GRM1B_HUMAN	Q3KR37	2.54496	0.0647478
GRN_HUMAN	P28799	0.709427	0.677836
GRP75_HUMAN	P38646	0.244772	0.554258
GRPE1_HUMAN	Q9HAV7	0.495871	0.416268
GRPE2_HUMAN	Q8TAA5	2.0852	0.128634
GRSF1_HUMAN	Q12849	-0.775891	0.247174
GRWD1_HUMAN	Q9BQ67	2.6453	0.335829
GSDME_HUMAN	O60443	0.22427	0.900743
GSH0_HUMAN	P48507	0.72621	0.238147
GSH1_HUMAN	P48506	0.114085	0.88338
GSHB_HUMAN	P48637	0.407449	0.416268
GSHR_HUMAN	P00390	0.597406	0.416268
GSK3B_HUMAN	P49841	-0.195476	0.846843
GSLG1_HUMAN	Q92896	-1.35506	0.088463
GSTK1_HUMAN	Q9Y2Q3	-0.489433	0.734382
GSTM1_HUMAN	P09488	0.407449	0.416268
GSTM3_HUMAN	P21266	0.775651	0.239498
GSTM4_HUMAN	Q03013	0.407449	0.416268
GSTO1_HUMAN	P78417	0.407449	0.416268
GSTP1_HUMAN	P09211	0.417481	0.416268
GSTT2_HUMAN	P0CG30	0.24443	0.584945
GT251_HUMAN	Q8NBJ5	-0.251823	0.416268
GTF2I_HUMAN	P78347	-0.863669	0.416268
GTPB1_HUMAN	O00178	1.54638	0.178955
GTPB3_HUMAN	Q969Y2	-0.735533	0.596321
GTPB6_HUMAN	O43824	-4.43377	0.000281273
GTPB8_HUMAN	Q8N3Z3	0.00318305	0.995162
GTPBA_HUMAN	A4D1E9	-1.31361	0.0750925
GTR1_HUMAN	P11166	0.374466	0.6769
GTR3_HUMAN	P11169	2.29666	0.231102
GUAA_HUMAN	P49915	0.407449	0.416268
GUAD_HUMAN	Q9Y2T3	0.407449	0.416268
GUF1_HUMAN	Q8N442	-2.96214	0.310966
GULP1_HUMAN	Q9UBP9	0.545009	0.806327
GYS1_HUMAN	P13807	0.407449	0.416268
H10_HUMAN	P07305	0.288083	0.740895
H11_HUMAN	Q02539	-1.98231	0.101858
H12_HUMAN	P16403	0.375053	0.822197
H13_HUMAN	P16402	-0.228683	0.746185
H14_HUMAN	P10412	-1.34252	0.416268
H14_HUMAN	P10412	0.587705	0.858955
H14_HUMAN	P10412	-0.155074	0.861022
H15_HUMAN	P16401	-0.521244	0.416268
H1X_HUMAN	Q92522	0.800423	0.207132
H2A1C_HUMAN	Q93077	0.543442	0.424718
H2A1J_HUMAN	Q99878	0.879294	0.900923
H2A2A_HUMAN	Q6FI13	0.378969	0.691897
H2A2A_HUMAN	Q6FI13	-0.441648	0.611797
H2AV_HUMAN	Q71UI9	0.303991	0.625396
H2AY_HUMAN	O75367	0.407449	0.416268
H2B1L_HUMAN	Q99880	-0.281593	0.959783
H2B2E_HUMAN	Q16778	0.166146	0.950801
H2B2E_HUMAN	Q16778	-0.299798	0.68205
H31_HUMAN	P68431	0.13915	0.942816
H32_HUMAN	Q71DI3	0.58555	0.868612
H33_HUMAN	P84243	0.84286	0.773492
H4_HUMAN	P62805	-0.510654	0.521634
H90B2_HUMAN	Q58FF8	0.11814	0.931438
H90B4_HUMAN	Q58FF6	1.1128	0.527421
HACD2_HUMAN	Q6Y1H2	0.0497522	0.955913
HACD3_HUMAN	Q9P035	-0.677309	0.259393
HACL1_HUMAN	Q9UJ83	0.185344	0.726352
HAP28_HUMAN	Q13442	-0.518917	0.701255
HAT1_HUMAN	O14929	0.132027	0.882279
HAUS1_HUMAN	Q96CS2	0.543442	0.424718
HAX1_HUMAN	O00165	0.878944	0.234689
HBA_HUMAN	P69905	0.18258	0.936211
HBS1L_HUMAN	Q9Y450	0.543442	0.424718
HCD2_HUMAN	Q99714	-0.46386	0.298495
HCDH_HUMAN	Q16836	-0.697884	0.416268
HCFC1_HUMAN	P51610	0.65093	0.416268
HD_HUMAN	P42858	-0.0116536	0.992813
HDAC1_HUMAN	Q13547	0.643871	0.75589
HDAC2_HUMAN	Q92769	-0.120079	0.943331
HDAC6_HUMAN	Q9UBN7	0.543442	0.424718
HDDC2_HUMAN	Q7Z4H3	0.39213	0.459737
HDGF_HUMAN	P51858	0.407449	0.662305
HDGR2_HUMAN	Q7Z4V5	0.407449	0.416268
HDGR2_HUMAN	Q7Z4V5	-0.52885	0.667968
HDHD2_HUMAN	Q9H0R4	0.543442	0.424718
HDHD3_HUMAN	Q9BSH5	0.466446	0.613721
HDHD5_HUMAN	Q9BXW7	-0.58433	0.305324
HEAT1_HUMAN	Q9H583	1.06339	0.416268
HEBP1_HUMAN	Q9NRV9	2.39764	0.114713
HEBP2_HUMAN	Q9Y5Z4	0.407449	0.416268
HECD1_HUMAN	Q9ULT8	0.271658	0.612993
HEG1_HUMAN	Q9ULI3	-0.484659	0.416268
HEM1_HUMAN	P13196	0.904928	0.0855905
HEM2_HUMAN	P13716	1.08894	0.434396
HEM6_HUMAN	P36551	-0.278948	0.719291
HEMH_HUMAN	P22830	-0.804533	0.311281
HERC1_HUMAN	Q15751	0.407449	0.416268
HERC2_HUMAN	O95714	-0.201605	0.915767
HERC4_HUMAN	Q5GLZ8	-0.127192	0.930022
HERC5_HUMAN	Q9UII4	2.61651	0.0502474
HEXA_HUMAN	P06865	0.183001	0.882279
HEXB_HUMAN	P07686	0.302677	0.756587
HGH1_HUMAN	Q9BTY7	0.407449	0.416268
HGS_HUMAN	O14964	-0.0847256	0.914253
HIBCH_HUMAN	Q6NVY1	0.510131	0.423404
HIG1A_HUMAN	Q9Y241	0.567597	0.430559
HIG2A_HUMAN	Q9BW72	-0.818011	0.881425
HIKES_HUMAN	Q53FT3	-0.0086392	0.995284
HINT1_HUMAN	P49773	0.496162	0.359721
HINT2_HUMAN	Q9BX68	0.470763	0.434948
HINT3_HUMAN	Q9NQE9	0.724013	0.416268
HIP1_HUMAN	O00291	-1.67719	0.324322
HIP1R_HUMAN	O75146	0.459916	0.821335
HLTF_HUMAN	Q14527	2.12501	0.366678
HM13_HUMAN	Q8TCT9	0.00502214	0.9898
HMCS1_HUMAN	Q01581	0.407449	0.416268
HMDH_HUMAN	P04035	-0.869103	0.730161
HMGA1_HUMAN	P17096	0.308784	0.882279
HMGB1_HUMAN	P09429	-0.447894	0.760133
HMGB1_HUMAN	P09429	0.442087	0.809995
HMGB2_HUMAN	P26583	1.12422	0.496607
HMGB3_HUMAN	O15347	-0.340882	0.826915
HMGCL_HUMAN	P35914	0.230212	0.821533
HMGN2_HUMAN	P05204	0.530892	0.855718
HMGN5_HUMAN	P82970	-1.04868	0.611797
HMMR_HUMAN	O75330	1.13377	0.604266
HMOX1_HUMAN	P09601	-0.895016	0.322202
HMOX2_HUMAN	P30519	-1.00147	0.330568
HNMT_HUMAN	P50135	0.407449	0.416268
HNRC4_HUMAN	P0DMR1	0.407449	0.416268
HNRDL_HUMAN	O14979	0.136208	0.946735
HNRH1_HUMAN	P31943	-0.453292	0.643167
HNRH2_HUMAN	P55795	0.39437	0.689756
HNRH3_HUMAN	P31942	0.224302	0.886547
HNRL1_HUMAN	Q9BUJ2	0.627234	0.554415
HNRL2_HUMAN	Q1KMD3	-0.169192	0.882279
HNRLL_HUMAN	Q8WVV9	1.25386	0.430781
HNRPC_HUMAN	P07910	-0.241287	0.794852
HNRPD_HUMAN	Q14103	0.219711	0.779314
HNRPF_HUMAN	P52597	0.0954986	0.829058
HNRPK_HUMAN	P61978	0.354419	0.30774
HNRPL_HUMAN	P14866	0.236915	0.806472
HNRPM_HUMAN	P52272	-0.0284078	0.950801
HNRPQ_HUMAN	O60506	0.0187931	0.981383
HNRPR_HUMAN	O43390	0.551708	0.666706
HNRPR_HUMAN	O43390	-0.000952759	0.998544
HNRPU_HUMAN	Q00839	0.0318449	0.967725
HOOK3_HUMAN	Q86VS8	0.0987999	0.968907
HP1B3_HUMAN	Q5SSJ5	0.455296	0.522427
HPBP1_HUMAN	Q9NZL4	1.17279	0.416268
HPCL1_HUMAN	P37235	-0.133763	0.952426
HPDL_HUMAN	Q96IR7	-1.16157	0.358957
HPF1_HUMAN	Q9NWY4	1.53877	0.416268
HPRT_HUMAN	P00492	0.631528	0.238916
HS105_HUMAN	Q92598	0.261834	0.743092
HS2ST_HUMAN	Q7LGA3	-1.62966	0.0260272
HS71B_HUMAN	P0DMV9	-0.138754	0.65889
HS74L_HUMAN	O95757	0.407449	0.417763
HS90A_HUMAN	P07900	0.281099	0.722103
HS90A_HUMAN	P07900	0.184909	0.860526
HS90B_HUMAN	P08238	0.166011	0.709096
HS90B_HUMAN	P08238	-0.669612	0.727013
HSBP1_HUMAN	O75506	-0.16088	0.826116
HSC20_HUMAN	Q8IWL3	0.140857	0.903533
HSDL1_HUMAN	Q3SXM5	-0.712228	0.612993
HSDL2_HUMAN	Q6YN16	-0.269551	0.831927
HSF1_HUMAN	Q00613	1.61687	0.113389
HSP13_HUMAN	P48723	0.190677	0.745714
HSP74_HUMAN	P34932	0.407449	0.531285
HSP76_HUMAN	P17066	0.154571	0.755921
HSP7C_HUMAN	P11142	-0.200663	0.562832
HSP7E_HUMAN	Q0VDF9	0.380362	0.72454
HSPB1_HUMAN	P04792	0.327987	0.424718
HTAI2_HUMAN	Q9BUP3	-0.24933	0.728863
HTR5A_HUMAN	Q86XA9	1.91926	0.12717
HTRA2_HUMAN	O43464	1.61779	0.44279
HTSF1_HUMAN	O43719	0.407449	0.416268
HUWE1_HUMAN	Q7Z6Z7	0.0235634	0.97826
HXK1_HUMAN	P19367	0.488182	0.742926
HXK2_HUMAN	P52789	1.29409	0.173374
HYEP_HUMAN	P07099	-1.31289	0.179161
HYI_HUMAN	Q5T013	-0.160247	0.943904
HYOU1_HUMAN	Q9Y4L1	0.438405	0.562913
HYPK_HUMAN	Q9NX55	0.407449	0.416268
I2BP2_HUMAN	Q7Z5L9	0.2488	0.654179
I2BPL_HUMAN	Q9H1B7	0.368743	0.878132
IAH1_HUMAN	Q2TAA2	-0.422562	0.726394
IASPP_HUMAN	Q8WUF5	3.27778	0.0421912
IBP7_HUMAN	Q16270	0.285334	0.416282
ICAL_HUMAN	P20810	1.24186	0.260449
ICAM1_HUMAN	P05362	-1.07273	0.0227152
ICLN_HUMAN	P54105	0.407449	0.881425
ICT1_HUMAN	Q14197	-2.16147	0.117181
IDE_HUMAN	P14735	-0.84466	0.481074
IDH3A_HUMAN	P50213	-0.549905	0.416268
IDH3B_HUMAN	O43837	-0.146976	0.778404
IDH3G_HUMAN	P51553	-1.04229	0.0977653
IDHC_HUMAN	O75874	2.21567	0.0120535
IDHP_HUMAN	P48735	-2.03676	0.14187
IDI1_HUMAN	Q13907	-0.32222	0.623745
IF16_HUMAN	Q16666	0.144969	0.901269
IF1AX_HUMAN	P47813	-0.709295	0.56952
IF2A_HUMAN	P05198	0.787303	0.158031
IF2B_HUMAN	P20042	0.8932	0.405253
IF2B1_HUMAN	Q9NZI8	0.583039	0.416268
IF2B2_HUMAN	Q9Y6M1	0.0759395	0.96806
IF2B3_HUMAN	O00425	-0.484483	0.417763
IF2G_HUMAN	P41091	0.474211	0.416268
IF2M_HUMAN	P46199	-0.240539	0.721905
IF2P_HUMAN	O60841	0.515513	0.700359
IF3M_HUMAN	Q9H2K0	-0.382009	0.466535
IF4A1_HUMAN	P60842	-0.889531	0.340179
IF4A2_HUMAN	Q14240	0.198708	0.726221
IF4A3_HUMAN	P38919	-0.611701	0.416268
IF4B_HUMAN	P23588	-0.0509063	0.911913
IF4E_HUMAN	P06730	-0.84603	0.424718
IF4E2_HUMAN	O60573	0.0602566	0.982375
IF4G1_HUMAN	Q04637	0.0513202	0.933617
IF4G2_HUMAN	P78344	0.348127	0.62371
IF4G3_HUMAN	O43432	-0.293622	0.882279
IF4H_HUMAN	Q15056	-0.12354	0.952951
IF5_HUMAN	P55010	0.407449	0.718808
IF5A1_HUMAN	P63241	-0.313373	0.416268
IF6_HUMAN	P56537	0.0355187	0.96524
IFG15_HUMAN	Q9H496	0.698735	0.238166
IFM3_HUMAN	Q01628	-1.03012	0.0861378
IFT25_HUMAN	Q9Y547	0.407449	0.416268
IGBP1_HUMAN	P78318	0.543442	0.424718
IGF1R_HUMAN	P08069	0.371476	0.431482
IGS22_HUMAN	Q8N9C0	-1.07809	0.593618
IGSF3_HUMAN	O75054	0.986095	0.254299
IGSF8_HUMAN	Q969P0	0.654195	0.760133
IKIP_HUMAN	Q70UQ0	-1.40501	0.164324
IKKA_HUMAN	O15111	1.7669	0.416268
IKKB_HUMAN	O14920	2.89032	0.0557415
IL18_HUMAN	Q14116	0.407449	0.416268
IL1AP_HUMAN	Q9NPH3	-0.431751	0.860963
IL6RB_HUMAN	P40189	0.224985	0.760133
ILEU_HUMAN	P30740	0.407449	0.416268
ILF2_HUMAN	Q12905	-0.331761	0.416268
ILF3_HUMAN	Q12906	-0.379861	0.710354
ILK_HUMAN	Q13418	0.465336	0.648182
ILKAP_HUMAN	Q9H0C8	-0.506756	0.575025
ILVBL_HUMAN	A1L0T0	-0.283874	0.750103
IMA1_HUMAN	P52292	-0.915164	0.0521765
IMA3_HUMAN	O00629	0.175166	0.707725
IMA4_HUMAN	O00505	-0.0668934	0.936211
IMA5_HUMAN	P52294	0.407449	0.416268
IMA7_HUMAN	O60684	0.222897	0.416268
IMA7_HUMAN	O60684	0.239907	0.63471
IMB1_HUMAN	Q14974	0.102956	0.777498
IMDH1_HUMAN	P20839	0.407449	0.629123
IMDH2_HUMAN	P12268	0.407449	0.416268
IMP3_HUMAN	Q9NV31	0.20432	0.771995
IMP4_HUMAN	Q96G21	-0.554954	0.781173
IMPA1_HUMAN	P29218	0.407449	0.416268
IMPA2_HUMAN	O14732	0.0987999	0.882279
IMPA3_HUMAN	Q9NX62	0.0991033	0.870967
IMUP_HUMAN	Q9GZP8	3.22269	0.0739782
IN35_HUMAN	P80217	0.407449	0.775777
INF2_HUMAN	Q27J81	0.76048	0.416268
INGR1_HUMAN	P15260	-1.58688	0.416268
INPP_HUMAN	P49441	0.407449	0.416268
INT1_HUMAN	Q8N201	-0.633352	0.416268
INT13_HUMAN	Q9NVM9	-0.257016	0.832417
INT14_HUMAN	Q96SY0	0.382676	0.728863
INT2_HUMAN	Q9H0H0	0.543442	0.424718
INT3_HUMAN	Q68E01	-0.453893	0.416268
INT4_HUMAN	Q96HW7	0.867829	0.631053
INT6_HUMAN	Q9UL03	0.111207	0.884024
INT8_HUMAN	Q75QN2	-1.92495	0.289304
IPO11_HUMAN	Q9UI26	0.374559	0.72809
IPO13_HUMAN	O94829	0.394896	0.722524
IPO4_HUMAN	Q8TEX9	-0.0203589	0.964808
IPO5_HUMAN	O00410	0.0870951	0.915624
[truncated: 3,077 more rows]

## Sheet: All identified proteins
Figure 6-2. All summarized Peptide Spectral Matches (PSMs) for WT and PTCD1 KO, in each of three replicates, in isolated mitochondria and whole cell lysate
Protein	WT mito r1	WT mito r2	WT mito r3	PTCD1 KO mito r1	PTCD1 KO mito r2	PTCD1 KO mito r3	WT whole cell lysate r1	WT whole cell lysate r2	WT whole cell lysate r3	PTCD1 KO whole cell lysate r1	PTCD1 KO whole cell lysate r2	PTCD1 KO whole cell lysate r3
CON__ENSEMBL:ENSBTAP00000024146;sp|P01023|A2MG_HUMAN	70	8	14	53	156	173	105	47	90	108	235	199
CON__ENSEMBL:ENSBTAP00000032840	4	17	35	3	17	8	8	44	74	4	18	9
CON__ENSEMBL:ENSBTAP00000034412	0	1	0	4	3	3	2	2	1	5	7	11
CON__ENSEMBL:ENSBTAP00000037665	0	0	0	4	12	12	0	0	2	2	19	12
CON__P00735;sp|P00734|THRB_HUMAN	0	0	0	0	0	0	0	0	0	1	6	6
CON__P00761	138	0	288	116	0	293	125	0	261	126	0	275
CON__P01030;CON__ENSEMBL:ENSBTAP00000007350	1	0	0	2	0	0	1	0	0	0	0	0
CON__P01966	10	9	0	8	7	0	11	13	0	9	10	0
CON__P02662	3	10	4	11	9	7	4	10	13	3	3	3
CON__P02666	0	0	0	1	0	1	0	1	3	0	0	0
CON__P02754	0	1	1	1	1	1	0	3	1	0	1	0
CON__P02769	47	0	46	64	0	55	114	0	119	108	0	81
CON__P02777	2	6	4	2	6	2	4	6	5	5	5	2
CON__P04258	1	0	0	0	0	0	0	0	0	0	0	0
CON__P06868;sp|P00747|PLMN_HUMAN	0	0	0	10	0	7	0	0	0	11	0	8
CON__P07744	2	1	0	5	1	0	2	1	0	2	4	0
CON__P08729	52	0	0	101	0	0	106	0	0	184	0	0
CON__P12763;sp|P02765|FETUA_HUMAN	3	7	7	7	5	8	8	20	24	11	7	8
CON__P13717	0	0	0	0	0	0	21	30	17	24	28	17
CON__P15497;sp|P02647|APOA1_HUMAN	2	4	4	11	7	5	5	14	9	8	4	2
CON__P17690	4	0	0	1	0	0	0	0	0	1	0	0
CON__P17697	0	0	0	0	0	0	0	0	0	0	1	4
CON__P34955	8	2	4	7	10	13	17	24	33	14	25	16
CON__P81644	0	1	2	0	1	1	0	2	2	0	1	1
CON__Q03247;sp|P02649|APOE_HUMAN	2	11	16	4	10	9	4	10	22	1	8	7
CON__Q0IIK2;CON__Q29443;CON__Q2HJF0	34	0	0	27	0	0	26	0	0	19	0	0
CON__Q0V8M9;sp|Q06033|ITIH3_HUMAN	4	7	7	3	16	8	3	13	14	3	16	8
CON__Q1RMK2	0	0	0	1	0	0	0	0	0	0	0	0
CON__Q28107;sp|P12259|FA5_HUMAN	9	17	15	14	43	32	6	8	8	4	27	20
CON__Q3MHN5;CON__ENSEMBL:ENSBTAP00000018229	0	0	0	0	0	0	0	0	1	1	0	0
CON__Q3SX09;sp|P68871|HBB_HUMAN;sp|P02042|HBD_HUMAN	15	0	13	19	0	14	16	0	18	23	0	22
CON__Q3SX28	0	1	2	2	2	2	5	7	10	9	10	12
CON__Q3SZ57	0	0	0	0	0	0	0	0	0	0	0	0
CON__Q3SZR3	0	0	0	0	0	0	1	4	6	0	0	0
CON__Q3SZV7	0	1	4	2	7	4	0	4	9	2	7	5
CON__Q3Y5Z3	0	0	1	4	2	3	0	4	6	6	3	4
CON__Q3ZBD7	0	0	0	0	0	0	6	5	4	8	6	6
CON__Q3ZBS7;sp|P04004|VTNC_HUMAN	11	0	0	19	0	0	13	0	0	19	0	0
CON__Q6IFX2	0	0	0	0	0	0	0	1	0	1	1	0
CON__Q6IFZ6	1	3	1	1	4	0	2	6	4	2	6	10
CON__Q6IME9;sp|Q14CN4|K2C72_HUMAN;CON__Q14CN4-1	0	0	0	0	0	0	0	0	1	0	2	1
CON__Q9Z2K1;CON__Q3ZAW8	0	0	0	0	0	0	0	0	0	0	0	0
CON__Streptavidin	0	33	4	0	12	9	3	40	7	0	18	7
REV__CON__ENSEMBL:ENSBTAP00000024146	0	0	0	0	0	0	0	0	0	0	0	0
REV__sp|A0AVI2|FR1L5_HUMAN	0	0	0	0	0	0	0	0	0	1	0	0
REV__sp|A6NHC0|CAN8_HUMAN	0	0	0	1	0	0	1	0	0	0	0	0
REV__sp|A8K2U0|A2ML1_HUMAN	1	0	0	0	0	0	0	0	0	0	0	0
REV__sp|O00482|NR5A2_HUMAN	0	0	0	0	0	0	0	0	0	0	0	0
REV__sp|O15013|ARHGA_HUMAN	1	0	0	0	0	0	0	0	0	0	0	0
REV__sp|O15050|TRNK1_HUMAN	0	0	1	0	1	1	1	1	2	2	2	1
REV__sp|O15440|MRP5_HUMAN	5	0	0	6	0	0	3	0	0	3	0	0
REV__sp|O43909|EXTL3_HUMAN	0	0	0	1	0	0	0	0	0	0	0	0
REV__sp|O94776|MTA2_HUMAN	1	0	0	1	0	0	0	0	0	0	0	0
REV__sp|O94916|NFAT5_HUMAN	0	2	0	0	0	0	0	0	0	0	0	0
REV__sp|O95477|ABCA1_HUMAN	0	1	1	0	1	0	0	1	1	2	2	1
REV__sp|O95613|PCNT_HUMAN	1	0	0	0	0	1	0	0	0	0	0	0
REV__sp|P02462|CO4A1_HUMAN	0	0	0	0	0	0	1	0	0	0	0	0
REV__sp|P08123|CO1A2_HUMAN	0	0	0	1	0	0	0	0	0	0	0	0
REV__sp|P11717|MPRI_HUMAN	0	0	0	0	0	0	0	0	0	0	0	0
REV__sp|P20585|MSH3_HUMAN	0	0	0	0	0	0	0	0	0	0	0	0
REV__sp|P33241|LSP1_HUMAN	1	0	0	1	0	0	1	0	0	0	0	0
REV__sp|P33991|MCM4_HUMAN;REV__sp|Q9UJA3|MCM8_HUMAN;REV__sp|Q9NXL9|MCM9_HUMAN	0	0	0	0	0	0	1	0	0	2	0	0
REV__sp|P40939|ECHA_HUMAN	0	0	0	0	1	0	0	0	0	0	1	0
REV__sp|P41586|PACR_HUMAN	1	0	0	2	0	0	1	0	0	0	0	0
REV__sp|P46782|RS5_HUMAN	0	0	0	0	0	0	0	0	0	1	0	0
REV__sp|P48736|PK3CG_HUMAN	1	0	0	1	0	0	0	0	0	0	0	0
REV__sp|P49326|FMO5_HUMAN	1	0	0	0	1	0	0	0	0	1	0	0
REV__sp|P51572|BAP31_HUMAN	0	0	0	0	0	0	1	0	0	0	0	0
REV__sp|P53041|PPP5_HUMAN	0	0	0	0	0	0	0	0	0	1	0	0
REV__sp|P54278|PMS2_HUMAN	1	1	0	1	1	0	0	0	0	0	0	0
REV__sp|P55286|CADH8_HUMAN	1	1	1	1	1	1	1	2	0	1	0	2
REV__sp|P62829|RL23_HUMAN	0	0	0	1	0	0	0	0	0	0	0	0
REV__sp|Q07954|LRP1_HUMAN	1	1	0	2	1	0	1	0	0	1	0	0
REV__sp|Q08188|TGM3_HUMAN	0	0	0	0	0	0	0	0	0	0	0	0
REV__sp|Q08E93|F27E3_HUMAN	0	0	0	0	0	0	1	1	0	0	1	0
REV__sp|Q09666|AHNK_HUMAN	2	0	0	1	0	0	2	0	0	1	0	0
REV__sp|Q10570|CPSF1_HUMAN	2	3	3	1	2	3	0	0	0	0	0	0
REV__sp|Q12802|AKP13_HUMAN	2	3	0	4	4	0	1	1	0	1	1	0
REV__sp|Q13201|MMRN1_HUMAN	1	0	1	1	0	0	0	0	0	0	0	0
REV__sp|Q13451|FKBP5_HUMAN	0	0	0	0	0	0	0	0	0	1	0	0
REV__sp|Q13535|ATR_HUMAN	1	0	0	1	0	0	0	0	0	0	1	0
REV__sp|Q14011|CIRBP_HUMAN	0	0	0	1	0	0	0	0	0	0	0	0
REV__sp|Q14703|MBTP1_HUMAN	0	0	0	0	0	0	1	0	0	0	0	0
REV__sp|Q14746|COG2_HUMAN	2	0	0	0	0	0	1	0	0	0	0	0
REV__sp|Q15043|S39AE_HUMAN	0	0	0	0	0	0	1	0	0	0	0	0
REV__sp|Q15149|PLEC_HUMAN	0	0	0	0	0	0	0	0	0	1	0	0
REV__sp|Q16134|ETFD_HUMAN	3	0	0	1	0	0	0	0	0	0	0	0
REV__sp|Q2TAY7|SMU1_HUMAN	1	0	0	1	0	0	1	0	0	1	0	0
REV__sp|Q32P51|RA1L2_HUMAN;REV__sp|P09651|ROA1_HUMAN	0	0	0	0	0	0	1	0	0	0	0	0
REV__sp|Q4ADV7|RIC1_HUMAN	0	0	0	0	0	0	2	0	0	0	0	0
REV__sp|Q569K6|CC157_HUMAN	0	0	0	0	0	0	1	0	0	1	0	0
REV__sp|Q5BJF6|ODFP2_HUMAN	0	0	0	0	0	0	1	0	0	1	0	0
REV__sp|Q5H9K5|ZMAT1_HUMAN	0	0	0	2	0	0	0	0	0	0	0	0
REV__sp|Q5JRX3|PREP_HUMAN	0	0	0	0	0	0	0	0	0	0	0	0
REV__sp|Q5VST9|OBSCN_HUMAN	0	0	0	0	0	0	1	0	0	0	0	0
REV__sp|Q5VZ66|JKIP3_HUMAN	2	1	1	1	1	0	1	1	1	0	0	0
REV__sp|Q6NVY1|HIBCH_HUMAN	0	0	0	0	0	0	0	0	0	1	0	0
REV__sp|Q6NXN4|D19P1_HUMAN;REV__sp|Q6NUT2|D19L2_HUMAN	0	0	0	1	0	0	0	0	0	1	0	0
REV__sp|Q6ZTR5|CFA47_HUMAN	0	0	0	0	0	0	0	0	0	1	0	0
REV__sp|Q6ZU45|CL20A_HUMAN	0	0	0	0	0	0	1	0	0	0	0	0
REV__sp|Q6ZUJ8|BCAP_HUMAN	0	0	0	0	0	0	0	0	0	0	0	0
REV__sp|Q6ZV50|RFX8_HUMAN	0	0	0	0	0	0	1	0	0	0	0	0
REV__sp|Q7KZI7|MARK2_HUMAN;REV__sp|P27448|MARK3_HUMAN	0	0	0	0	0	0	1	0	0	2	0	0
REV__sp|Q7L014|DDX46_HUMAN	0	0	0	0	0	0	0	0	0	1	0	0
REV__sp|Q7Z2W7|TRPM8_HUMAN	0	0	0	0	0	0	1	0	0	0	0	0
REV__sp|Q7Z5P4|DHB13_HUMAN	0	0	0	0	0	0	1	0	0	0	0	0
REV__sp|Q7Z5P9|MUC19_HUMAN	0	0	0	1	0	0	0	0	0	0	0	0
REV__sp|Q7Z794|K2C1B_HUMAN;REV__CON__Q7Z794	0	1	0	0	0	0	0	0	0	0	0	0
REV__sp|Q86VS8|HOOK3_HUMAN	6	9	8	9	9	5	7	11	8	7	8	7
REV__sp|Q86WA8|LONP2_HUMAN	1	0	0	1	0	0	0	0	0	0	0	0
REV__sp|Q86WG5|MTMRD_HUMAN	0	0	0	0	0	0	0	2	0	0	1	2
REV__sp|Q86X52|CHSS1_HUMAN	0	0	0	0	0	0	0	0	0	0	0	0
REV__sp|Q86YD1|PTOV1_HUMAN;REV__sp|Q71SY5|MED25_HUMAN	0	0	0	0	0	0	0	0	0	0	0	0
REV__sp|Q86YT6|MIB1_HUMAN	1	0	0	0	0	0	0	0	2	0	1	0
REV__sp|Q8IVL1|NAV2_HUMAN	0	0	0	0	0	0	1	0	0	0	0	0
REV__sp|Q8IWJ2|GCC2_HUMAN	0	0	0	0	0	0	0	2	0	1	1	0
REV__sp|Q8IWV8|UBR2_HUMAN	0	0	0	0	0	0	0	0	0	0	0	0
REV__sp|Q8IX12|CCAR1_HUMAN	0	0	0	2	0	0	0	0	0	3	0	0
REV__sp|Q8IY33|MILK2_HUMAN	1	0	0	2	0	0	0	0	0	0	0	0
REV__sp|Q8IZT9|FAM9C_HUMAN	1	0	0	0	0	0	0	0	0	0	0	0
REV__sp|Q8N5H7|SH2D3_HUMAN	1	1	0	2	2	0	0	0	0	1	0	0
REV__sp|Q8N944|AMER3_HUMAN	3	0	1	1	1	3	5	2	1	2	3	0
REV__sp|Q8NEZ3|WDR19_HUMAN	2	0	0	1	0	0	0	0	0	1	0	0
REV__sp|Q8NEZ4|KMT2C_HUMAN	1	0	0	1	0	0	0	0	0	0	0	0
REV__sp|Q8TC20|CAGE1_HUMAN	0	0	0	0	0	0	1	0	0	0	0	0
REV__sp|Q8TEU7|RPGF6_HUMAN	1	0	4	0	1	0	1	0	0	0	0	0
REV__sp|Q8WVT3|TPC12_HUMAN	0	0	0	0	0	0	0	0	0	1	0	0
REV__sp|Q8WXH0|SYNE2_HUMAN	2	0	2	1	2	2	1	1	0	0	0	0
REV__sp|Q8WZ42|TITIN_HUMAN	2	1	0	3	2	0	1	1	0	2	1	0
REV__sp|Q8WZ79|DNS2B_HUMAN	1	0	0	0	0	0	0	0	0	0	0	0
REV__sp|Q8WZA9|IRGQ_HUMAN	0	0	0	0	0	0	1	0	0	0	0	0
REV__sp|Q92611|EDEM1_HUMAN	0	0	0	0	0	0	1	0	0	0	0	0
REV__sp|Q92817|EVPL_HUMAN	2	2	0	0	0	0	1	1	5	1	1	2
REV__sp|Q92823|NRCAM_HUMAN	0	0	0	0	0	0	0	0	0	0	0	0
REV__sp|Q92859|NEO1_HUMAN	1	0	0	0	0	0	0	0	0	0	0	0
REV__sp|Q969S9|RRF2M_HUMAN	1	0	0	1	0	0	3	0	0	0	0	0
REV__sp|Q96E14|RMI2_HUMAN	0	0	0	0	0	0	0	0	0	1	0	0
REV__sp|Q96EN8|MOCOS_HUMAN	0	0	0	1	0	0	0	0	0	0	0	0
REV__sp|Q96LA8|ANM6_HUMAN	0	0	0	1	0	0	0	0	0	0	0	0
REV__sp|Q96LB4|VATG3_HUMAN	0	0	0	0	0	0	0	0	0	1	0	0
REV__sp|Q96M83|CCDC7_HUMAN	0	2	1	0	0	0	1	1	2	0	1	1
REV__sp|Q96QT6|PHF12_HUMAN	0	0	0	0	0	0	0	0	0	1	0	0
REV__sp|Q96QU1|PCD15_HUMAN	1	0	0	0	0	0	0	0	0	0	0	0
REV__sp|Q96SF7|TBX15_HUMAN	0	0	0	0	0	0	0	0	0	0	0	0
REV__sp|Q9BQS8|FYCO1_HUMAN	0	0	0	0	0	0	1	1	0	0	1	0
REV__sp|Q9BT92|TCHP_HUMAN	1	0	0	0	0	0	0	0	0	1	0	0
REV__sp|Q9BUQ8|DDX23_HUMAN	1	0	0	0	0	0	0	0	0	0	0	0
REV__sp|Q9BX26|SYCP2_HUMAN	0	0	0	1	0	0	0	0	0	2	0	0
REV__sp|Q9BYV9|BACH2_HUMAN	2	0	0	2	0	0	0	0	0	0	0	0
REV__sp|Q9BYW2|SETD2_HUMAN	0	0	0	1	0	0	1	0	0	0	0	0
REV__sp|Q9GZM8|NDEL1_HUMAN	0	0	0	2	0	0	1	0	0	1	0	0
REV__sp|Q9H0E2|TOLIP_HUMAN	0	0	0	0	0	0	0	1	1	0	0	0
REV__sp|Q9H0I9|TKTL2_HUMAN	0	0	0	0	0	0	0	0	1	1	0	0
REV__sp|Q9H223|EHD4_HUMAN	0	0	0	0	0	0	0	0	0	0	0	0
REV__sp|Q9H251|CAD23_HUMAN	1	0	0	1	0	0	0	0	0	0	0	0
REV__sp|Q9H269|VPS16_HUMAN	2	0	2	0	0	2	1	0	1	0	0	0
REV__sp|Q9H2G2|SLK_HUMAN	0	0	0	1	0	0	0	0	0	0	2	0
REV__sp|Q9H2K2|TNKS2_HUMAN	0	0	0	1	0	0	0	0	0	0	0	0
REV__sp|Q9H4I2|ZHX3_HUMAN	0	0	0	0	0	0	0	0	0	0	0	0
REV__sp|Q9H939|PPIP2_HUMAN	1	0	0	0	0	0	0	0	0	0	0	0
REV__sp|Q9HC84|MUC5B_HUMAN	0	0	0	0	0	0	0	0	0	1	0	0
REV__sp|Q9NQA5|TRPV5_HUMAN	0	0	1	0	0	0	1	0	0	0	1	1
REV__sp|Q9NQB0|TF7L2_HUMAN	0	0	0	1	0	0	0	0	0	1	0	0
REV__sp|Q9NQX3|GEPH_HUMAN	0	0	0	1	0	0	0	0	0	0	0	0
REV__sp|Q9NR00|TCIM_HUMAN	7	2	2	5	4	3	4	6	2	2	1	3
REV__sp|Q9NVU7|SDA1_HUMAN	0	0	0	0	0	0	0	0	0	1	0	0
REV__sp|Q9P013|CWC15_HUMAN	0	0	0	0	0	0	1	0	0	0	0	0
REV__sp|Q9P217|ZSWM5_HUMAN	0	0	0	0	0	0	1	0	0	0	0	0
REV__sp|Q9P275|UBP36_HUMAN	1	1	0	2	2	0	0	1	0	0	0	0
REV__sp|Q9UBC5|MYO1A_HUMAN	0	0	0	0	1	0	0	1	0	0	0	0
REV__sp|Q9UEF7|KLOT_HUMAN	0	0	0	1	0	0	0	0	0	0	0	0
REV__sp|Q9UJW2|TINAG_HUMAN	1	0	0	0	0	0	0	0	0	0	0	0
REV__sp|Q9UK61|TASOR_HUMAN	0	0	0	1	0	0	0	0	0	0	0	0
REV__sp|Q9UKI8|TLK1_HUMAN	1	1	0	2	1	1	0	1	1	2	2	1
REV__sp|Q9UQQ2|SH2B3_HUMAN	0	0	0	0	0	0	0	0	0	1	0	0
REV__sp|Q9Y222|DMTF1_HUMAN	0	0	0	2	0	0	0	0	0	0	0	0
REV__sp|Q9Y295|DRG1_HUMAN	0	0	0	0	0	1	2	0	2	1	0	1
REV__sp|Q9Y2C9|TLR6_HUMAN	0	0	0	1	0	0	1	0	0	1	0	0
REV__sp|Q9Y2J4|AMOL2_HUMAN	1	0	1	1	0	1	0	0	0	0	0	0
REV__sp|Q9Y572|RIPK3_HUMAN	0	0	0	0	0	0	0	0	0	0	0	0
REV__sp|Q9Y613|FHOD1_HUMAN	1	0	0	0	0	0	0	0	0	0	0	0
REV__sp|Q9Y692|GMEB1_HUMAN	0	0	0	0	0	0	0	0	0	0	0	0
REV__sp|Q9Y697|NFS1_HUMAN	0	0	0	0	0	0	0	0	0	0	0	0
sp|A0A096LP01|SIM26_HUMAN	1	0	0	0	0	0	0	0	0	0	0	0
sp|A0A0B4J2F0|PIOS1_HUMAN	2	0	0	3	6	0	0	0	0	1	0	0
sp|A0AVT1|UBA6_HUMAN	0	0	0	0	0	2	11	9	28	20	18	31
sp|A0FGR8|ESYT2_HUMAN	13	17	19	12	17	13	4	5	7	0	4	3
sp|A0PJW6|TM223_HUMAN	3	4	7	6	8	3	0	0	1	0	0	0
sp|A1A4Y4|IRGM_HUMAN	1	0	0	0	0	0	0	0	0	0	0	0
sp|A1L0T0|ILVBL_HUMAN	22	20	30	10	15	17	4	7	11	2	6	7
sp|A2A3N6|PIPSL_HUMAN	0	0	0	2	0	0	1	0	0	1	0	0
sp|A2RRP1|NBAS_HUMAN	15	34	18	4	36	16	0	2	3	0	5	3
sp|A3KMH1|VWA8_HUMAN	34	31	39	9	17	6	0	1	1	0	0	0
sp|A3KN83|SBNO1_HUMAN	0	0	0	0	0	0	3	0	0	0	0	0
sp|A4D1E9|GTPBA_HUMAN	16	21	20	9	7	7	0	1	2	0	0	0
sp|A4D2G3|O2A25_HUMAN	0	0	0	0	0	0	0	0	0	1	0	0
sp|A5PLL7|TM189_HUMAN	3	6	7	1	3	2	1	3	2	1	2	1
sp|A5YKK6|CNOT1_HUMAN	7	36	16	11	18	7	37	41	40	25	29	26
sp|A6H8Y1|BDP1_HUMAN	0	0	0	0	0	0	0	0	0	0	0	0
sp|A6NDG6|PGP_HUMAN	0	0	0	0	0	0	7	6	6	3	3	6
sp|A6NDU8|CE051_HUMAN	1	1	1	2	1	1	6	5	4	5	2	2
sp|A6NHL2|TBAL3_HUMAN	1	1	1	1	0	1	1	2	2	1	2	1
sp|A6NHR9|SMHD1_HUMAN	0	2	3	0	0	4	17	22	26	11	5	9
sp|A6NJ78|MET15_HUMAN;sp|P0C7V9|ME15P_HUMAN	12	7	13	9	5	8	0	0	2	0	0	1
sp|A6NKF1|SAC31_HUMAN	0	0	0	0	0	0	1	0	0	2	0	0
sp|A6NKT7|RGPD3_HUMAN;sp|Q7Z3J3|RGPD4_HUMAN	0	0	0	1	0	1	1	2	1	1	2	2
sp|A8MQ03|CRTP1_HUMAN	0	0	0	3	2	0	0	0	0	0	0	0
sp|A8MTT3|CEBOS_HUMAN	2	1	1	0	5	2	0	0	0	0	0	0
sp|A8MXV4|NUD19_HUMAN	3	2	2	3	2	1	0	0	0	0	0	0
sp|A9UHW6|MI4GD_HUMAN	0	0	0	0	0	0	0	0	0	1	1	0
sp|A9Z1Z3|FR1L4_HUMAN	0	0	0	0	0	0	1	0	1	1	0	1
sp|B7ZAP0|RBG10_HUMAN	0	0	0	0	0	0	0	0	0	1	0	0
sp|C9JLW8|MCRI1_HUMAN	0	0	1	0	0	0	1	2	3	0	0	0
sp|E9PRG8|CK098_HUMAN	0	1	0	1	1	1	1	1	1	1	2	1
sp|L0R6Q1|S35U4_HUMAN	11	7	9	9	11	8	6	3	5	4	4	2
sp|L0R8F8|MIDUO_HUMAN	2	3	4	1	2	1	0	1	0	0	0	0
sp|O00115|DNS2A_HUMAN	0	0	0	0	0	0	1	1	0	0	0	0
sp|O00116|ADAS_HUMAN	45	54	65	48	68	71	12	23	17	17	21	19
sp|O00124|UBXN8_HUMAN	1	1	1	1	0	0	1	0	0	0	0	0
sp|O00139|KIF2A_HUMAN	0	5	4	4	6	8	7	6	5	5	8	6
sp|O00142|KITM_HUMAN	0	0	0	2	1	1	0	0	0	0	0	0
sp|O00148|DX39A_HUMAN	0	0	0	3	0	1	35	8	6	40	9	7
sp|O00151|PDLI1_HUMAN	2	0	1	4	5	7	7	11	16	12	14	25
sp|O00154|BACH_HUMAN	0	0	0	0	0	1	7	2	4	7	10	5
sp|O00159|MYO1C_HUMAN	18	31	40	35	49	49	29	47	66	43	44	52
sp|O00161|SNP23_HUMAN	11	22	22	14	18	15	8	17	13	9	9	7
sp|O00165|HAX1_HUMAN	10	6	13	12	15	20	0	1	3	5	5	5
sp|O00170|AIP_HUMAN	1	0	2	1	1	1	10	11	12	4	7	10
sp|O00178|GTPB1_HUMAN	0	0	0	2	0	1	1	1	3	2	4	2
sp|O00180|KCNK1_HUMAN	1	2	4	1	2	3	0	0	0	0	0	0
sp|O00186|STXB3_HUMAN	9	8	8	11	13	13	1	3	5	3	4	7
sp|O00193|SMAP_HUMAN	0	0	0	0	0	0	3	2	3	2	3	3
sp|O00194|RB27B_HUMAN	2	1	1	3	4	2	2	1	1	1	2	2
sp|O00203|AP3B1_HUMAN;sp|Q13367|AP3B2_HUMAN	2	0	0	1	0	0	23	0	0	8	0	0
sp|O00214|LEG8_HUMAN	1	0	0	0	0	0	0	0	0	0	0	0
sp|O00217|NDUS8_HUMAN	11	14	17	5	5	6	4	7	5	0	0	0
sp|O00220|TR10A_HUMAN	0	2	2	1	5	4	0	0	0	0	1	0
sp|O00231|PSD11_HUMAN	1	4	4	5	4	0	27	24	26	23	24	21
sp|O00232|PSD12_HUMAN	0	0	0	2	0	0	20	20	22	16	16	14
sp|O00233|PSMD9_HUMAN	0	0	0	0	0	0	3	6	6	4	6	5
sp|O00258|WRB_HUMAN	2	1	1	1	1	1	0	1	0	0	0	0
sp|O00264|PGRC1_HUMAN	9	10	12	10	9	6	7	7	6	4	4	4
sp|O00267|SPT5H_HUMAN	0	0	0	0	0	2	18	28	18	12	35	25
sp|O00273|DFFA_HUMAN	0	0	0	0	0	0	8	8	8	6	5	7
sp|O00291|HIP1_HUMAN	3	0	2	0	0	0	0	0	0	0	0	0
sp|O00299|CLIC1_HUMAN	9	8	8	11	10	10	22	21	25	21	21	19
sp|O00303|EIF3F_HUMAN	2	5	4	4	3	3	13	17	17	12	12	10
sp|O00330|ODPX_HUMAN	16	13	12	9	9	10	1	2	2	0	0	0
sp|O00399|DCTN6_HUMAN	0	0	0	0	0	0	1	2	0	1	1	0
sp|O00400|ACATN_HUMAN	1	1	2	3	1	0	0	0	0	0	0	0
sp|O00410|IPO5_HUMAN	35	40	65	43	47	53	55	53	79	54	60	70
sp|O00411|RPOM_HUMAN	62	56	58	13	32	24	3	6	6	0	2	1
sp|O00422|SAP18_HUMAN	0	0	0	0	0	0	2	6	4	2	5	3
sp|O00425|IF2B3_HUMAN	16	17	19	14	14	15	16	16	24	13	15	17
sp|O00429|DNM1L_HUMAN	2	5	12	12	2	5	13	13	24	21	13	21
sp|O00443|P3C2A_HUMAN	0	10	4	1	3	2	1	7	5	0	6	1
sp|O00461|GOLI4_HUMAN	33	18	31	25	15	26	7	7	9	3	2	1
sp|O00468|AGRIN_HUMAN	10	15	10	32	37	19	3	4	2	10	19	10
sp|O00469|PLOD2_HUMAN	35	40	44	19	13	20	23	28	36	10	12	8
sp|O00471|EXOC5_HUMAN	0	0	0	1	0	1	1	1	0	1	0	0
sp|O00483|NDUA4_HUMAN	5	3	3	2	3	3	2	3	3	2	2	3
sp|O00487|PSDE_HUMAN	0	2	3	3	3	2	9	10	12	8	8	13
sp|O00488|ZN593_HUMAN	1	1	1	0	2	2	2	1	2	2	2	1
sp|O00499|BIN1_HUMAN	0	0	0	0	0	0	1	2	3	3	3	5
sp|O00505|IMA4_HUMAN	0	0	0	0	0	0	6	7	8	5	5	4
sp|O00541|PESC_HUMAN	0	4	6	0	2	3	12	15	18	7	10	10
sp|O00560|SDCB1_HUMAN	7	4	6	3	3	1	7	4	8	5	3	2
sp|O00567|NOP56_HUMAN	8	12	17	13	17	20	32	25	32	26	27	25
sp|O00571|DDX3X_HUMAN;sp|Q9NQI0|DDX4_HUMAN	24	29	0	27	30	0	43	45	0	40	37	0
sp|O00592|PODXL_HUMAN	12	16	9	27	30	34	6	3	5	11	12	12
sp|O00622|CYR61_HUMAN	1	5	3	5	6	4	0	1	4	3	2	1
sp|O00623|PEX12_HUMAN	1	2	0	0	0	0	0	0	0	0	0	0
sp|O00625|PIR_HUMAN	0	0	0	0	0	0	9	5	5	1	2	4
sp|O00629|IMA3_HUMAN	2	2	6	1	4	8	12	15	17	10	13	13
sp|O00743|PPP6_HUMAN	0	0	0	0	0	0	8	7	9	4	6	9
sp|O00746|NDKM_HUMAN	4	1	0	0	0	0	0	0	1	0	0	0
sp|O00754|MA2B1_HUMAN	0	0	1	0	0	0	1	0	0	0	0	0
sp|O00762|UBE2C_HUMAN	0	1	0	0	0	0	5	5	7	0	3	2
sp|O00763|ACACB_HUMAN	1	0	1	0	0	1	0	0	0	0	1	1
sp|O00764|PDXK_HUMAN	0	0	0	0	1	1	9	7	13	10	8	10
sp|O00767|ACOD_HUMAN	6	9	10	2	4	1	2	2	4	0	1	1
sp|O14493|CLD4_HUMAN;sp|O95484|CLD9_HUMAN;sp|P56747|CLD6_HUMAN;sp|O15551|CLD3_HUMAN	0	0	0	2	2	0	0	0	0	0	0	0
sp|O14497|ARI1A_HUMAN	0	2	0	0	0	0	4	4	0	2	8	1
sp|O14521|DHSD_HUMAN	2	3	2	2	2	2	0	1	1	0	0	0
sp|O14522|PTPRT_HUMAN	1	0	0	0	0	0	0	0	0	0	0	0
sp|O14530|TXND9_HUMAN	0	0	0	0	0	0	2	6	2	1	6	5
sp|O14548|COX7R_HUMAN	5	5	5	0	1	1	1	0	1	0	0	0
sp|O14561|ACPM_HUMAN	6	8	8	4	6	4	3	4	3	2	3	2
sp|O14562|UBFD1_HUMAN	0	0	0	0	0	0	2	1	0	4	1	0
sp|O14569|C56D2_HUMAN	5	8	6	5	7	7	0	0	0	1	0	1
sp|O14579|COPE_HUMAN	1	9	13	5	7	11	14	13	14	18	13	14
sp|O14617|AP3D1_HUMAN	0	1	1	0	0	0	10	13	15	3	6	4
sp|O14618|CCS_HUMAN	0	0	0	0	0	0	3	0	3	2	0	3
sp|O14646|CHD1_HUMAN;sp|O14647|CHD2_HUMAN;sp|Q9HCK8|CHD8_HUMAN	0	0	0	0	0	0	4	0	0	1	0	0
sp|O14653|GOSR2_HUMAN	8	9	10	5	4	2	1	5	2	1	1	1
sp|O14656|TOR1A_HUMAN	3	1	5	5	6	7	2	2	4	2	4	4
sp|O14657|TOR1B_HUMAN	3	2	3	5	1	3	1	2	6	2	1	2
sp|O14662|STX16_HUMAN	0	4	3	4	3	5	0	0	3	0	1	0
sp|O14672|ADA10_HUMAN	19	24	30	9	13	8	3	5	7	1	1	1
sp|O14681|EI24_HUMAN	2	1	4	0	1	2	1	1	0	0	0	0
sp|O14683|P5I11_HUMAN	0	0	0	1	0	0	0	0	0	0	0	0
sp|O14684|PTGES_HUMAN	5	3	4	9	13	11	1	1	1	5	5	3
sp|O14732|IMPA2_HUMAN	0	0	0	0	0	0	2	0	0	1	1	0
sp|O14734|ACOT8_HUMAN	2	2	5	9	6	9	1	2	1	3	2	1
sp|O14735|CDIPT_HUMAN	11	12	12	7	8	8	4	7	6	4	3	3
sp|O14737|PDCD5_HUMAN	1	1	1	2	4	1	9	11	12	8	10	11
sp|O14744|ANM5_HUMAN	0	1	0	1	2	0	16	21	29	16	9	19
sp|O14745|NHRF1_HUMAN	2	0	2	4	4	4	5	2	3	3	3	2
sp|O14773|TPP1_HUMAN	2	0	0	0	0	0	2	1	0	3	1	1
sp|O14776|TCRG1_HUMAN	3	0	0	5	0	0	13	0	0	3	0	0
sp|O14777|NDC80_HUMAN	0	0	0	0	0	0	2	0	0	0	0	0
sp|O14786|NRP1_HUMAN	14	46	56	7	7	9	6	12	25	0	0	1
sp|O14787|TNPO2_HUMAN	0	0	0	0	0	0	0	1	2	0	0	0
sp|O14810|CPLX1_HUMAN	0	0	0	0	0	0	0	0	0	0	0	0
sp|O14818|PSA7_HUMAN;sp|Q8TAA3|PSMA8_HUMAN	6	7	7	6	8	7	20	25	20	21	21	17
sp|O14828|SCAM3_HUMAN	15	21	25	14	18	25	7	8	12	4	2	5
sp|O14874|BCKD_HUMAN	6	6	6	5	3	3	0	0	0	0	0	0
sp|O14880|MGST3_HUMAN	25	28	31	24	27	31	4	7	8	3	10	6
sp|O14893|GEMI2_HUMAN	0	1	1	1	1	2	1	1	1	2	2	3
sp|O14907|TX1B3_HUMAN	1	1	2	1	1	1	3	2	2	2	4	2
sp|O14908|GIPC1_HUMAN;sp|Q8TF64|GIPC3_HUMAN	5	1	2	3	4	9	5	11	14	5	9	10
sp|O14920|IKKB_HUMAN	0	0	0	0	0	0	0	0	0	1	0	1
sp|O14925|TIM23_HUMAN;sp|Q5SRD1|TI23B_HUMAN	14	16	15	8	11	11	4	5	4	2	5	4
sp|O14929|HAT1_HUMAN	0	0	0	0	1	0	7	8	9	5	7	5
sp|O14936|CSKP_HUMAN	4	7	1	8	8	5	1	1	4	4	1	2
sp|O14949|QCR8_HUMAN	5	4	6	2	3	3	2	2	2	0	2	2
sp|O14950|ML12B_HUMAN	0	0	0	0	0	0	1	0	0	1	0	0
sp|O14964|HGS_HUMAN	1	1	0	2	2	2	7	10	9	6	3	3
sp|O14966|RAB7L_HUMAN	3	5	3	4	4	3	1	1	0	0	2	0
sp|O14967|CLGN_HUMAN	0	1	0	10	9	13	0	0	0	1	1	1
sp|O14972|DSCR3_HUMAN	0	0	0	1	0	0	1	1	1	1	2	1
sp|O14974|MYPT1_HUMAN	0	2	12	3	11	10	6	6	18	10	16	26
sp|O14975|S27A2_HUMAN	1	3	6	7	9	12	0	1	2	1	2	3
sp|O14979|HNRDL_HUMAN	2	5	6	5	5	6	13	10	13	9	8	9
sp|O14980|XPO1_HUMAN	14	25	24	19	18	12	67	55	73	53	53	64
sp|O14981|BTAF1_HUMAN	0	0	0	0	0	0	3	5	3	3	3	4
sp|O14983|AT2A1_HUMAN	1	0	0	0	0	0	0	0	0	1	0	0
sp|O15016|TRI66_HUMAN	0	0	1	1	1	1	0	1	0	0	0	0
sp|O15020|SPTN2_HUMAN	10	19	15	10	26	24	14	13	6	9	28	13
sp|O15027|SC16A_HUMAN	0	4	0	6	9	4	5	8	8	15	21	13
sp|O15031|PLXB2_HUMAN;sp|O60486|PLXC1_HUMAN	55	0	0	54	0	0	8	0	0	14	0	0
sp|O15042|SR140_HUMAN	0	0	0	0	0	0	9	14	16	8	18	21
sp|O15067|PUR4_HUMAN	2	2	3	0	4	1	50	46	50	18	40	40
sp|O15075|DCLK1_HUMAN	0	0	0	0	0	0	0	0	0	0	0	0
sp|O15078|CE290_HUMAN	0	0	0	1	0	0	0	0	0	0	0	0
sp|O15084|ANR28_HUMAN	0	0	0	0	0	0	2	3	4	4	3	4
sp|O15091|MRPP3_HUMAN	18	18	20	14	12	8	3	2	2	2	0	0
sp|O15118|NPC1_HUMAN	7	14	11	7	13	9	3	7	5	4	6	5
sp|O15120|PLCB_HUMAN	0	0	0	5	4	4	0	0	0	1	1	0
sp|O15121|DEGS1_HUMAN	10	8	14	4	7	8	2	2	3	1	3	2
sp|O15126|SCAM1_HUMAN	8	7	8	9	8	8	2	3	3	3	3	4
sp|O15127|SCAM2_HUMAN	3	4	1	4	1	4	1	2	3	0	2	0
sp|O15143|ARC1B_HUMAN	3	6	7	3	5	6	6	9	13	6	10	11
sp|O15144|ARPC2_HUMAN	10	12	15	14	13	19	21	18	22	27	18	35
sp|O15145|ARPC3_HUMAN	4	8	5	7	8	6	13	10	11	16	14	8
sp|O15155|BET1_HUMAN	2	4	3	2	4	4	2	2	2	1	2	2
sp|O15160|RPAC1_HUMAN	1	1	3	1	2	5	6	2	3	2	1	5
sp|O15162|PLS1_HUMAN	1	1	0	4	2	2	0	0	0	3	1	2
sp|O15173|PGRC2_HUMAN	18	30	33	28	39	31	12	18	16	16	25	23
sp|O15182|CETN3_HUMAN	0	0	0	0	0	0	1	0	0	0	0	0
sp|O15195|VILL_HUMAN	1	0	0	0	0	0	0	0	0	0	0	0
sp|O15212|PFD6_HUMAN	0	0	0	1	1	0	2	5	5	3	6	7
sp|O15213|WDR46_HUMAN	0	0	0	0	0	0	3	0	0	0	0	0
sp|O15226|NKRF_HUMAN	0	2	2	0	0	0	3	5	8	0	0	0
sp|O15228|GNPAT_HUMAN	10	24	20	8	20	24	0	3	3	0	6	3
sp|O15230|LAMA5_HUMAN;sp|Q16787|LAMA3_HUMAN	4	0	0	44	32	0	0	0	0	17	20	0
sp|O15231|ZN185_HUMAN	0	0	0	0	11	11	1	0	0	0	0	0
sp|O15235|RT12_HUMAN	3	3	3	0	1	1	0	2	1	0	1	0
sp|O15254|ACOX3_HUMAN	5	11	11	11	23	18	0	2	2	2	2	3
sp|O15258|RER1_HUMAN	18	18	19	23	24	18	5	12	8	8	6	7
sp|O15260|SURF4_HUMAN	60	68	71	71	72	65	25	38	44	34	42	31
sp|O15269|SPTC1_HUMAN	14	10	13	14	11	14	4	3	2	3	5	4
sp|O15270|SPTC2_HUMAN	10	16	16	7	8	6	0	8	4	0	1	1
sp|O15294|OGT1_HUMAN	2	0	0	1	0	0	16	14	10	11	7	4
sp|O15305|PMM2_HUMAN	0	0	0	0	0	0	6	6	4	2	3	3
sp|O15318|RPC7_HUMAN	0	0	0	0	0	0	1	2	1	0	0	0
sp|O15320|CTGE5_HUMAN;sp|Q96PC5|MIA2_HUMAN;sp|Q96RT6|CTGE2_HUMAN;sp|Q86UF2|CTGE6_HUMAN;sp|A4D2H0|CTGEF_HUMAN;sp|A4FU28|CTGE9_HUMAN;sp|Q8IX94|CTGE4_HUMAN;sp|P0CG41|CTGE8_HUMAN;sp|Q8IX95|CTGE3_HUMAN	23	0	0	14	0	0	0	0	0	0	0	0
sp|O15321|TM9S1_HUMAN	15	16	18	14	16	12	0	0	0	0	0	0
sp|O15347|HMGB3_HUMAN	2	6	3	3	2	3	8	8	6	3	5	5
sp|O15355|PPM1G_HUMAN	0	0	0	0	0	0	9	5	8	8	10	10
sp|O15357|SHIP2_HUMAN	0	8	5	6	11	9	19	23	28	18	27	30
sp|O15371|EIF3D_HUMAN	0	0	4	0	3	4	13	19	24	18	15	17
sp|O15372|EIF3H_HUMAN	0	0	0	2	0	0	10	14	19	9	12	8
sp|O15382|BCAT2_HUMAN	15	3	16	7	5	13	3	1	3	1	0	2
sp|O15397|IPO8_HUMAN	0	0	0	3	1	0	13	4	8	16	11	11
sp|O15400|STX7_HUMAN	6	7	14	7	8	13	5	6	8	7	4	7
sp|O15427|MOT4_HUMAN	27	30	28	34	38	33	15	14	15	15	16	16
sp|O15438|MRP3_HUMAN	7	0	0	8	2	0	0	0	0	0	0	0
sp|O15439|MRP4_HUMAN	26	48	22	32	56	34	3	7	3	0	7	6
sp|O15440|MRP5_HUMAN	0	0	1	0	0	0	0	0	0	0	0	0
sp|O15446|RPA34_HUMAN	0	1	0	1	1	2	0	2	4	1	1	2
sp|O15460|P4HA2_HUMAN	17	23	28	12	16	15	9	19	20	8	11	11
sp|O15498|YKT6_HUMAN	1	4	3	4	4	2	10	8	4	4	5	2
sp|O15511|ARPC5_HUMAN	2	3	2	2	2	3	2	3	2	2	3	2
sp|O15514|RPB4_HUMAN	0	0	0	0	0	2	3	3	4	2	5	3
sp|O15523|DDX3Y_HUMAN	0	0	0	0	0	0	0	1	0	0	0	0
sp|O15533|TPSN_HUMAN	7	6	4	4	4	3	0	1	4	1	1	0
sp|O15554|KCNN4_HUMAN	0	0	0	5	9	8	0	0	0	0	0	0
sp|O43143|DHX15_HUMAN	3	19	15	6	15	20	36	44	62	43	43	44
sp|O43148|MCES_HUMAN	0	0	1	0	0	0	2	3	5	2	6	5
sp|O43149|ZZEF1_HUMAN	0	0	0	0	0	0	0	1	0	1	1	0
sp|O43156|TTI1_HUMAN	0	0	0	0	0	0	0	1	4	4	3	5
sp|O43159|RRP8_HUMAN	0	2	3	0	1	1	4	5	6	1	3	3
sp|O43169|CYB5B_HUMAN	20	16	11	14	19	4	10	9	6	5	8	8
sp|O43172|PRP4_HUMAN	0	0	0	0	1	0	7	10	11	4	5	7
sp|O43175|SERA_HUMAN	11	12	10	38	40	26	29	16	22	40	55	57
sp|O43181|NDUS4_HUMAN	4	6	7	3	3	2	1	1	2	0	1	0
sp|O43237|DC1L2_HUMAN	0	5	1	6	2	4	2	1	0	4	6	2
sp|O43242|PSMD3_HUMAN	1	2	3	5	5	4	21	32	39	25	24	32
sp|O43251|RFOX2_HUMAN;sp|Q9NWB1|RFOX1_HUMAN	0	0	0	0	0	0	0	0	0	1	0	0
sp|O43252|PAPS1_HUMAN	0	0	0	0	0	0	8	1	7	9	6	12
sp|O43264|ZW10_HUMAN	6	5	9	6	4	8	3	6	3	5	3	5
sp|O43286|B4GT5_HUMAN	6	6	0	6	6	0	1	1	0	1	1	0
sp|O43290|SNUT1_HUMAN	2	3	5	1	4	6	12	9	16	7	10	11
sp|O43292|GPAA1_HUMAN	10	10	8	5	9	9	0	2	1	1	0	1
sp|O43293|DAPK3_HUMAN	0	1	2	1	1	2	0	2	1	0	2	0
sp|O43294|TGFI1_HUMAN	0	0	0	0	0	0	1	3	2	5	3	2
sp|O43306|ADCY6_HUMAN	0	0	0	0	0	0	0	0	0	0	0	0
sp|O43314|VIP2_HUMAN	0	0	0	0	0	0	1	0	0	0	0	0
sp|O43324|MCA3_HUMAN	2	2	3	3	5	5	4	7	6	6	9	8
sp|O43390|HNRPR_HUMAN	15	17	26	18	15	27	43	36	52	49	31	49
sp|O43395|PRPF3_HUMAN	0	0	0	0	0	0	5	5	10	2	5	6
sp|O43396|TXNL1_HUMAN	1	0	1	1	2	3	12	10	12	14	12	10
sp|O43399|TPD54_HUMAN	3	5	7	12	17	12	20	23	16	22	24	17
sp|O43402|EMC8_HUMAN	5	7	6	9	8	8	2	2	1	1	3	2
sp|O43414|ERI3_HUMAN	1	0	0	0	0	0	1	2	4	3	3	1
sp|O43427|FIBP_HUMAN	0	1	1	1	2	1	1	4	4	0	2	3
sp|O43432|IF4G3_HUMAN	0	0	3	2	0	0	7	1	4	3	1	1
sp|O43447|PPIH_HUMAN	0	1	1	0	0	1	4	7	7	4	8	4
sp|O43464|HTRA2_HUMAN;sp|P83110|HTRA3_HUMAN	3	1	2	4	4	4	0	0	1	0	0	0
sp|O43488|ARK72_HUMAN;sp|Q8NHP1|ARK74_HUMAN	5	0	0	0	0	0	7	0	0	1	0	0
sp|O43491|E41L2_HUMAN	22	29	31	41	40	35	17	33	35	14	28	31
sp|O43504|LTOR5_HUMAN	1	1	0	0	1	0	0	1	0	0	1	0
sp|O43505|B4GA1_HUMAN	5	3	5	3	3	4	0	1	0	0	0	0
sp|O43521|B2L11_HUMAN	0	0	0	2	1	0	0	0	0	0	0	0
sp|O43525|KCNQ3_HUMAN	0	0	0	0	0	0	1	1	0	0	0	0
sp|O43570|CAH12_HUMAN	0	0	0	0	0	0	0	0	0	0	0	0
sp|O43583|DENR_HUMAN	0	1	1	0	0	2	5	4	5	4	4	4
sp|O43592|XPOT_HUMAN	0	0	0	0	1	0	27	27	28	29	32	25
sp|O43598|DNPH1_HUMAN	0	0	0	0	0	0	4	1	1	2	2	2
sp|O43615|TIM44_HUMAN	35	38	43	31	36	34	9	13	14	9	10	8
sp|O43617|TPPC3_HUMAN	0	1	1	0	1	1	3	3	4	2	2	3
sp|O43633|CHM2A_HUMAN	0	0	1	0	0	0	2	0	0	0	0	1
sp|O43653|PSCA_HUMAN	0	0	0	1	0	0	0	0	0	0	0	0
sp|O43657|TSN6_HUMAN	0	4	4	2	3	2	2	3	4	0	2	1
sp|O43660|PLRG1_HUMAN	0	4	5	0	3	7	6	14	12	4	9	7
sp|O43663|PRC1_HUMAN	1	1	2	3	1	6	0	5	5	2	3	7
sp|O43665|RGS10_HUMAN	0	0	0	0	0	0	1	0	0	1	0	0
sp|O43670|ZN207_HUMAN	0	5	5	2	6	4	7	8	8	5	6	7
sp|O43674|NDUB5_HUMAN	7	5	7	4	8	7	2	4	3	2	3	2
sp|O43676|NDUB3_HUMAN	5	8	5	3	3	4	1	3	2	0	2	0
sp|O43678|NDUA2_HUMAN	8	5	7	4	4	4	3	3	3	0	1	1
sp|O43681|ASNA_HUMAN	3	1	1	3	2	3	5	8	9	7	6	5
sp|O43684|BUB3_HUMAN	5	8	9	4	5	4	9	13	22	6	14	13
sp|O43707|ACTN4_HUMAN	66	58	59	84	85	92	153	147	180	155	207	202
sp|O43708|MAAI_HUMAN	1	0	1	0	0	0	1	0	0	0	0	0
sp|O43709|BUD23_HUMAN	0	1	1	0	1	0	3	3	2	0	1	1
sp|O43715|TRIA1_HUMAN	1	0	0	3	2	0	0	0	0	0	0	0
sp|O43716|GATC_HUMAN	8	5	6	7	5	5	0	1	0	1	1	0
sp|O43719|HTSF1_HUMAN	0	0	0	0	0	0	8	6	12	3	1	6
sp|O43747|AP1G1_HUMAN	5	6	7	5	7	6	9	11	14	5	8	7
sp|O43752|STX6_HUMAN	3	6	6	3	3	7	0	1	7	1	1	2
sp|O43759|SNG1_HUMAN	0	0	0	2	0	2	0	0	0	0	0	0
sp|O43760|SNG2_HUMAN	4	4	5	3	3	4	2	2	3	1	2	1
sp|O43765|SGTA_HUMAN	0	0	1	0	0	0	7	4	5	1	3	4
sp|O43768|ENSA_HUMAN	0	0	0	0	0	0	6	3	6	4	3	1
sp|O43772|MCAT_HUMAN	17	17	18	9	10	10	2	1	4	0	0	0
sp|O43776|SYNC_HUMAN	10	19	21	23	22	30	29	26	46	24	28	27
sp|O43795|MYO1B_HUMAN;sp|Q9UBC5|MYO1A_HUMAN	2	0	0	15	0	0	12	0	0	21	0	0
sp|O43805|SSNA1_HUMAN	0	0	0	0	0	0	3	2	3	2	2	0
sp|O43808|PM34_HUMAN	11	16	14	8	17	16	3	10	5	2	3	1
sp|O43809|CPSF5_HUMAN	4	7	6	5	6	8	17	21	16	16	19	13
sp|O43813|LANC1_HUMAN	0	1	0	3	4	5	3	1	2	3	5	4
sp|O43815|STRN_HUMAN	1	0	0	0	1	3	0	0	1	0	0	2
sp|O43818|U3IP2_HUMAN	0	0	0	0	0	0	6	8	5	4	6	3
sp|O43819|SCO2_HUMAN	9	14	10	5	9	10	3	5	5	0	1	1
sp|O43823|AKAP8_HUMAN	1	0	0	0	0	0	1	2	3	1	2	3
sp|O43824|GTPB6_HUMAN	12	7	12	0	0	1	0	0	0	0	0	0
sp|O43826|G6PT1_HUMAN	1	0	0	0	0	0	0	0	0	0	0	0
sp|O43837|IDH3B_HUMAN	22	21	30	27	27	34	6	9	15	3	11	12
sp|O43847|NRDC_HUMAN	0	0	0	0	0	0	21	23	24	10	21	16
sp|O43852|CALU_HUMAN	27	25	27	20	27	26	23	34	36	22	21	17
sp|O43854|EDIL3_HUMAN	42	42	57	63	71	47	21	37	44	20	38	24
sp|O43865|SAHH2_HUMAN;sp|Q96HN2|SAHH3_HUMAN	0	0	0	0	1	0	4	5	0	3	8	0
sp|O43896|KIF1C_HUMAN	0	0	0	0	0	0	1	3	0	1	4	0
sp|O43913|ORC5_HUMAN	0	1	0	0	1	2	1	2	1	1	2	1
sp|O43920|NDUS5_HUMAN	7	8	8	2	5	4	2	4	5	1	2	0
sp|O43924|PDE6D_HUMAN	0	0	0	0	0	0	1	2	2	0	1	0
sp|O43929|ORC4_HUMAN;CON__Q2YDI2	0	0	0	0	0	0	1	1	1	2	1	1
sp|O60216|RAD21_HUMAN	3	0	0	6	0	0	12	0	0	15	0	0
sp|O60220|TIM8A_HUMAN	4	3	3	5	5	3	2	3	3	1	3	3
sp|O60231|DHX16_HUMAN	0	0	3	0	2	3	11	6	12	4	3	8
sp|O60232|SSA27_HUMAN	0	0	0	0	0	0	3	4	4	4	5	1
sp|O60238|BNI3L_HUMAN;sp|Q12983|BNIP3_HUMAN	2	4	4	3	2	3	0	0	0	0	0	0
sp|O60245|PCDH7_HUMAN	4	9	12	0	8	8	0	1	2	0	2	1
sp|O60256|KPRB_HUMAN	0	0	0	0	0	0	6	5	4	5	4	3
sp|O60264|SMCA5_HUMAN	7	11	24	3	12	17	31	33	59	25	43	45
sp|O60266|ADCY3_HUMAN	0	0	0	0	0	0	1	1	1	0	0	1
sp|O60271|JIP4_HUMAN;sp|Q9UPT6|JIP3_HUMAN	0	0	0	0	0	0	14	8	14	3	3	2
sp|O60282|KIF5C_HUMAN	0	0	0	1	0	0	0	0	0	0	0	0
sp|O60287|NPA1P_HUMAN	0	14	5	4	16	11	18	36	21	10	34	16
sp|O60293|ZC3H1_HUMAN	0	0	0	0	0	0	0	4	2	1	7	1
sp|O60306|AQR_HUMAN	1	6	4	2	2	4	29	26	26	11	20	12
sp|O60313|OPA1_HUMAN	77	75	93	50	52	49	8	14	25	1	7	7
sp|O60318|GANP_HUMAN	0	0	0	0	0	0	2	0	0	2	0	0
sp|O60337|MARH6_HUMAN	2	0	2	0	0	0	0	0	0	0	0	0
sp|O60341|KDM1A_HUMAN	0	0	1	0	0	0	8	5	8	6	9	3
sp|O60343|TBCD4_HUMAN	0	0	0	0	0	0	3	0	0	3	0	0
sp|O60427|FADS1_HUMAN	20	6	11	2	2	2	1	0	1	0	0	0
sp|O60437|PEPL_HUMAN	0	0	2	20	21	32	3	0	17	29	33	23
sp|O60443|GSDME_HUMAN	0	0	1	1	2	0	3	2	5	3	3	4
sp|O60476|MA1A2_HUMAN	4	7	6	4	4	2	0	0	1	0	0	0
sp|O60488|ACSL4_HUMAN	25	23	27	8	10	13	13	14	19	1	6	3
sp|O60493|SNX3_HUMAN	4	7	5	4	4	4	7	8	11	6	8	11
sp|O60499|STX10_HUMAN	3	6	6	5	7	8	3	3	5	3	2	1
sp|O60502|OGA_HUMAN	0	0	0	0	0	0	4	6	9	8	9	12
sp|O60506|HNRPQ_HUMAN	16	26	39	22	26	38	43	43	58	33	34	39
sp|O60507|TPST1_HUMAN	1	7	4	2	0	0	0	0	0	0	0	0
sp|O60518|RNBP6_HUMAN	20	16	34	14	9	21	2	4	10	6	8	18
sp|O60524|NEMF_HUMAN	1	3	6	0	0	2	6	9	6	0	5	3
sp|O60566|BUB1B_HUMAN	0	0	0	0	0	0	1	1	5	0	0	8
sp|O60568|PLOD3_HUMAN	64	72	82	37	47	41	14	18	30	15	16	18
sp|O60573|IF4E2_HUMAN	0	1	0	0	0	0	3	2	2	0	1	0
sp|O60610|DIAP1_HUMAN	6	18	5	25	18	13	30	33	27	37	34	43
sp|O60613|SEP15_HUMAN	2	2	2	2	6	3	0	4	2	1	4	1
sp|O60637|TSN3_HUMAN	4	1	4	0	1	1	3	1	2	1	0	0
sp|O60645|EXOC3_HUMAN	2	1	3	4	4	3	0	0	2	2	2	1
sp|O60664|PLIN3_HUMAN	4	9	5	14	10	7	13	9	11	12	9	10
sp|O60669|MOT2_HUMAN	3	3	2	1	1	2	0	0	1	0	0	1
sp|O60671|RAD1_HUMAN	1	0	0	0	0	0	3	4	3	4	5	3
sp|O60683|PEX10_HUMAN	2	3	4	1	0	0	0	0	0	0	0	0
sp|O60684|IMA7_HUMAN;sp|O15131|IMA6_HUMAN	0	2	2	1	2	1	3	3	9	2	5	7
sp|O60701|UGDH_HUMAN	0	0	0	1	1	2	14	10	13	13	16	11
sp|O60716|CTND1_HUMAN	46	61	70	47	52	56	16	22	37	13	17	18
sp|O60739|EIF1B_HUMAN	1	1	1	1	1	0	1	1	1	2	2	1
sp|O60749|SNX2_HUMAN	0	3	1	3	2	0	8	9	14	13	12	16
sp|O60762|DPM1_HUMAN	32	23	25	27	23	17	10	14	12	15	12	11
sp|O60763|USO1_HUMAN	0	5	0	7	6	0	17	16	0	20	13	0
sp|O60783|RT14_HUMAN	3	3	3	2	5	2	0	1	1	0	1	0
sp|O60784|TOM1_HUMAN	0	0	0	0	0	0	3	2	2	2	0	0
sp|O60826|CCD22_HUMAN	0	0	0	1	0	0	1	1	4	3	2	4
sp|O60828|PQBP1_HUMAN	0	0	0	0	1	1	5	5	5	6	7	6
sp|O60830|TI17B_HUMAN	8	10	12	7	8	9	0	1	2	1	2	0
sp|O60831|PRAF2_HUMAN	8	7	8	6	6	7	5	3	6	5	5	4
sp|O60832|DKC1_HUMAN	1	3	6	3	4	7	9	14	26	14	16	17
sp|O60841|IF2P_HUMAN	2	2	1	3	2	6	9	14	12	8	20	18
sp|O60869|EDF1_HUMAN	6	4	5	8	4	5	6	6	5	6	5	5
sp|O60870|KIN17_HUMAN	0	0	0	0	0	0	0	0	1	1	0	0
sp|O60879|DIAP2_HUMAN	0	0	1	0	0	0	1	0	1	0	0	0
sp|O60884|DNJA2_HUMAN	0	2	1	0	2	0	4	5	7	2	5	3
sp|O60885|BRD4_HUMAN	0	0	0	0	0	0	5	0	0	2	0	0
sp|O60888|CUTA_HUMAN	1	1	2	2	1	1	7	4	7	6	7	3
sp|O60902|SHOX2_HUMAN;sp|O15266|SHOX_HUMAN	0	0	0	1	0	0	1	0	0	1	0	0
sp|O60906|NSMA_HUMAN	1	0	1	0	0	1	0	0	0	0	0	0
sp|O60925|PFD1_HUMAN	0	1	0	0	1	1	2	1	3	3	4	4
sp|O60927|PP1RB_HUMAN	0	0	0	1	0	0	3	2	1	2	2	1
sp|O60928|KCJ13_HUMAN	0	0	0	0	0	0	0	0	0	1	0	0
sp|O60936|NOL3_HUMAN	0	0	0	0	0	0	1	0	0	1	2	0
sp|O75027|ABCB7_HUMAN	50	40	52	46	35	38	1	2	2	0	0	0
sp|O75054|IGSF3_HUMAN	1	0	0	2	2	1	0	0	0	0	0	0
sp|O75063|XYLK_HUMAN	3	6	5	0	3	2	0	0	0	0	0	0
sp|O75083|WDR1_HUMAN	1	5	8	4	8	8	30	34	41	37	38	46
sp|O75110|ATP9A_HUMAN	1	0	0	0	0	1	0	0	0	0	0	0
sp|O75116|ROCK2_HUMAN	1	1	1	3	3	6	19	17	13	5	17	12
sp|O75122|CLAP2_HUMAN	1	3	1	5	3	1	8	4	1	1	6	8
sp|O75127|PTCD1_HUMAN	14	14	15	0	0	0	1	4	3	0	0	0
sp|O75131|CPNE3_HUMAN	2	2	3	8	10	10	7	5	5	10	13	11
sp|O75146|HIP1R_HUMAN	0	0	2	0	0	1	0	0	0	2	1	4
sp|O75150|BRE1B_HUMAN	0	2	3	0	0	1	7	5	20	2	2	8
sp|O75152|ZC11A_HUMAN	0	0	0	0	0	0	2	3	0	1	2	0
sp|O75153|CLU_HUMAN;sp|Q9Y5I4|PCDC2_HUMAN	0	0	0	1	0	0	26	0	41	11	0	25
sp|O75155|CAND2_HUMAN	0	0	0	0	0	0	0	0	0	1	0	0
sp|O75165|DJC13_HUMAN	28	81	56	40	46	37	26	44	36	13	22	10
sp|O75179|ANR17_HUMAN	0	1	0	0	1	0	9	7	7	2	5	6
sp|O75208|COQ9_HUMAN	10	10	12	8	7	5	1	1	3	0	0	1
sp|O75223|GGCT_HUMAN	0	0	0	0	0	0	6	4	2	3	3	4
sp|O75251|NDUS7_HUMAN	11	15	8	1	2	1	2	4	2	0	0	0
sp|O75306|NDUS2_HUMAN	48	66	57	14	12	13	8	6	6	0	1	0
sp|O75312|ZPR1_HUMAN	0	0	0	0	0	0	0	5	3	3	4	4
sp|O75323|NIPS2_HUMAN	16	21	21	11	15	12	8	9	9	5	9	5
sp|O75335|LIPA4_HUMAN;sp|Q13136|LIPA1_HUMAN;sp|O75334|LIPA2_HUMAN;sp|O75145|LIPA3_HUMAN	0	0	0	1	0	0	0	0	0	1	0	0
sp|O75340|PDCD6_HUMAN	3	3	3	4	10	6	11	18	16	12	16	8
sp|O75347|TBCA_HUMAN	1	0	0	1	1	1	6	5	7	6	10	7
sp|O75348|VATG1_HUMAN	2	2	0	3	2	0	3	3	0	5	4	0
sp|O75351|VPS4B_HUMAN;sp|Q9UN37|VPS4A_HUMAN;sp|Q6PIW4|FIGL1_HUMAN	1	0	0	0	0	0	3	0	4	2	0	3
sp|O75352|MPU1_HUMAN	16	20	18	13	20	20	4	11	8	6	10	9
sp|O75355|ENTP3_HUMAN	0	0	0	0	0	0	1	0	0	0	0	0
sp|O75367|H2AY_HUMAN;sp|Q9P0M6|H2AW_HUMAN	1	0	0	1	0	0	15	0	0	27	0	0
sp|O75368|SH3L1_HUMAN	0	0	0	0	0	0	8	5	6	10	7	8
sp|O75369|FLNB_HUMAN	88	145	173	202	223	219	211	286	305	392	495	441
sp|O75376|NCOR1_HUMAN	0	0	0	0	0	0	0	0	1	0	0	0
sp|O75379|VAMP4_HUMAN	0	0	0	0	0	0	0	0	0	0	0	0
sp|O75380|NDUS6_HUMAN	10	8	8	13	7	9	3	5	5	4	4	5
sp|O75381|PEX14_HUMAN	7	6	5	5	5	4	3	1	2	2	1	0
sp|O75390|CISY_HUMAN	89	98	116	61	71	62	15	19	22	12	12	11
sp|O75391|SPAG7_HUMAN	0	0	0	0	0	0	2	6	2	0	3	3
sp|O75394|RM33_HUMAN	2	3	3	0	0	0	0	1	1	0	0	0
sp|O75396|SC22B_HUMAN	55	54	63	43	54	61	16	20	23	14	18	19
sp|O75400|PR40A_HUMAN	0	0	0	0	0	1	13	11	16	11	11	14
sp|O75410|TACC1_HUMAN	0	0	0	0	1	1	0	0	0	0	1	1
sp|O75414|NDK6_HUMAN	3	7	7	1	6	5	1	0	1	0	1	0
sp|O75417|DPOLQ_HUMAN	0	0	0	0	0	0	1	0	0	0	0	0
sp|O75431|MTX2_HUMAN	13	16	13	13	13	13	2	2	4	1	3	2
sp|O75436|VP26A_HUMAN	0	2	4	0	4	8	5	16	20	7	15	14
sp|O75438|NDUB1_HUMAN	6	6	6	5	4	4	0	2	1	0	1	1
sp|O75439|MPPB_HUMAN	37	22	33	47	43	44	7	4	8	8	8	9
sp|O75448|MED24_HUMAN	0	1	2	1	1	1	0	1	1	0	2	2
sp|O75475|PSIP1_HUMAN	3	6	6	11	10	12	12	12	13	14	19	18
sp|O75477|ERLN1_HUMAN	17	21	15	10	21	10	2	5	4	3	7	4
sp|O75489|NDUS3_HUMAN	31	28	25	15	15	20	12	14	12	4	5	5
sp|O75494|SRS10_HUMAN;sp|Q8WXF0|SRS12_HUMAN	0	0	0	0	0	0	7	8	10	7	9	10
sp|O75521|ECI2_HUMAN	18	24	20	22	29	26	2	1	2	4	3	3
sp|O75530|EED_HUMAN	0	0	0	0	0	0	0	0	0	0	0	0
sp|O75531|BAF_HUMAN	3	3	2	3	2	1	7	11	10	7	8	9
sp|O75533|SF3B1_HUMAN	1	6	9	0	6	9	58	70	76	29	52	59
sp|O75534|CSDE1_HUMAN	4	8	13	0	2	1	20	24	26	11	14	11
sp|O75569|PRKRA_HUMAN	0	1	1	0	3	6	4	3	1	3	6	5
sp|O75592|MYCB2_HUMAN	4	11	7	12	27	20	16	20	20	9	32	22
sp|O75600|KBL_HUMAN	18	7	10	12	8	8	0	0	0	1	0	0
sp|O75607|NPM3_HUMAN	1	2	2	2	1	2	4	11	12	7	13	9
sp|O75608|LYPA1_HUMAN	2	2	5	3	1	2	2	3	1	4	2	2
sp|O75616|ERAL1_HUMAN	19	16	18	8	13	9	2	2	3	0	0	0
sp|O75629|CREG1_HUMAN	0	0	1	0	0	0	2	0	2	0	0	0
sp|O75643|U520_HUMAN	8	56	27	24	50	44	97	134	132	59	117	83
sp|O75648|MTU1_HUMAN	5	9	3	5	7	6	0	0	0	0	0	0
sp|O75663|TIPRL_HUMAN	0	0	0	0	0	0	10	7	9	12	3	6
sp|O75691|UTP20_HUMAN	5	45	25	0	6	2	25	48	40	0	13	4
sp|O75694|NU155_HUMAN	30	46	39	31	50	54	51	66	66	41	52	55
sp|O75695|XRP2_HUMAN	1	2	3	4	3	2	0	0	1	1	2	1
sp|O75717|WDHD1_HUMAN	0	0	0	0	0	0	5	10	5	0	8	5
sp|O75718|CRTAP_HUMAN	15	17	14	11	8	8	9	11	11	8	5	6
sp|O75746|CMC1_HUMAN	32	33	50	8	15	16	6	6	14	0	0	0
sp|O75751|S22A3_HUMAN	0	0	0	3	8	5	0	0	0	0	0	0
sp|O75781|PALM_HUMAN	0	0	0	1	0	0	0	0	1	0	0	0
sp|O75787|RENR_HUMAN	12	15	14	6	8	12	5	6	3	4	0	2
sp|O75792|RNH2A_HUMAN	0	0	0	0	0	0	4	1	5	5	3	4
sp|O75794|CD123_HUMAN	0	0	0	0	0	0	5	6	9	0	3	3
sp|O75817|POP7_HUMAN	0	1	1	0	1	1	1	2	2	2	3	3
sp|O75818|RPP40_HUMAN	0	0	0	0	0	1	0	3	4	1	5	0
sp|O75821|EIF3G_HUMAN	3	1	2	2	2	2	13	12	14	10	8	6
sp|O75822|EIF3J_HUMAN	5	4	5	2	2	5	12	16	21	9	10	17
sp|O75828|CBR3_HUMAN	1	1	1	0	1	0	1	1	1	2	1	1
sp|O75830|SPI2_HUMAN	0	0	0	1	0	0	0	0	0	0	0	0
sp|O75832|PSD10_HUMAN	0	0	0	0	0	0	4	7	5	5	7	5
sp|O75844|FACE1_HUMAN	40	38	44	31	42	37	4	8	8	6	4	2
sp|O75874|IDHC_HUMAN	1	0	0	0	2	2	10	1	6	18	19	21
sp|O75879|GATB_HUMAN	5	8	3	11	7	9	0	0	0	0	0	0
sp|O75880|SCO1_HUMAN	11	17	11	13	15	11	3	5	6	3	5	4
sp|O75884|RBBP9_HUMAN	0	0	0	0	0	0	1	0	0	0	0	0
sp|O75907|DGAT1_HUMAN	1	0	1	3	1	4	0	0	0	0	0	0
sp|O75909|CCNK_HUMAN	2	0	0	0	0	0	2	1	0	0	2	0
sp|O75911|DHRS3_HUMAN	1	0	0	2	0	0	0	0	0	1	0	0
sp|O75915|PRAF3_HUMAN	38	37	42	35	42	36	21	31	29	20	25	30
sp|O75925|PIAS1_HUMAN	0	0	0	0	0	0	0	0	0	1	0	0
sp|O75934|SPF27_HUMAN	0	4	2	5	4	3	8	15	12	7	7	7
sp|O75935|DCTN3_HUMAN	0	0	0	2	3	0	3	5	3	3	4	2
sp|O75937|DNJC8_HUMAN	6	2	2	6	4	4	9	6	6	9	7	5
sp|O75940|SPF30_HUMAN	0	0	0	0	1	0	3	3	2	2	5	1
sp|O75947|ATP5H_HUMAN	30	31	37	30	24	33	14	16	22	11	15	12
sp|O75955|FLOT1_HUMAN	43	24	38	33	21	19	13	15	20	10	15	11
sp|O75962|TRIO_HUMAN;sp|O60229|KALRN_HUMAN	0	0	0	14	0	0	29	0	0	38	0	0
sp|O75964|ATP5L_HUMAN	19	0	0	15	0	0	7	0	0	5	0	0
sp|O75970|MPDZ_HUMAN	1	6	0	1	2	2	0	5	4	0	2	1
sp|O75976|CBPD_HUMAN	13	24	19	13	5	8	1	10	13	0	1	0
sp|O76003|GLRX3_HUMAN	0	1	3	0	1	0	9	14	19	9	13	13
sp|O76021|RL1D1_HUMAN	3	12	15	4	5	6	14	18	27	3	7	7
sp|O76024|WFS1_HUMAN	2	2	3	2	5	4	0	0	0	0	0	0
sp|O76031|CLPX_HUMAN	53	41	49	10	20	15	7	9	13	0	3	3
sp|O76061|STC2_HUMAN	0	4	7	5	3	4	0	1	5	0	1	1
sp|O76070|SYUG_HUMAN	0	0	0	0	0	0	0	0	0	3	3	3
sp|O76094|SRP72_HUMAN	3	9	3	9	7	13	13	18	16	10	14	9
sp|O76095|JTB_HUMAN	1	0	0	2	0	0	0	0	0	0	0	0
sp|O94760|DDAH1_HUMAN	0	0	1	1	1	1	0	2	2	1	3	5
sp|O94766|B3GA3_HUMAN;sp|Q9NPZ5|B3GA2_HUMAN	10	0	0	4	0	0	4	0	0	2	0	0
sp|O94776|MTA2_HUMAN;sp|Q9BTC8|MTA3_HUMAN	1	0	0	1	0	0	16	0	0	10	0	0
sp|O94808|GFPT2_HUMAN	0	0	0	0	0	0	1	0	0	0	0	0
sp|O94822|LTN1_HUMAN	0	0	0	0	0	0	1	1	3	0	1	0
sp|O94826|TOM70_HUMAN	43	39	58	48	38	44	13	11	15	18	9	11
sp|O94829|IPO13_HUMAN	0	0	0	0	0	0	0	0	1	0	1	2
sp|O94851|MICA2_HUMAN;sp|Q7RTP6|MICA3_HUMAN	7	0	0	5	0	0	0	0	0	0	0	0
sp|O94854|K0754_HUMAN	1	1	1	3	6	5	0	1	2	1	5	5
sp|O94855|SC24D_HUMAN	1	1	2	1	0	0	8	8	9	4	1	3
sp|O94874|UFL1_HUMAN	26	32	26	22	19	20	4	13	10	4	4	4
sp|O94875|SRBS2_HUMAN	0	0	0	1	1	4	0	0	0	0	0	0
sp|O94880|PHF14_HUMAN	1	0	0	0	0	0	3	2	4	2	2	0
sp|O94888|UBXN7_HUMAN	0	1	0	0	1	1	2	2	3	2	2	2
sp|O94901|SUN1_HUMAN	2	0	1	1	0	0	1	4	4	1	1	1
sp|O94903|PLPHP_HUMAN	1	0	0	1	0	0	1	2	1	4	6	5
sp|O94905|ERLN2_HUMAN	28	9	18	22	11	26	7	2	6	4	5	5
sp|O94906|PRP6_HUMAN	3	9	9	7	8	8	28	22	21	12	14	18
sp|O94913|PCF11_HUMAN	0	0	1	0	0	1	1	2	2	0	2	0
sp|O94915|FRYL_HUMAN	0	1	0	0	0	0	1	9	5	3	3	3
sp|O94919|ENDD1_HUMAN	0	0	0	0	0	0	0	0	0	0	0	0
sp|O94923|GLCE_HUMAN	5	3	0	3	0	0	0	0	0	0	0	0
sp|O94925|GLSK_HUMAN	70	138	151	83	129	133	14	45	46	19	31	32
sp|O94929|ABLM3_HUMAN	0	0	1	3	8	8	0	0	0	1	3	2
sp|O94966|UBP19_HUMAN	0	0	0	2	0	0	2	2	0	0	5	1
sp|O94973|AP2A2_HUMAN	3	5	7	3	6	8	3	2	4	0	2	3
sp|O94979|SC31A_HUMAN	2	2	5	3	3	6	14	19	24	21	29	22
sp|O94985|CSTN1_HUMAN	1	0	4	1	0	0	0	0	0	0	0	0
sp|O95059|RPP14_HUMAN	0	0	0	0	0	0	2	2	1	2	2	1
sp|O95070|YIF1A_HUMAN	7	9	7	6	9	6	3	6	5	4	5	3
sp|O95071|UBR5_HUMAN	1	0	0	0	0	2	1	8	2	7	9	5
sp|O95084|PRS23_HUMAN	0	0	2	1	0	1	0	0	1	1	0	0
sp|O95104|SFR15_HUMAN;sp|Q9UPN6|SCAF8_HUMAN	1	0	0	1	0	0	5	0	0	3	0	0
sp|O95139|NDUB6_HUMAN	10	9	10	10	11	8	0	1	2	0	2	4
sp|O95140|MFN2_HUMAN	19	27	28	28	37	34	1	0	1	1	1	3
sp|O95155|UBE4B_HUMAN	0	0	0	0	0	0	9	12	9	5	16	15
sp|O95159|ZFPL1_HUMAN	13	10	12	13	14	15	1	2	9	1	2	4
sp|O95163|ELP1_HUMAN	0	3	2	1	6	11	12	17	23	10	24	26
sp|O95167|NDUA3_HUMAN	4	3	3	0	3	2	0	0	0	0	0	0
sp|O95168|NDUB4_HUMAN	6	4	7	4	3	4	2	4	3	0	0	0
sp|O95169|NDUB8_HUMAN	8	8	6	0	1	0	2	2	2	0	0	0
sp|O95182|NDUA7_HUMAN	8	9	7	0	0	0	0	1	2	0	0	0
sp|O95197|RTN3_HUMAN	12	10	9	15	12	11	5	11	11	10	11	7
sp|O95202|LETM1_HUMAN	46	49	67	64	83	67	7	10	11	13	10	19
sp|O95210|STBD1_HUMAN	1	0	0	1	2	1	0	0	0	0	1	0
sp|O95218|ZRAB2_HUMAN	0	0	0	0	0	0	0	1	1	0	1	0
sp|O95219|SNX4_HUMAN	0	0	0	0	0	0	3	1	1	1	0	2
sp|O95232|LC7L3_HUMAN	1	1	0	0	0	0	4	4	4	4	6	3
sp|O95235|KI20A_HUMAN	1	0	0	0	0	1	6	6	4	0	4	3
sp|O95239|KIF4A_HUMAN;sp|Q2VIQ3|KIF4B_HUMAN	1	0	19	0	0	12	12	0	22	0	0	11
sp|O95248|MTMR5_HUMAN	0	0	0	0	0	1	3	0	1	3	0	0
sp|O95249|GOSR1_HUMAN	11	13	14	11	12	11	3	7	4	3	2	1
sp|O95251|KAT7_HUMAN	0	0	0	0	0	0	3	1	1	3	2	3
sp|O95258|UCP5_HUMAN	0	0	0	1	1	0	0	0	0	0	0	0
sp|O95273|CCDB1_HUMAN	0	0	0	0	0	0	0	0	0	0	0	0
sp|O95292|VAPB_HUMAN	17	15	11	14	14	12	9	12	10	10	9	10
sp|O95295|SNAPN_HUMAN	0	1	0	1	2	2	4	3	3	4	5	4
sp|O95297|MPZL1_HUMAN	4	7	9	6	6	10	1	3	6	1	4	4
sp|O95298|NDUC2_HUMAN;sp|E9PQ53|NDUCR_HUMAN	4	6	5	6	5	4	0	2	2	0	0	0
sp|O95299|NDUAA_HUMAN	16	18	26	4	5	4	2	4	7	0	0	0
sp|O95302|FKBP9_HUMAN;sp|Q75LS8|FKB9L_HUMAN	3	0	0	5	0	0	8	0	0	3	0	0
sp|O95336|6PGL_HUMAN	0	0	0	1	0	1	14	6	6	10	11	7
sp|O95340|PAPS2_HUMAN	0	5	3	0	1	0	5	10	15	7	8	12
sp|O95347|SMC2_HUMAN	18	22	24	29	31	32	31	45	40	36	48	37
sp|O95361|TRI16_HUMAN;sp|Q309B1|TR16L_HUMAN	0	0	0	0	0	0	10	13	21	5	7	8
sp|O95363|SYFM_HUMAN	8	9	9	2	1	2	0	0	0	0	0	0
sp|O95365|ZBT7A_HUMAN	0	0	0	0	0	0	0	0	0	1	0	0
sp|O95372|LYPA2_HUMAN	0	1	0	0	1	1	3	1	2	6	7	7
sp|O95373|IPO7_HUMAN	10	9	11	11	10	12	54	40	61	30	30	48
sp|O95376|ARI2_HUMAN	0	0	1	0	0	0	1	1	2	2	1	2
sp|O95379|TFIP8_HUMAN	0	0	0	0	0	0	1	1	1	1	3	2
sp|O95391|SLU7_HUMAN	0	0	0	0	0	0	0	0	0	0	0	0
sp|O95394|AGM1_HUMAN	0	0	0	0	0	0	1	3	3	3	3	5
sp|O95399|UTS2_HUMAN	0	0	0	0	0	0	1	0	0	0	0	0
sp|O95400|CD2B2_HUMAN	0	1	1	0	2	0	5	3	4	0	2	1
sp|O95406|CNIH1_HUMAN	2	2	3	1	5	3	0	3	2	0	0	1
sp|O95425|SVIL_HUMAN	13	6	15	5	3	7	4	2	2	1	0	1
sp|O95427|PIGN_HUMAN	3	0	0	0	0	0	0	0	0	0	0	0
sp|O95433|AHSA1_HUMAN	1	6	1	3	3	0	10	12	11	3	11	2
sp|O95453|PARN_HUMAN	0	0	0	0	1	0	4	4	0	0	1	0
sp|O95456|PSMG1_HUMAN	2	2	1	3	1	1	6	5	11	7	6	5
sp|O95466|FMNL1_HUMAN	0	0	0	2	2	0	1	0	0	3	4	5
sp|O95470|SGPL1_HUMAN	18	24	23	29	36	31	4	5	4	7	10	6
sp|O95478|NSA2_HUMAN	0	0	0	0	0	0	5	3	5	2	2	3
sp|O95486|SC24A_HUMAN	0	1	2	2	0	2	12	7	10	5	4	5
sp|O95487|SC24B_HUMAN	3	2	2	4	5	6	3	6	6	3	6	3
sp|O95562|SFT2B_HUMAN	3	3	2	3	3	2	1	2	1	0	0	0
sp|O95563|MPC2_HUMAN	13	16	14	8	12	12	4	5	4	0	1	2
sp|O95571|ETHE1_HUMAN	20	15	16	24	22	21	8	11	7	13	12	11
sp|O95573|ACSL3_HUMAN	44	33	42	40	45	66	9	14	14	11	19	18
sp|O95602|RPA1_HUMAN	0	9	5	1	2	7	7	18	12	0	9	2
sp|O95619|YETS4_HUMAN	0	0	0	0	0	0	1	5	2	1	1	0
sp|O95639|CPSF4_HUMAN	0	0	0	0	0	0	2	0	0	1	0	0
sp|O95674|CDS2_HUMAN	2	2	2	3	1	3	0	0	0	0	0	0
sp|O95714|HERC2_HUMAN	3	0	0	1	0	0	4	0	0	1	0	0
sp|O95716|RAB3D_HUMAN	2	0	1	3	3	1	0	1	1	1	1	1
sp|O95721|SNP29_HUMAN	2	2	3	2	1	3	2	0	3	2	1	1
sp|O95747|OXSR1_HUMAN	3	5	6	8	5	6	9	8	12	9	14	13
sp|O95751|LDOC1_HUMAN	0	0	0	0	0	0	2	1	1	0	0	0
sp|O95757|HS74L_HUMAN	0	0	1	1	0	1	4	9	15	2	9	11
sp|O95777|LSM8_HUMAN	0	1	1	0	1	2	2	2	4	3	3	2
sp|O95782|AP2A1_HUMAN	26	31	22	28	24	34	19	25	23	12	24	20
sp|O95786|DDX58_HUMAN	0	0	0	0	0	0	0	0	0	2	0	0
sp|O95793|STAU1_HUMAN	0	0	0	1	0	0	0	0	0	0	0	0
sp|O95801|TTC4_HUMAN	0	0	0	0	0	0	0	0	0	0	0	0
sp|O95807|TM50A_HUMAN	1	0	0	4	0	0	1	0	0	0	0	0
sp|O95816|BAG2_HUMAN	17	16	16	18	15	16	13	17	22	16	16	15
sp|O95817|BAG3_HUMAN	1	0	2	0	0	1	2	3	6	2	4	4
sp|O95819|M4K4_HUMAN;sp|Q8N4C8|MINK1_HUMAN;sp|Q9UKE5|TNIK_HUMAN	0	3	0	0	3	0	0	8	0	0	3	0
sp|O95822|DCMC_HUMAN	3	4	2	0	0	0	0	0	0	0	0	0
sp|O95831|AIFM1_HUMAN	76	86	112	87	91	94	13	15	19	13	19	19
sp|O95832|CLD1_HUMAN	3	6	4	6	8	4	3	3	3	3	3	3
sp|O95833|CLIC3_HUMAN	0	0	0	0	0	0	0	8	7	5	10	9
sp|O95834|EMAL2_HUMAN	0	0	0	0	0	0	0	0	0	0	0	0
sp|O95861|BPNT1_HUMAN	1	0	2	1	1	5	8	10	11	11	13	12
sp|O95864|FADS2_HUMAN	6	5	7	0	0	0	0	0	2	0	0	0
sp|O95865|DDAH2_HUMAN	0	0	0	0	0	0	1	0	2	4	3	4
sp|O95870|ABHGA_HUMAN	9	5	4	5	4	5	0	0	0	0	0	0
sp|O95881|TXD12_HUMAN	2	1	0	1	4	2	1	3	4	0	5	1
sp|O95900|TRUB2_HUMAN	7	6	6	4	4	8	0	1	3	0	0	0
sp|O95926|SYF2_HUMAN	0	0	0	0	0	0	1	0	1	1	0	0
sp|O95983|MBD3_HUMAN	0	1	0	0	0	0	3	3	2	3	2	2
sp|O95989|NUDT3_HUMAN	0	0	0	0	0	0	1	2	2	3	2	1
sp|O96000|NDUBA_HUMAN	20	22	21	18	24	18	6	8	10	8	8	5
sp|O96005|CLPT1_HUMAN	31	23	29	20	23	36	2	5	4	3	7	6
sp|O96007|MOC2B_HUMAN	0	0	0	0	0	0	1	1	1	3	3	1
sp|O96008|TOM40_HUMAN	67	92	98	88	101	94	8	14	19	8	18	13
sp|O96011|PX11B_HUMAN	5	7	7	6	6	4	1	3	2	1	1	1
sp|O96019|ACL6A_HUMAN;sp|O94805|ACL6B_HUMAN	5	0	0	4	0	0	7	0	0	10	0	0
sp|P00156|CYB_HUMAN	4	5	3	0	0	0	1	1	1	0	0	0
sp|P00167|CYB5_HUMAN	6	5	7	8	5	7	2	5	6	3	4	6
sp|P00338|LDHA_HUMAN	35	0	0	21	0	0	107	0	0	80	0	0
sp|P00367|DHE3_HUMAN;sp|P49448|DHE4_HUMAN	84	127	134	82	125	120	24	23	26	23	21	24
sp|P00374|DYR_HUMAN;sp|Q86XF0|DYR2_HUMAN	0	0	0	0	1	0	8	6	4	10	10	7
sp|P00387|NB5R3_HUMAN	84	75	116	71	78	102	25	27	48	30	30	32
sp|P00390|GSHR_HUMAN	7	2	4	7	11	7	11	4	6	7	9	9
sp|P00395|COX1_HUMAN	8	8	8	0	0	0	0	0	0	0	0	0
sp|P00403|COX2_HUMAN	24	27	22	0	0	0	8	8	7	0	0	0
sp|P00414|COX3_HUMAN	4	11	8	0	0	0	0	0	0	0	0	0
sp|P00439|PH4H_HUMAN	0	0	0	0	0	0	0	0	0	1	1	0
sp|P00441|SODC_HUMAN	3	3	2	3	5	3	8	6	7	7	8	9
sp|P00491|PNPH_HUMAN	1	0	2	2	0	1	24	20	34	19	17	15
sp|P00492|HPRT_HUMAN	2	1	0	5	3	3	14	16	20	16	18	14
sp|P00505|AATM_HUMAN	66	61	72	62	74	69	16	26	29	18	23	21
sp|P00533|EGFR_HUMAN;sp|Q15303|ERBB4_HUMAN	58	0	110	48	0	50	30	0	51	18	0	25
sp|P00558|PGK1_HUMAN	15	5	7	14	15	16	49	41	49	42	47	51
sp|P00568|KAD1_HUMAN;sp|Q9Y6K8|KAD5_HUMAN	1	0	0	1	1	1	13	10	8	12	12	13
sp|P00846|ATP6_HUMAN	6	6	6	0	0	0	1	3	3	0	0	0
sp|P00918|CAH2_HUMAN	0	0	0	0	0	0	0	0	0	5	6	4
sp|P00966|ASSY_HUMAN	0	0	0	0	0	0	0	0	0	15	10	8
sp|P01024|CO3_HUMAN;CON__Q2UVX4	32	0	13	3	0	6	5	0	5	0	0	0
sp|P01033|TIMP1_HUMAN	0	0	1	1	0	1	0	0	0	1	0	1
sp|P01111|RASN_HUMAN	4	7	5	12	11	13	5	6	10	8	15	8
sp|P01112|RASH_HUMAN	0	0	0	1	0	0	0	0	0	1	1	0
sp|P01116|RASK_HUMAN	3	3	1	3	3	3	1	1	2	3	2	2
sp|P01130|LDLR_HUMAN	8	16	18	3	8	7	0	6	13	0	1	0
sp|P01241|SOMA_HUMAN;sp|P01242|SOM2_HUMAN;sp|P0DML3|CSH2_HUMAN;sp|P0DML2|CSH1_HUMAN	3	4	0	3	2	0	2	15	0	5	2	0
sp|P01833|PIGR_HUMAN	0	0	0	0	0	1	0	0	0	0	0	1
sp|P01891|1A68_HUMAN;sp|P16190|1A33_HUMAN;sp|P30459|1A74_HUMAN;sp|P16189|1A31_HUMAN;sp|P30512|1A29_HUMAN;sp|P10314|1A32_HUMAN;sp|P30511|HLAF_HUMAN	51	48	59	35	30	36	28	27	36	15	18	16
sp|P02452|CO1A1_HUMAN;CON__Q862S4;sp|P02458|CO2A1_HUMAN	70	0	136	0	0	0	8	0	36	0	0	0
sp|P02461|CO3A1_HUMAN	16	0	0	1	0	0	0	0	0	0	0	0
sp|P02462|CO4A1_HUMAN;sp|P29400|CO4A5_HUMAN	6	12	0	4	9	0	0	4	0	1	3	0
sp|P02511|CRYAB_HUMAN	0	0	0	0	0	0	0	0	0	0	0	0
sp|P02533|K1C14_HUMAN;CON__P02533;CON__A2A4G1;CON__Q61782;sp|P35900|K1C20_HUMAN;CON__P35900;CON__Q9D312	0	0	0	0	0	0	16	0	0	6	0	0
sp|P02538|K2C6A_HUMAN;CON__P02538;sp|P48668|K2C6C_HUMAN;CON__P48668;CON__P04259	0	13	0	3	0	0	22	12	0	7	13	0
sp|P02545|LMNA_HUMAN	64	45	73	45	54	73	117	85	110	119	99	121
sp|P02751|FINC_HUMAN	34	109	84	31	66	47	2	38	50	4	40	24
sp|P02768|ALBU_HUMAN;CON__P02768-1	0	0	0	0	0	0	0	0	1	1	0	0
sp|P02786|TFR1_HUMAN;sp|Q9UP52|TFR2_HUMAN	128	217	203	136	183	180	93	147	155	90	95	107
sp|P02792|FRIL_HUMAN	3	0	2	1	0	0	4	8	7	0	10	4
sp|P02794|FRIH_HUMAN	14	11	13	6	15	5	18	25	25	10	23	13
sp|P02808|STAT_HUMAN	0	0	0	0	0	5	0	0	1	0	0	0
sp|P02814|SMR3B_HUMAN	0	0	0	0	0	5	0	0	0	0	0	2
sp|P03886|NU1M_HUMAN	6	9	8	0	0	0	0	1	0	0	0	0
sp|P03897|NU3M_HUMAN	1	2	2	0	0	0	0	1	1	0	0	0
sp|P03905|NU4M_HUMAN	5	18	10	0	0	0	0	1	1	0	0	0
sp|P03915|NU5M_HUMAN	10	13	9	0	0	0	0	0	0	0	0	0
sp|P03923|NU6M_HUMAN	4	3	4	0	0	0	1	1	0	0	0	0
sp|P03928|ATP8_HUMAN	12	17	16	0	0	0	1	2	1	0	0	0
sp|P04040|CATA_HUMAN	35	20	28	14	18	20	13	14	17	10	11	10
sp|P04062|GLCM_HUMAN	3	4	4	4	9	9	1	3	1	4	2	5
sp|P04075|ALDOA_HUMAN;sp|P05062|ALDOB_HUMAN	119	114	131	128	133	115	86	81	115	61	68	67
sp|P04080|CYTB_HUMAN	3	1	2	3	3	3	7	6	6	6	6	7
sp|P04083|ANXA1_HUMAN	13	17	32	43	31	44	37	41	66	59	52	59
sp|P04114|APOB_HUMAN	1	2	4	0	2	1	1	7	8	2	5	3
sp|P04150|GCR_HUMAN	0	0	0	0	0	0	2	0	0	2	0	0
sp|P04156|PRIO_HUMAN	6	3	7	7	7	8	4	4	4	7	6	3
sp|P04179|SODM_HUMAN	24	18	25	24	24	25	8	7	10	8	12	10
sp|P04181|OAT_HUMAN	39	37	38	32	24	26	10	9	15	11	10	10
sp|P04183|KITH_HUMAN	0	1	0	3	2	4	3	6	4	6	9	11
sp|P04216|THY1_HUMAN	7	12	15	0	0	0	2	7	9	0	0	0
sp|P04264|K2C1_HUMAN;CON__P04264	111	235	192	107	219	144	185	192	204	135	298	285
sp|P04350|TBB4A_HUMAN	0	0	0	1	1	0	1	3	1	0	1	2
sp|P04406|G3P_HUMAN;sp|O14556|G3PT_HUMAN	101	90	145	145	181	190	136	180	266	116	199	182
sp|P04626|ERBB2_HUMAN	1	0	1	0	0	1	1	0	0	0	0	0
sp|P04632|CPNS1_HUMAN;sp|Q96L46|CPNS2_HUMAN	2	1	2	5	6	7	13	16	16	17	17	19
sp|P04792|HSPB1_HUMAN	22	14	16	18	16	20	61	50	68	54	45	40
sp|P04818|TYSY_HUMAN	0	0	0	1	0	0	10	7	9	8	7	4
sp|P04843|RPN1_HUMAN	135	170	181	116	159	153	50	97	99	65	61	86
sp|P04844|RPN2_HUMAN	158	178	210	131	158	159	55	52	80	37	49	58
sp|P04899|GNAI2_HUMAN;sp|P11488|GNAT1_HUMAN;sp|P09471|GNAO_HUMAN;sp|P19087|GNAT2_HUMAN;sp|A8MTJ3|GNAT3_HUMAN	30	0	0	34	0	0	21	0	0	18	0	0
sp|P04920|B3A2_HUMAN;sp|P48751|B3A3_HUMAN	5	0	0	0	0	0	0	0	0	0	0	0
sp|P05023|AT1A1_HUMAN;sp|P13637|AT1A3_HUMAN;sp|P50993|AT1A2_HUMAN;sp|Q13733|AT1A4_HUMAN;sp|P20648|ATP4A_HUMAN;sp|P54707|AT12A_HUMAN	142	0	178	141	0	188	47	0	65	41	0	59
sp|P05026|AT1B1_HUMAN	9	15	13	20	19	16	4	9	5	8	7	6
sp|P05060|SCG1_HUMAN	0	0	0	1	0	0	0	0	0	0	0	0
sp|P05067|A4_HUMAN	18	15	30	15	14	18	4	10	15	6	8	1
sp|P05091|ALDH2_HUMAN;sp|P00352|AL1A1_HUMAN	35	0	18	31	0	23	6	0	5	11	0	4
sp|P05106|ITB3_HUMAN	1	3	3	3	4	3	0	0	1	0	0	0
sp|P05141|ADT2_HUMAN;sp|Q9H0C2|ADT4_HUMAN	125	0	99	101	0	85	44	0	27	47	0	26
sp|P05161|ISG15_HUMAN	0	0	0	2	3	3	6	2	3	9	9	7
sp|P05165|PCCA_HUMAN	12	4	10	3	3	1	0	0	0	0	0	0
sp|P05166|PCCB_HUMAN	14	14	15	8	8	5	2	0	0	0	0	0
sp|P05186|PPBT_HUMAN	6	0	0	0	0	0	4	0	0	0	0	0
sp|P05187|PPB1_HUMAN;sp|P10696|PPBN_HUMAN;sp|P09923|PPBI_HUMAN	0	0	1	7	0	10	0	0	0	3	0	4
sp|P05198|IF2A_HUMAN	8	14	19	20	23	25	20	28	41	20	31	39
sp|P05204|HMGN2_HUMAN;sp|Q15651|HMGN3_HUMAN	1	0	1	1	0	1	1	0	1	1	0	0
sp|P05362|ICAM1_HUMAN	6	7	8	4	5	6	2	6	9	1	1	1
sp|P05386|RLA1_HUMAN	6	13	11	6	12	6	7	8	10	5	6	3
sp|P05387|RLA2_HUMAN	11	14	16	10	13	12	13	12	15	8	15	10
sp|P05388|RLA0_HUMAN;sp|Q8NHW5|RLA0L_HUMAN	32	51	72	28	37	39	27	29	44	19	25	24
sp|P05455|LA_HUMAN	0	0	2	3	7	10	14	14	22	18	23	13
sp|P05556|ITB1_HUMAN	50	66	96	60	80	83	28	36	44	28	44	49
sp|P05783|K1C18_HUMAN;CON__H-INV:HIT000015463;CON__Q92764;sp|Q92764|KRT35_HUMAN;CON__Q497I4	32	0	0	71	0	0	56	0	0	116	0	0
sp|P05787|K2C8_HUMAN;CON__P05787;CON__H-INV:HIT000292931;CON__Q9H552;CON__H-INV:HIT000016045;CON__REFSEQ:XP_092267	53	0	76	96	0	114	95	0	94	155	0	189
sp|P06132|DCUP_HUMAN	0	0	0	0	0	0	2	5	5	4	7	6
sp|P06396|GELS_HUMAN;CON__Q3SX14	0	0	0	3	0	0	1	0	0	15	0	0
sp|P06454|PTMA_HUMAN	0	1	1	1	1	1	5	2	4	2	7	11
sp|P06493|CDK1_HUMAN;sp|Q96Q40|CDK15_HUMAN;sp|O94921|CDK14_HUMAN;sp|Q07002|CDK18_HUMAN;sp|Q00536|CDK16_HUMAN;sp|Q00537|CDK17_HUMAN	8	7	7	8	8	10	24	15	22	22	18	25
sp|P06576|ATPB_HUMAN	305	464	487	286	420	400	67	87	92	54	78	68
sp|P06703|S10A6_HUMAN	1	0	1	1	1	3	4	9	6	5	12	10
sp|P06730|IF4E_HUMAN	2	5	3	3	2	2	6	7	5	3	5	4
sp|P06733|ENOA_HUMAN	39	9	0	55	37	0	161	116	0	144	194	0
sp|P06737|PYGL_HUMAN	0	1	1	0	2	1	14	11	20	21	32	24
sp|P06744|G6PI_HUMAN;sp|Q8N196|SIX5_HUMAN	6	2	5	7	8	9	33	33	45	27	34	36
sp|P06748|NPM_HUMAN	28	35	35	33	36	46	74	109	129	75	92	99
sp|P06753|TPM3_HUMAN	4	3	6	4	3	6	10	13	17	17	12	21
sp|P06756|ITAV_HUMAN	40	69	68	57	81	77	19	36	40	24	45	50
sp|P06865|HEXA_HUMAN	4	0	1	1	2	3	9	5	8	6	7	5
sp|P07093|GDN_HUMAN	2	3	3	4	3	3	0	1	3	4	2	2
sp|P07099|HYEP_HUMAN	67	44	46	20	31	27	19	9	16	6	12	8
sp|P07108|ACBP_HUMAN	0	0	0	0	0	0	2	4	4	2	2	0
sp|P07195|LDHB_HUMAN;sp|Q6ZMR3|LDH6A_HUMAN;sp|P07864|LDHC_HUMAN	13	0	0	14	0	0	64	0	0	53	0	0
sp|P07199|CENPB_HUMAN	0	0	0	0	0	0	1	0	2	0	0	2
sp|P07203|GPX1_HUMAN	5	12	10	6	8	8	0	9	4	6	8	9
sp|P07204|TRBM_HUMAN	0	0	0	1	1	1	0	0	0	1	1	1
sp|P07205|PGK2_HUMAN	0	0	0	0	0	0	1	0	0	1	0	0
sp|P07237|PDIA1_HUMAN	51	52	68	36	50	46	42	72	70	42	46	50
sp|P07305|H10_HUMAN	0	0	1	0	0	0	1	1	1	1	1	1
sp|P07311|ACYP1_HUMAN	0	0	0	0	0	0	3	1	1	1	1	1
sp|P07339|CATD_HUMAN	19	7	9	15	11	11	23	10	17	25	26	21
sp|P07355|ANXA2_HUMAN;sp|A6NMY6|AXA2L_HUMAN	93	132	168	118	146	162	103	122	156	101	102	123
sp|P07384|CAN1_HUMAN	1	0	2	1	2	2	7	4	13	10	12	13
sp|P07437|TBB5_HUMAN;sp|A6NNZ2|TBB8L_HUMAN	15	0	0	37	0	0	44	0	0	40	0	0
sp|P07602|SAP_HUMAN	10	10	13	13	23	16	5	12	11	8	14	15
sp|P07686|HEXB_HUMAN	4	2	1	2	3	6	12	12	6	10	9	7
sp|P07711|CATL1_HUMAN	0	0	0	0	1	1	0	0	4	0	3	2
sp|P07737|PROF1_HUMAN;CON__P02584	8	10	12	9	18	13	50	52	64	33	42	37
sp|P07738|PMGE_HUMAN	1	0	0	2	0	0	0	0	0	0	0	0
sp|P07741|APT_HUMAN	0	0	0	0	0	0	10	12	11	9	15	8
sp|P07814|SYEP_HUMAN	29	45	50	59	54	62	84	113	126	85	113	113
sp|P07858|CATB_HUMAN	0	0	0	0	0	2	1	0	0	6	3	7
sp|P07900|HS90A_HUMAN;sp|Q58FG0|HS905_HUMAN;sp|Q14568|HS902_HUMAN	19	0	39	20	0	49	81	0	265	51	0	188
sp|P07910|HNRPC_HUMAN;sp|B2RXH8|HNRC2_HUMAN;sp|Q86SE5|RALYL_HUMAN	6	0	17	5	0	17	29	0	65	26	0	36
sp|P07919|QCR6_HUMAN;sp|A0A096LP55|QCR6L_HUMAN	9	11	8	7	14	10	3	3	4	3	6	5
sp|P07942|LAMB1_HUMAN	54	81	74	44	48	42	29	55	54	18	26	16
sp|P07947|YES_HUMAN;sp|P06239|LCK_HUMAN	1	0	0	1	0	0	0	0	0	0	0	0
sp|P07948|LYN_HUMAN;sp|P08631|HCK_HUMAN	2	0	0	2	1	0	1	0	0	0	0	0
sp|P07951|TPM2_HUMAN	0	0	0	0	0	0	0	1	1	1	0	3
sp|P07954|FUMH_HUMAN	54	32	47	34	29	27	17	14	22	14	15	12
sp|P07996|TSP1_HUMAN;CON__Q28194;sp|P35442|TSP2_HUMAN	15	0	0	19	0	0	8	0	0	8	0	0
sp|P08069|IGF1R_HUMAN	2	0	0	3	0	0	0	0	0	0	0	0
sp|P08133|ANXA6_HUMAN	28	17	32	28	22	28	36	29	40	25	30	21
sp|P08134|RHOC_HUMAN	0	0	0	0	1	1	1	1	2	1	2	1
sp|P08174|DAF_HUMAN	10	11	16	13	10	13	3	8	11	10	6	6
sp|P08183|MDR1_HUMAN;sp|P21439|MDR3_HUMAN	0	0	0	0	3	5	0	0	0	0	0	2
sp|P08195|4F2_HUMAN	120	225	264	171	244	246	69	112	135	80	109	109
sp|P08236|BGLR_HUMAN	0	0	0	0	0	0	0	0	0	0	0	0
sp|P08237|PFKAM_HUMAN	1	1	1	3	1	2	18	11	14	15	13	8
sp|P08238|HS90B_HUMAN;sp|Q58FF7|H90B3_HUMAN;sp|Q58FG1|HS904_HUMAN	56	0	33	62	0	31	167	0	144	126	0	85
sp|P08240|SRPRA_HUMAN	35	38	49	23	17	27	4	4	13	3	4	6
sp|P08243|ASNS_HUMAN	0	0	0	2	1	2	8	12	18	33	31	42
sp|P08559|ODPA_HUMAN;sp|P29803|ODPAT_HUMAN	51	49	65	42	51	52	13	14	24	10	12	11
sp|P08572|CO4A2_HUMAN	11	13	14	9	14	7	1	3	3	2	3	2
sp|P08574|CY1_HUMAN	26	39	29	36	50	47	10	13	11	10	14	13
sp|P08579|RU2B_HUMAN	0	0	0	1	1	2	7	10	10	6	12	4
sp|P08581|MET_HUMAN;sp|Q9H3Y6|SRMS_HUMAN;sp|P42685|FRK_HUMAN;sp|Q04912|RON_HUMAN	8	41	0	19	33	0	2	17	0	7	14	0
sp|P08582|TRFM_HUMAN	0	0	0	0	0	0	1	0	1	0	0	1
sp|P08603|CFAH_HUMAN;sp|Q03591|FHR1_HUMAN	2	0	0	0	0	0	0	0	0	0	0	0
sp|P08621|RU17_HUMAN	0	0	0	0	0	0	7	10	13	7	13	8
sp|P08648|ITA5_HUMAN	28	45	44	23	29	21	13	36	28	12	15	15
sp|P08651|NFIC_HUMAN	1	1	0	1	1	0	3	0	1	1	0	0
sp|P08670|VIME_HUMAN;sp|P41219|PERI_HUMAN;sp|P17661|DESM_HUMAN;sp|P14136|GFAP_HUMAN;sp|P07196|NFL_HUMAN;sp|P07197|NFM_HUMAN;sp|P12036|NFH_HUMAN	71	0	0	79	0	0	163	0	0	207	0	0
sp|P08708|RS17_HUMAN	14	15	11	10	11	12	14	16	15	11	14	9
sp|P08727|K1C19_HUMAN;CON__P08727	0	0	0	1	0	1	0	0	1	14	8	8
sp|P08729|K2C7_HUMAN;CON__Q3KNV1	2	5	3	8	3	5	6	7	7	12	10	8
sp|P08754|GNAI3_HUMAN	10	0	17	10	0	17	6	0	8	8	0	9
sp|P08758|ANXA5_HUMAN	21	21	32	22	20	18	31	28	57	47	39	43
sp|P08779|K1C16_HUMAN;CON__P08779	0	0	0	0	0	0	9	0	0	6	0	0
sp|P08865|RSSA_HUMAN	18	14	17	18	15	18	36	41	49	36	40	47
sp|P08962|CD63_HUMAN	6	6	8	5	6	6	9	5	4	7	4	5
sp|P09001|RM03_HUMAN	15	17	22	2	4	4	2	2	2	0	0	0
sp|P09012|SNRPA_HUMAN	0	0	1	0	0	2	11	9	14	9	7	14
sp|P09038|FGF2_HUMAN	1	5	4	5	6	5	1	6	3	3	6	4
sp|P09104|ENOG_HUMAN	0	0	0	0	0	0	0	0	0	1	0	0
sp|P09110|THIK_HUMAN	19	13	15	14	13	10	4	5	4	3	4	2
sp|P09132|SRP19_HUMAN	1	2	2	0	3	2	2	3	3	2	3	2
sp|P09211|GSTP1_HUMAN	8	5	8	7	8	11	37	31	33	31	29	29
sp|P09234|RU1C_HUMAN	0	0	0	0	2	0	2	4	5	4	6	2
sp|P09382|LEG1_HUMAN	8	10	9	8	13	12	14	29	31	20	35	26
sp|P09417|DHPR_HUMAN	7	8	9	3	4	3	7	10	9	6	6	8
sp|P09429|HMGB1_HUMAN;sp|B2RPK0|HGB1A_HUMAN	6	4	12	5	5	15	17	15	16	18	17	13
sp|P09488|GSTM1_HUMAN	0	0	0	0	0	0	13	10	8	8	6	6
sp|P09493|TPM1_HUMAN	5	9	14	11	9	15	37	50	40	55	31	48
sp|P09496|CLCA_HUMAN	1	2	5	2	2	0	7	8	7	4	8	8
sp|P09497|CLCB_HUMAN	0	1	0	2	1	1	2	4	4	3	3	7
sp|P09525|ANXA4_HUMAN	2	0	4	10	9	8	14	5	9	18	15	15
sp|P09543|CN37_HUMAN	21	12	14	15	9	8	11	8	16	7	4	4
sp|P09601|HMOX1_HUMAN	8	11	13	6	7	8	2	5	7	1	0	1
sp|P09619|PGFRB_HUMAN	7	10	0	1	2	0	0	2	0	0	0	0
sp|P09622|DLDH_HUMAN	45	48	52	28	35	28	16	16	18	13	10	14
sp|P09651|ROA1_HUMAN;sp|Q32P51|RA1L2_HUMAN	29	41	52	36	34	60	71	90	100	75	66	83
sp|P09661|RU2A_HUMAN	0	5	2	6	6	3	11	11	10	13	10	8
sp|P09669|COX6C_HUMAN	11	11	10	3	7	2	0	2	2	0	2	2
sp|P09758|TACD2_HUMAN	2	8	11	5	3	5	1	4	3	1	2	1
sp|P09874|PARP1_HUMAN	45	54	69	55	65	85	55	53	74	52	63	80
sp|P09884|DPOLA_HUMAN	0	0	0	0	0	0	16	18	10	6	18	10
sp|P09960|LKHA4_HUMAN	0	0	0	0	0	1	13	19	19	18	27	26
sp|P09972|ALDOC_HUMAN	7	5	7	9	4	5	7	6	7	5	6	6
sp|P0C2W1|FBSP1_HUMAN	0	0	0	1	0	0	0	0	0	0	0	0
sp|P0C7P0|CISD3_HUMAN	2	2	2	1	1	1	0	0	0	0	0	0
sp|P0C841|FA66E_HUMAN	0	0	0	0	0	0	0	0	0	0	0	0
sp|P0CG08|GPHRB_HUMAN;sp|B7ZAQ6|GPHRA_HUMAN	4	5	5	4	5	5	0	0	1	0	2	0
sp|P0CG30|GSTT2_HUMAN;sp|P0CG29|GST2_HUMAN;sp|P30711|GSTT1_HUMAN	2	1	0	2	2	0	1	1	0	1	3	0
sp|P0CG38|POTEI_HUMAN;sp|P0CG39|POTEJ_HUMAN	0	0	0	0	0	0	0	0	0	1	0	0
sp|P0DMR1|HNRC4_HUMAN;sp|O60812|HNRC1_HUMAN;sp|B7ZW38|HNRC3_HUMAN	0	0	0	0	0	0	1	0	2	0	0	2
sp|P0DMV9|HS71B_HUMAN;sp|P0DMV8|HS71A_HUMAN	37	32	51	34	42	47	55	66	79	45	59	62
sp|P0DP25|CALM3_HUMAN;sp|P0DP24|CALM2_HUMAN;sp|P0DP23|CALM1_HUMAN;sp|P27482|CALL3_HUMAN;sp|P02585|TNNC2_HUMAN	7	8	0	4	8	0	10	18	0	13	18	0
sp|P0DPB6|RPAC2_HUMAN;sp|P0DPB5|RPC22_HUMAN	1	0	0	0	0	0	6	0	0	2	0	0
sp|P10109|ADX_HUMAN	2	2	1	3	4	2	0	1	1	1	1	1
sp|P10114|RAP2A_HUMAN	0	1	3	1	2	3	0	1	0	0	0	0
sp|P10155|RO60_HUMAN	0	0	0	0	1	1	8	13	15	5	11	11
sp|P10253|LYAG_HUMAN	0	0	0	0	0	0	0	0	0	0	0	0
sp|P10301|RRAS_HUMAN	4	10	6	9	9	9	4	11	6	7	7	6
sp|P10316|1A69_HUMAN;sp|P01892|1A02_HUMAN	3	3	4	2	2	1	2	1	3	1	1	1
sp|P10321|1C07_HUMAN	3	6	4	2	3	3	2	3	3	2	4	3
sp|P10412|H14_HUMAN	1	0	0	0	0	0	1	0	0	1	0	0
sp|P10415|BCL2_HUMAN	1	0	0	1	1	0	0	0	0	0	0	0
sp|P10515|ODP2_HUMAN	35	29	38	16	18	17	10	5	11	2	3	5
sp|P10586|PTPRF_HUMAN;sp|P23468|PTPRD_HUMAN;sp|Q13332|PTPRS_HUMAN	28	0	0	74	0	0	8	0	0	33	0	0
sp|P10599|THIO_HUMAN	4	6	7	5	8	7	7	11	13	8	17	15
sp|P10606|COX5B_HUMAN	7	10	8	0	4	4	2	3	4	0	3	3
sp|P10619|PPGB_HUMAN	2	3	3	2	2	3	4	6	4	3	4	2
sp|P10620|MGST1_HUMAN	14	22	28	27	46	43	5	9	9	10	14	11
sp|P10644|KAP0_HUMAN;sp|P31321|KAP1_HUMAN	1	0	0	1	0	0	10	0	0	5	0	0
sp|P10768|ESTD_HUMAN	1	0	0	0	0	0	11	6	11	11	9	10
sp|P10809|CH60_HUMAN	504	624	763	473	732	704	129	208	234	120	228	276
sp|P10909|CLUS_HUMAN	4	5	7	7	5	8	1	4	5	0	3	5
sp|P11021|BIP_HUMAN	112	121	175	141	137	156	72	88	118	80	77	77
sp|P11047|LAMC1_HUMAN;sp|Q9Y6N6|LAMC3_HUMAN	41	70	0	40	51	0	22	53	0	17	23	0
sp|P11117|PPAL_HUMAN	2	3	6	2	6	6	1	4	4	4	7	5
sp|P11142|HSP7C_HUMAN;sp|P54652|HSP72_HUMAN	74	0	120	70	0	99	97	0	196	70	0	109
sp|P11166|GTR1_HUMAN	24	51	55	41	49	44	11	24	26	15	14	12
sp|P11169|GTR3_HUMAN;sp|Q8TDB8|GTR14_HUMAN	0	0	0	2	2	0	0	0	0	0	0	0
sp|P11171|41_HUMAN	1	0	0	3	2	1	0	0	1	0	0	0
sp|P11172|UMPS_HUMAN	5	4	5	3	0	0	12	8	9	11	7	6
sp|P11177|ODPB_HUMAN	70	68	83	68	69	77	24	24	25	19	20	20
sp|P11182|ODB2_HUMAN	16	15	16	18	10	11	0	1	2	0	2	0
sp|P11216|PYGB_HUMAN	0	0	0	0	0	0	6	3	5	8	9	7
sp|P11217|PYGM_HUMAN	1	2	2	1	2	2	1	2	2	2	2	1
sp|P11233|RALA_HUMAN	11	4	5	13	5	3	9	4	3	9	4	4
sp|P11234|RALB_HUMAN	0	12	11	2	15	11	0	11	8	0	7	5
sp|P11277|SPTB1_HUMAN	0	0	0	1	0	0	0	0	1	0	0	0
sp|P11279|LAMP1_HUMAN	14	7	11	16	13	14	12	6	10	15	7	10
sp|P11310|ACADM_HUMAN	23	15	15	20	20	25	4	4	3	5	4	6
sp|P11387|TOP1_HUMAN;sp|Q969P6|TOP1M_HUMAN	16	29	32	11	20	27	26	29	40	17	25	27
sp|P11388|TOP2A_HUMAN	3	11	8	13	15	15	56	69	71	44	60	67
sp|P11413|G6PD_HUMAN	10	3	4	7	7	5	34	32	48	24	39	29
sp|P11441|UBL4A_HUMAN	1	2	1	1	1	1	1	5	5	1	5	1
sp|P11498|PYC_HUMAN	79	35	53	38	45	51	21	4	15	3	12	16
sp|P11532|DMD_HUMAN	0	0	0	2	0	0	2	0	0	0	0	0
sp|P11586|C1TC_HUMAN	49	41	70	70	61	71	58	32	46	43	35	42
sp|P11717|MPRI_HUMAN	71	130	120	77	84	75	42	79	86	32	55	34
sp|P11766|ADHX_HUMAN	0	0	0	0	1	1	10	4	9	11	10	11
sp|P11802|CDK4_HUMAN	0	0	0	0	0	0	15	7	12	6	2	3
sp|P11908|PRPS2_HUMAN	0	0	0	0	0	0	3	5	5	4	3	3
sp|P11940|PABP1_HUMAN;sp|Q9H361|PABP3_HUMAN;sp|Q4VXU2|PAP1L_HUMAN;sp|Q96DU9|PABP5_HUMAN;sp|Q5JQF8|PAP1M_HUMAN	32	43	0	36	29	0	51	42	0	40	37	0
sp|P12004|PCNA_HUMAN	5	0	1	7	2	4	22	16	19	24	17	25
sp|P12035|K2C3_HUMAN;CON__P12035;CON__Q01546	0	0	0	1	0	0	1	0	0	2	0	0
sp|P12081|SYHC_HUMAN	12	1	3	15	4	4	16	8	11	20	10	11
sp|P12109|CO6A1_HUMAN	14	0	4	0	0	0	3	0	1	0	0	0
sp|P12110|CO6A2_HUMAN	3	0	0	0	0	0	0	0	0	0	0	0
sp|P12235|ADT1_HUMAN	8	9	16	8	15	11	3	3	3	3	2	4
sp|P12236|ADT3_HUMAN	28	44	146	27	30	103	10	14	60	7	4	55
sp|P12268|IMDH2_HUMAN	10	2	2	3	4	5	32	26	36	26	22	22
sp|P12270|TPR_HUMAN	1	1	4	1	1	2	79	98	85	56	89	73
sp|P12277|KCRB_HUMAN	2	0	0	2	0	0	28	15	0	11	9	0
sp|P12429|ANXA3_HUMAN	4	9	17	15	11	22	20	22	21	40	28	35
sp|P12645|BMP3_HUMAN	0	0	0	0	0	0	0	0	0	0	0	0
sp|P12694|ODBA_HUMAN	12	7	9	7	5	4	3	0	1	0	0	0
sp|P12814|ACTN1_HUMAN;sp|P35609|ACTN2_HUMAN;sp|Q08043|ACTN3_HUMAN	32	24	0	49	35	0	83	86	0	69	97	0
sp|P12955|PEPD_HUMAN	0	0	0	0	0	0	6	4	6	4	3	4
sp|P12956|XRCC6_HUMAN	30	26	35	54	59	69	55	50	67	61	55	71
sp|P13010|XRCC5_HUMAN	25	31	27	51	54	44	44	47	65	74	68	83
sp|P13051|UNG_HUMAN	2	2	1	2	3	3	0	0	1	0	1	1
sp|P13073|COX41_HUMAN	21	22	23	19	20	24	8	10	10	5	9	10
sp|P13284|GILT_HUMAN	1	0	2	0	0	0	2	0	1	0	0	0
sp|P13473|LAMP2_HUMAN	11	8	15	12	13	16	11	10	7	15	14	13
sp|P13489|RINI_HUMAN	0	0	0	2	0	0	12	8	10	17	10	13
sp|P13639|EF2_HUMAN	46	64	70	17	34	23	126	117	205	73	81	69
sp|P13645|K1C10_HUMAN;CON__P13645;CON__P02535-1;sp|Q7Z3Y7|K1C28_HUMAN;CON__Q7Z3Y7;sp|Q7Z3Z0|K1C25_HUMAN;CON__Q7Z3Z0;sp|Q7Z3Y8|K1C27_HUMAN;CON__Q7Z3Y8;sp|Q2M2I5|K1C24_HUMAN;CON__Q2M2I5;sp|Q14525|KT33B_HUMAN;CON__Q14525;sp|Q15323|K1H1_HUMAN;CON__Q9UE12;CON__Q15323;CON__A2A5Y0;sp|Q14532|K1H2_HUMAN;CON__Q14532;sp|O76014|KRT37_HUMAN;CON__A2AB72;sp|O76013|KRT36_HUMAN;CON__O76013;sp|Q7Z3Y9|K1C26_HUMAN;C…	73	0	0	70	0	0	134	0	0	90	0	0
sp|P13646|K1C13_HUMAN;CON__ENSEMBL:ENSP00000377550;CON__P13646-1	0	0	0	0	0	0	0	0	0	0	0	0
sp|P13647|K2C5_HUMAN;CON__P13647	5	11	11	0	6	1	13	5	13	6	11	3
sp|P13667|PDIA4_HUMAN	31	16	26	19	16	27	33	39	48	28	25	27
sp|P13674|P4HA1_HUMAN	26	24	34	10	15	14	11	21	21	2	6	8
sp|P13693|TCTP_HUMAN;sp|Q56UQ5|TPT1L_HUMAN	1	0	0	0	1	0	11	22	19	10	11	11
sp|P13726|TF_HUMAN	0	6	9	6	7	10	0	1	4	0	2	1
sp|P13796|PLSL_HUMAN	0	0	0	0	0	0	0	0	0	0	0	0
sp|P13797|PLST_HUMAN;sp|Q14651|PLSI_HUMAN	16	0	0	13	0	0	40	0	0	44	0	0
sp|P13798|ACPH_HUMAN	0	0	0	0	0	0	11	7	13	13	10	13
sp|P13804|ETFA_HUMAN	33	25	38	24	28	33	16	14	20	13	9	18
sp|P13807|GYS1_HUMAN;sp|P54840|GYS2_HUMAN	0	0	0	0	0	0	4	3	6	4	10	5
sp|P13861|KAP2_HUMAN	5	0	0	3	0	0	12	0	0	10	0	0
sp|P13928|ANXA8_HUMAN	0	0	0	0	0	1	0	0	4	1	0	16
sp|P13929|ENOB_HUMAN	0	0	0	0	0	0	0	0	0	0	3	1
sp|P13984|T2FB_HUMAN	0	0	0	0	0	0	4	7	12	5	6	3
sp|P13987|CD59_HUMAN	10	13	10	12	13	8	8	11	10	10	9	8
sp|P13995|MTDC_HUMAN	14	15	16	31	37	36	3	6	6	6	11	8
sp|P14174|MIF_HUMAN	3	2	3	2	4	2	9	8	12	8	14	11
sp|P14209|CD99_HUMAN	2	0	2	2	1	1	1	0	1	1	0	0
sp|P14314|GLU2B_HUMAN	29	22	36	27	32	36	23	22	40	19	25	27
sp|P14324|FPPS_HUMAN	2	2	3	1	2	3	11	12	19	7	12	12
sp|P14384|CBPM_HUMAN	0	0	0	5	4	5	0	0	0	1	1	3
sp|P14406|CX7A2_HUMAN	3	5	4	2	2	2	2	2	2	0	2	0
sp|P14550|AK1A1_HUMAN	1	0	0	0	0	0	5	5	10	5	10	9
sp|P14618|KPYM_HUMAN;sp|P30613|KPYR_HUMAN	83	39	62	68	79	60	242	327	397	212	244	309
sp|P14625|ENPL_HUMAN;sp|Q58FF3|ENPLL_HUMAN	122	92	113	93	103	119	83	65	107	53	69	60
sp|P14635|CCNB1_HUMAN	3	5	4	7	7	7	4	8	8	11	8	8
sp|P14649|MYL6B_HUMAN	0	0	0	0	0	0	1	2	0	2	1	0
sp|P14735|IDE_HUMAN	5	2	4	0	0	1	23	11	15	4	1	1
sp|P14854|CX6B1_HUMAN	10	9	9	4	3	3	2	4	5	1	2	1
sp|P14866|HNRPL_HUMAN	8	21	25	10	17	21	33	42	51	37	31	29
sp|P14868|SYDC_HUMAN	6	14	13	17	11	16	24	21	22	27	30	28
sp|P14923|PLAK_HUMAN	32	71	77	63	97	71	18	38	44	25	31	36
sp|P14927|QCR7_HUMAN	15	12	17	2	4	2	4	7	7	0	1	0
sp|P15104|GLNA_HUMAN	0	0	0	0	0	0	0	0	3	2	0	0
sp|P15121|ALDR_HUMAN;sp|C9JRZ8|AK1BF_HUMAN	7	3	11	2	3	6	17	22	26	12	21	19
sp|P15144|AMPN_HUMAN	61	63	74	55	43	45	36	48	51	26	29	27
sp|P15151|PVR_HUMAN	3	5	12	8	9	11	3	4	8	2	6	6
sp|P15153|RAC2_HUMAN	0	0	0	1	1	0	0	1	0	2	1	0
sp|P15170|ERF3A_HUMAN	0	0	0	0	0	0	17	13	35	17	16	20
sp|P15260|INGR1_HUMAN	1	1	0	0	0	0	0	0	1	0	0	0
sp|P15291|B4GT1_HUMAN	10	15	13	11	18	17	6	7	5	5	8	8
sp|P15311|EZRI_HUMAN	24	21	32	37	36	44	24	27	39	34	37	43
sp|P15328|FOLR1_HUMAN	9	12	18	27	35	34	7	3	9	18	21	22
sp|P15374|UCHL3_HUMAN	0	0	0	0	0	0	6	13	11	6	6	9
sp|P15515|HIS1_HUMAN;sp|P15516|HIS3_HUMAN	0	0	0	0	0	0	0	0	0	0	0	0
sp|P15529|MCP_HUMAN	4	7	10	6	6	5	2	1	3	1	1	1
sp|P15531|NDKA_HUMAN	6	6	12	7	6	14	10	13	30	10	16	22
sp|P15559|NQO1_HUMAN	3	3	6	1	2	3	19	17	29	15	18	14
sp|P15586|GNS_HUMAN	3	4	2	3	0	1	4	6	7	1	1	3
sp|P15880|RS2_HUMAN	14	21	21	15	15	16	25	31	50	20	14	23
sp|P15924|DESP_HUMAN	0	0	0	0	0	0	0	0	35	18	13	6
sp|P15927|RFA2_HUMAN	1	1	0	1	0	1	5	3	5	5	5	6
sp|P15941|MUC1_HUMAN	2	0	0	0	0	2	0	0	0	0	0	1
sp|P15954|COX7C_HUMAN	2	0	0	0	0	0	0	0	0	0	0	0
sp|P16070|CD44_HUMAN	34	50	54	40	45	48	18	31	36	20	21	30
sp|P16083|NQO2_HUMAN	0	0	0	0	0	0	2	0	0	5	4	2
sp|P16144|ITB4_HUMAN	4	0	0	58	48	48	0	0	0	15	16	6
sp|P16152|CBR1_HUMAN	9	3	7	3	1	4	23	21	22	21	21	22
sp|P16219|ACADS_HUMAN	3	0	0	0	0	0	0	0	0	0	0	0
sp|P16220|CREB1_HUMAN	0	0	0	0	0	0	0	0	0	1	0	0
sp|P16260|GDC_HUMAN	0	0	0	3	0	2	0	0	0	0	0	0
sp|P16278|BGAL_HUMAN	2	1	2	1	1	1	2	1	2	1	5	6
sp|P16333|NCK1_HUMAN	0	0	0	0	0	0	1	0	0	1	0	0
sp|P16401|H15_HUMAN	5	6	8	5	7	8	13	7	10	6	6	12
sp|P16402|H13_HUMAN	1	1	0	1	1	0	1	1	0	1	0	0
sp|P16403|H12_HUMAN	11	2	2	11	2	2	18	3	5	13	4	2
sp|P16422|EPCAM_HUMAN	0	0	0	0	0	0	0	0	0	0	0	0
sp|P16435|NCPR_HUMAN	47	46	67	35	38	41	11	23	17	7	14	7
sp|P16615|AT2A2_HUMAN	192	0	0	117	0	0	52	0	0	29	0	0
sp|P16930|FAAA_HUMAN	0	0	0	0	0	0	2	2	5	2	1	2
sp|P16949|STMN1_HUMAN	2	0	0	1	2	1	7	5	7	11	13	10
sp|P16989|YBOX3_HUMAN;sp|Q9Y2T7|YBOX2_HUMAN	7	0	0	7	0	0	8	0	0	11	0	0
sp|P17066|HSP76_HUMAN;sp|P48741|HSP77_HUMAN	7	8	8	7	8	7	10	10	12	8	9	9
sp|P17096|HMGA1_HUMAN	1	3	5	8	6	8	8	6	4	10	8	6
sp|P17152|TMM11_HUMAN	10	12	11	9	12	8	2	5	2	2	4	3
sp|P17174|AATC_HUMAN	0	0	0	1	0	0	17	8	13	13	17	11
sp|P17252|KPCA_HUMAN;sp|P05771|KPCB_HUMAN;sp|P05129|KPCG_HUMAN	3	0	8	3	0	2	5	0	13	3	0	2
sp|P17275|JUNB_HUMAN	0	0	0	0	0	0	0	0	0	0	1	0
sp|P17301|ITA2_HUMAN	15	31	33	70	44	60	6	15	17	23	25	32
sp|P17302|CXA1_HUMAN	3	5	8	0	0	0	1	2	7	0	0	0
sp|P17342|ANPRC_HUMAN	0	1	1	1	7	6	0	0	0	0	2	2
sp|P17480|UBF1_HUMAN	2	6	9	0	6	6	4	12	12	2	6	5
sp|P17568|NDUB7_HUMAN	14	11	15	3	4	4	2	4	4	0	0	0
sp|P17612|KAPCA_HUMAN	2	4	2	1	3	3	10	8	9	1	4	3
sp|P17655|CAN2_HUMAN	0	1	1	2	1	4	21	25	31	28	22	28
sp|P17706|PTN2_HUMAN	5	3	3	3	2	2	0	0	0	0	0	0
sp|P17812|PYRG1_HUMAN	0	0	0	2	2	3	22	24	30	24	24	27
sp|P17813|EGLN_HUMAN	8	13	12	4	5	3	6	7	9	3	1	2
sp|P17844|DDX5_HUMAN	23	42	52	19	34	37	51	38	53	31	31	33
sp|P17858|PFKAL_HUMAN	0	0	0	0	2	0	2	1	1	9	7	7
sp|P17931|LEG3_HUMAN	7	1	4	4	2	7	11	8	8	10	18	9
sp|P17980|PRS6A_HUMAN	1	0	0	2	2	2	22	16	25	16	16	15
sp|P17987|TCPA_HUMAN	12	18	19	20	25	23	39	48	69	38	35	44
sp|P18031|PTN1_HUMAN	17	27	27	20	20	19	11	11	12	14	10	10
sp|P18054|LOX12_HUMAN	0	0	0	0	0	0	0	0	0	1	0	0
sp|P18074|ERCC2_HUMAN	1	2	1	0	2	2	3	4	3	2	3	4
sp|P18077|RL35A_HUMAN	4	7	6	4	5	3	4	11	7	3	4	5
sp|P18084|ITB5_HUMAN	3	4	6	7	8	9	0	0	3	0	0	2
sp|P18085|ARF4_HUMAN	4	9	7	5	9	8	9	16	21	13	9	15
sp|P18124|RL7_HUMAN	41	51	51	31	32	28	32	47	51	35	31	30
sp|P18206|VINC_HUMAN	25	6	29	29	24	44	67	64	100	72	96	98
sp|P18564|ITB6_HUMAN	1	2	3	2	2	1	1	1	1	1	1	1
sp|P18583|SON_HUMAN	0	0	0	0	0	0	17	23	32	15	22	20
sp|P18615|NELFE_HUMAN	0	0	0	0	0	0	3	0	2	5	3	1
sp|P18621|RL17_HUMAN	19	23	30	15	14	14	15	18	28	18	18	15
sp|P18669|PGAM1_HUMAN;sp|P15259|PGAM2_HUMAN;sp|Q8N0Y7|PGAM4_HUMAN	4	4	6	7	6	8	34	32	36	31	29	27
sp|P18754|RCC1_HUMAN	8	9	11	10	10	18	14	13	14	11	15	17
sp|P18827|SDC1_HUMAN	2	2	1	3	3	1	1	2	2	1	2	2
sp|P18846|ATF1_HUMAN	0	0	0	0	0	0	1	0	0	1	0	0
sp|P18850|ATF6A_HUMAN	1	0	2	0	0	0	0	0	0	0	0	0
sp|P18858|DNLI1_HUMAN	0	0	0	0	0	1	3	0	5	2	0	11
sp|P18859|ATP5J_HUMAN	8	14	12	10	10	8	6	7	8	4	7	3
sp|P18887|XRCC1_HUMAN	1	2	1	2	0	3	2	1	2	2	3	2
sp|P19012|K1C15_HUMAN;CON__P19012	1	0	0	0	0	0	1	0	3	9	4	1
sp|P19013|K2C4_HUMAN;CON__P19013	0	0	0	0	0	1	0	27	10	0	0	5
sp|P19021|AMD_HUMAN	1	0	4	0	0	0	0	0	0	0	0	0
sp|P19022|CADH2_HUMAN;sp|P55283|CADH4_HUMAN	28	46	63	25	26	38	11	20	33	9	12	18
sp|P19075|TSN8_HUMAN	0	0	0	3	3	4	0	0	0	2	3	3
sp|P19105|ML12A_HUMAN	17	0	0	17	0	0	17	0	0	15	0	0
sp|P19174|PLCG1_HUMAN	0	0	0	0	0	0	1	4	11	2	6	9
sp|P19256|LFA3_HUMAN	1	1	1	4	4	4	0	0	0	0	0	0
sp|P19338|NUCL_HUMAN	33	22	20	22	18	29	60	60	80	41	52	56
sp|P19367|HXK1_HUMAN;sp|Q2TB90|HKDC1_HUMAN	38	0	65	56	0	65	21	0	38	23	0	29
sp|P19387|RPB3_HUMAN	0	0	1	0	0	5	4	4	4	8	4	5
sp|P19388|RPAB1_HUMAN	1	4	3	4	3	3	8	10	7	7	4	5
sp|P19404|NDUV2_HUMAN	17	14	14	14	7	8	4	5	4	3	4	4
sp|P19440|GGT1_HUMAN;sp|A6NGU5|GGT3_HUMAN;sp|P36268|GGT2_HUMAN;sp|Q14390|GGTL2_HUMAN;sp|B5MD39|GGTL3_HUMAN	3	0	0	4	0	3	0	0	0	0	1	0
sp|P19447|ERCC3_HUMAN	1	0	3	1	1	4	0	2	1	1	2	2
sp|P19474|RO52_HUMAN	0	0	0	0	0	0	1	0	0	2	0	0
sp|P19484|TFEB_HUMAN	0	0	0	0	0	0	0	0	0	0	0	0
sp|P19525|E2AK2_HUMAN	2	4	4	5	2	7	4	7	11	8	12	14
sp|P19623|SPEE_HUMAN	0	0	0	2	0	3	12	10	15	12	16	18
sp|P19784|CSK22_HUMAN	0	2	1	0	1	3	5	11	16	7	10	8
sp|P19961|AMY2B_HUMAN;sp|P04746|AMYP_HUMAN;sp|P04745|AMY1_HUMAN;CON__Q3MHH8	0	0	0	1	0	0	0	0	0	0	0	0
sp|P20020|AT2B1_HUMAN	65	79	0	79	78	0	21	38	0	19	31	0
sp|P20042|IF2B_HUMAN	8	6	8	13	8	11	13	13	14	16	16	7
sp|P20073|ANXA7_HUMAN	7	6	7	14	7	12	12	8	10	12	13	10
sp|P20290|BTF3_HUMAN	7	7	5	4	8	2	21	24	23	18	19	11
sp|P20336|RAB3A_HUMAN	0	0	1	1	1	1	0	0	0	0	0	0
sp|P20337|RAB3B_HUMAN	0	3	2	3	3	3	0	1	0	0	1	0
sp|P20338|RAB4A_HUMAN;sp|P61018|RAB4B_HUMAN	3	4	5	4	6	4	4	4	3	1	2	1
sp|P20339|RAB5A_HUMAN	7	10	11	9	11	7	6	7	8	7	8	7
sp|P20340|RAB6A_HUMAN	21	0	0	24	0	0	13	0	0	13	0	0
sp|P20585|MSH3_HUMAN	0	0	3	1	2	5	2	0	5	3	2	7
sp|P20618|PSB1_HUMAN	5	5	6	4	8	6	17	16	19	16	12	13
sp|P20645|MPRD_HUMAN	7	13	13	9	13	14	7	9	9	6	9	9
sp|P20674|COX5A_HUMAN	10	22	18	8	16	16	5	8	8	5	10	6
sp|P20700|LMNB1_HUMAN	6	9	21	14	18	34	48	35	50	44	66	57
sp|P20810|ICAL_HUMAN	9	1	0	4	3	5	17	5	7	17	13	15
sp|P20813|CP2B6_HUMAN	2	5	0	0	7	0	0	2	6	0	3	0
sp|P20839|IMDH1_HUMAN	0	0	0	0	0	0	4	5	8	2	1	0
sp|P20908|CO5A1_HUMAN;sp|P12107|COBA1_HUMAN;sp|P13942|COBA2_HUMAN;sp|P25940|CO5A3_HUMAN	46	87	0	23	27	0	3	24	0	0	8	0
sp|P20929|NEBU_HUMAN	0	0	0	0	0	0	2	0	0	1	0	0
sp|P20930|FILA_HUMAN;CON__P20930	0	0	0	0	0	0	3	26	41	0	0	0
sp|P20933|ASPG_HUMAN	0	0	0	0	0	0	0	0	0	0	0	0
sp|P20936|RASA1_HUMAN	0	0	0	0	0	0	2	1	4	1	3	5
sp|P20962|PTMS_HUMAN	0	0	0	0	0	0	1	1	0	1	2	0
sp|P21266|GSTM3_HUMAN	3	1	2	6	7	6	19	19	18	19	22	20
sp|P21281|VATB2_HUMAN;sp|P15313|VATB1_HUMAN	3	1	3	8	5	3	4	4	7	13	9	8
sp|P21283|VATC1_HUMAN	0	0	0	0	4	2	0	0	1	3	2	4
sp|P21291|CSRP1_HUMAN	16	45	36	18	41	37	11	19	23	16	19	17
sp|P21333|FLNA_HUMAN	190	268	258	221	271	248	296	419	416	405	552	405
sp|P21359|NF1_HUMAN	1	2	1	0	0	0	2	8	9	1	1	0
sp|P21397|AOFA_HUMAN	3	3	7	2	8	8	0	1	0	0	1	0
sp|P21399|ACOC_HUMAN;sp|O00408|PDE2A_HUMAN	2	6	8	0	5	5	29	19	35	16	30	22
sp|P21589|5NTD_HUMAN	0	0	0	4	4	2	0	0	0	3	1	1
sp|P21796|VDAC1_HUMAN	160	200	265	169	251	245	31	49	83	45	62	82
sp|P21810|PGS1_HUMAN	3	2	2	0	1	0	1	1	2	0	0	1
sp|P21912|SDHB_HUMAN	14	18	13	7	6	6	8	10	7	0	1	0
sp|P21926|CD9_HUMAN	2	1	1	8	6	6	1	1	1	5	6	2
sp|P21953|ODBB_HUMAN	2	6	4	0	2	1	0	0	0	1	0	0
sp|P21964|COMT_HUMAN	27	29	34	17	24	22	14	22	21	16	15	15
sp|P21980|TGM2_HUMAN;sp|P49221|TGM4_HUMAN	12	0	15	8	0	8	18	0	15	26	0	29
sp|P22033|MUTA_HUMAN	21	8	18	17	14	18	4	0	1	6	2	3
sp|P22059|OSBP1_HUMAN	2	2	2	0	0	2	7	4	6	3	5	3
sp|P22061|PIMT_HUMAN	7	9	10	11	9	9	13	14	11	21	8	14
sp|P22087|FBRL_HUMAN	6	9	17	10	10	22	17	23	34	21	19	25
sp|P22102|PUR2_HUMAN	2	0	1	3	1	5	45	37	49	38	34	36
sp|P22234|PUR6_HUMAN	4	4	6	7	9	8	22	21	33	23	24	26
sp|P22307|NLTP_HUMAN	12	19	21	13	21	26	8	9	10	9	13	7
sp|P22314|UBA1_HUMAN	13	1	10	13	12	19	78	54	89	64	60	86
sp|P22392|NDKB_HUMAN;sp|O60361|NDK8_HUMAN	13	0	0	16	0	0	27	0	0	16	0	0
sp|P22413|ENPP1_HUMAN	0	0	0	0	2	2	0	0	0	0	0	0
sp|P22466|GALA_HUMAN	0	0	0	0	0	0	0	0	0	0	0	0
sp|P22570|ADRO_HUMAN	26	11	18	14	11	13	1	0	1	0	0	0
sp|P22612|KAPCG_HUMAN	1	0	0	0	0	0	2	2	3	2	1	2
sp|P22626|ROA2_HUMAN	31	37	65	39	33	62	97	133	129	86	99	105
sp|P22692|IBP4_HUMAN	1	0	0	0	0	0	0	0	0	0	0	0
sp|P22694|KAPCB_HUMAN	0	0	0	0	1	0	2	3	3	1	2	1
sp|P22695|QCR2_HUMAN	70	74	76	17	14	13	20	15	18	3	1	0
sp|P22830|HEMH_HUMAN	22	15	18	16	13	15	2	2	2	0	1	1
sp|P23025|XPA_HUMAN	0	0	0	0	0	0	0	0	0	0	0	0
sp|P23142|FBLN1_HUMAN	2	0	0	1	1	0	1	0	0	0	0	0
sp|P23193|TCEA1_HUMAN;sp|Q15560|TCEA2_HUMAN	0	0	1	4	0	6	5	2	4	8	11	13
sp|P23229|ITA6_HUMAN	7	3	11	30	29	34	1	0	3	9	9	17
sp|P23246|SFPQ_HUMAN	28	35	40	32	38	41	47	53	51	37	57	47
sp|P23258|TBG1_HUMAN;sp|Q9NRH3|TBG2_HUMAN	1	2	3	6	4	3	7	6	9	5	5	4
sp|P23284|PPIB_HUMAN	72	68	69	59	44	40	32	46	34	28	39	23
sp|P23368|MAOM_HUMAN	53	54	62	23	15	16	11	13	15	3	8	8
sp|P23381|SYWC_HUMAN	1	0	0	5	3	1	17	10	15	39	25	27
sp|P23396|RS3_HUMAN	26	35	43	34	33	37	52	63	90	57	35	62
sp|P23434|GCSH_HUMAN	2	4	7	2	7	6	1	3	3	1	3	1
sp|P23458|JAK1_HUMAN	4	11	15	1	10	6	0	1	10	0	1	1
sp|P23469|PTPRE_HUMAN	1	2	2	0	1	0	0	0	0	0	0	0
sp|P23497|SP100_HUMAN	1	0	0	0	0	0	0	0	0	0	0	0
sp|P23526|SAHH_HUMAN	6	2	2	3	5	3	23	19	22	16	15	16
sp|P23528|COF1_HUMAN	21	18	22	20	34	20	40	47	46	43	54	36
sp|P23588|IF4B_HUMAN	1	0	4	1	1	2	10	7	11	10	9	4
sp|P23634|AT2B4_HUMAN	5	5	7	15	32	30	0	1	1	1	7	5
sp|P23743|DGKA_HUMAN	0	0	0	0	0	0	0	0	0	1	0	1
sp|P23786|CPT2_HUMAN	16	14	20	10	10	17	1	0	0	2	0	1
sp|P23919|KTHY_HUMAN	11	17	15	4	6	3	12	17	14	8	13	9
sp|P23921|RIR1_HUMAN	3	4	5	0	1	3	29	27	36	20	25	24
sp|P24390|ERD21_HUMAN	11	16	15	10	14	12	4	9	6	4	10	9
sp|P24534|EF1B_HUMAN	6	9	9	4	15	11	9	12	15	16	19	18
sp|P24539|AT5F1_HUMAN	57	84	90	52	78	64	13	20	18	11	12	14
sp|P24666|PPAC_HUMAN	1	0	1	0	0	0	11	7	7	6	7	9
sp|P24752|THIL_HUMAN	42	35	51	36	44	44	13	15	13	13	12	11
sp|P24844|MYL9_HUMAN	7	8	8	5	11	6	7	8	6	6	7	8
sp|P24928|RPB1_HUMAN	0	0	0	1	0	0	26	20	18	12	26	16
sp|P24941|CDK2_HUMAN;sp|Q00526|CDK3_HUMAN	1	0	3	1	0	4	17	0	10	10	0	9
sp|P25106|ACKR3_HUMAN	2	3	3	0	0	0	1	1	2	0	0	0
sp|P25205|MCM3_HUMAN	1	4	4	1	4	4	34	26	32	11	35	30
sp|P25208|NFYB_HUMAN	0	0	0	0	0	0	1	0	1	1	0	1
sp|P25325|THTM_HUMAN	11	8	13	4	1	3	5	4	5	4	3	5
sp|P25398|RS12_HUMAN	9	11	12	9	12	10	10	12	13	9	13	10
sp|P25445|TNR6_HUMAN	4	5	1	2	2	1	0	0	1	0	0	0
sp|P25685|DNJB1_HUMAN	11	11	13	13	10	20	9	13	14	10	12	15
sp|P25705|ATPA_HUMAN	266	351	375	225	315	310	51	64	71	39	53	46
sp|P25786|PSA1_HUMAN	0	0	1	0	1	1	22	16	25	20	18	17
sp|P25787|PSA2_HUMAN	3	1	2	4	4	2	13	16	18	15	14	14
sp|P25788|PSA3_HUMAN	1	1	3	2	4	2	9	13	15	8	13	12
sp|P25789|PSA4_HUMAN	3	2	4	3	0	4	14	18	13	14	18	10
sp|P25815|S100P_HUMAN	0	0	0	0	0	0	0	0	0	3	3	3
sp|P26006|ITA3_HUMAN	18	33	26	53	52	41	16	20	23	24	26	28
sp|P26038|MOES_HUMAN	41	43	57	44	55	72	61	87	115	67	64	77
sp|P26196|DDX6_HUMAN	10	14	14	12	13	13	11	7	12	10	13	9
sp|P26232|CTNA2_HUMAN	1	0	0	0	0	0	1	1	1	0	1	1
sp|P26358|DNMT1_HUMAN	10	12	13	2	6	13	23	30	32	3	13	19
sp|P26368|U2AF2_HUMAN	2	6	10	1	5	6	15	24	26	15	16	23
sp|P26373|RL13_HUMAN	36	36	38	30	31	25	21	39	34	26	22	23
sp|P26440|IVD_HUMAN	19	14	17	14	12	13	5	4	4	0	0	0
sp|P26447|S10A4_HUMAN	3	2	2	0	0	0	7	5	6	0	0	0
sp|P26572|MGAT1_HUMAN	2	11	9	5	4	1	0	0	0	0	0	0
sp|P26583|HMGB2_HUMAN	5	9	6	4	14	13	10	12	8	11	15	8
sp|P26599|PTBP1_HUMAN	32	47	52	47	43	50	49	61	73	47	53	56
sp|P26639|SYTC_HUMAN;sp|A2RTX5|SYTC2_HUMAN	19	29	32	32	42	52	57	104	129	92	77	110
sp|P26640|SYVC_HUMAN	7	11	14	5	6	9	56	63	71	36	40	32
sp|P26641|EF1G_HUMAN	32	39	50	37	32	42	63	49	68	47	41	40
sp|P26885|FKBP2_HUMAN	4	6	6	4	7	6	4	6	7	7	7	7
sp|P27105|STOM_HUMAN	27	18	25	44	50	38	20	20	19	26	24	24
sp|P27144|KAD4_HUMAN	16	13	15	18	19	17	6	7	8	9	12	7
sp|P27216|ANX13_HUMAN	2	0	1	0	0	1	1	1	1	0	0	1
sp|P27338|AOFB_HUMAN	3	1	1	18	19	24	0	0	0	1	2	4
sp|P27348|1433T_HUMAN	3	5	7	10	8	6	17	19	13	25	22	12
sp|P27361|MK03_HUMAN	0	0	0	0	0	0	0	0	0	1	0	0
sp|P27449|VATL_HUMAN	6	7	9	5	4	4	1	3	4	1	4	4
sp|P27635|RL10_HUMAN;sp|Q96L21|RL10L_HUMAN	36	30	36	20	21	20	18	24	25	14	19	14
sp|P27694|RFA1_HUMAN	1	1	3	6	5	4	15	16	14	19	21	22
sp|P27695|APEX1_HUMAN	15	10	15	13	11	15	18	14	20	14	18	18
sp|P27701|CD82_HUMAN	0	0	0	0	0	0	0	0	0	0	0	0
sp|P27707|DCK_HUMAN	0	0	0	0	0	0	3	0	2	1	0	0
sp|P27708|PYR1_HUMAN	12	17	6	21	30	24	71	64	63	60	92	79
sp|P27797|CALR_HUMAN	38	46	54	41	44	43	37	50	54	28	43	39
sp|P27816|MAP4_HUMAN	18	35	25	42	39	47	41	57	51	41	52	51
sp|P27824|CALX_HUMAN	118	106	119	119	119	111	37	54	49	38	48	46
sp|P28062|PSB8_HUMAN	0	0	0	0	0	0	5	6	6	2	4	3
sp|P28066|PSA5_HUMAN	3	5	6	7	7	7	14	24	25	14	20	18
sp|P28070|PSB4_HUMAN	3	3	0	2	3	1	6	12	14	8	8	7
sp|P28072|PSB6_HUMAN	0	2	1	0	2	1	9	6	5	6	5	4
sp|P28074|PSB5_HUMAN	6	6	2	7	9	4	19	26	32	20	30	21
sp|P28161|GSTM2_HUMAN	0	0	0	1	0	0	0	0	0	0	0	0
sp|P28288|ABCD3_HUMAN	38	40	48	27	50	48	7	13	15	6	13	12
sp|P28290|SSFA2_HUMAN	5	1	0	1	3	6	0	0	0	0	3	0
sp|P28300|LYOX_HUMAN	1	1	0	2	3	0	0	1	0	1	1	0
sp|P28328|PEX2_HUMAN	1	1	1	1	0	0	0	0	0	0	0	0
sp|P28330|ACADL_HUMAN	0	0	0	1	1	2	0	0	0	0	0	0
sp|P28331|NDUS1_HUMAN	44	66	78	9	8	13	10	16	23	1	2	1
sp|P28340|DPOD1_HUMAN	2	0	2	5	8	9	19	3	16	14	20	33
sp|P28370|SMCA1_HUMAN	0	2	5	0	0	1	4	6	8	1	0	2
sp|P28482|MK01_HUMAN;sp|P31152|MK04_HUMAN;sp|Q16659|MK06_HUMAN	1	0	0	1	0	0	12	0	0	9	0	0
sp|P28702|RXRB_HUMAN	0	1	1	0	0	1	2	1	1	1	1	1
sp|P28715|ERCC5_HUMAN	0	0	0	1	0	0	2	1	2	1	2	0
sp|P28799|GRN_HUMAN	2	5	3	2	5	3	0	1	1	0	3	2
sp|P28838|AMPL_HUMAN	19	15	15	15	15	17	12	14	13	17	15	14
sp|P29084|T2EB_HUMAN	0	0	0	0	0	0	1	0	1	0	0	0
sp|P29144|TPP2_HUMAN	2	1	2	0	3	6	30	46	41	27	47	42
sp|P29218|IMPA1_HUMAN	0	0	0	0	0	0	2	0	1	3	2	2
sp|P29279|CTGF_HUMAN	0	1	1	1	1	0	0	0	0	0	1	0
sp|P29317|EPHA2_HUMAN;sp|Q06187|BTK_HUMAN;sp|P29322|EPHA8_HUMAN	21	0	54	44	0	70	4	0	24	15	0	24
sp|P29320|EPHA3_HUMAN	4	0	11	0	0	0	1	0	2	0	0	0
sp|P29323|EPHB2_HUMAN;sp|P54762|EPHB1_HUMAN	4	0	28	5	0	7	1	0	13	0	0	1
sp|P29372|3MG_HUMAN	1	0	1	0	0	0	6	3	5	2	1	1
sp|P29373|RABP2_HUMAN	0	0	0	0	0	0	2	0	1	0	0	0
sp|P29401|TKT_HUMAN	12	11	13	10	18	15	85	98	149	102	94	137
sp|P29558|RBMS1_HUMAN;sp|Q6XE24|RBMS3_HUMAN	0	1	0	0	0	0	0	0	0	0	2	0
sp|P29590|PML_HUMAN	0	0	0	0	0	0	3	4	6	6	3	6
sp|P29692|EF1D_HUMAN	12	11	11	12	9	11	19	30	28	23	22	20
sp|P29966|MARCS_HUMAN	7	7	9	10	10	8	9	14	9	8	10	9
sp|P29992|GNA11_HUMAN;sp|O95837|GNA14_HUMAN	10	0	13	12	0	13	4	0	9	3	0	8
sp|P30038|AL4A1_HUMAN	4	1	2	1	1	1	0	0	0	0	0	0
sp|P30040|ERP29_HUMAN	14	10	9	25	18	17	15	20	16	22	19	15
sp|P30041|PRDX6_HUMAN	12	9	10	13	15	11	42	41	47	38	44	34
sp|P30042|ES1_HUMAN	15	9	15	15	16	14	5	5	3	6	6	6
sp|P30043|BLVRB_HUMAN	0	0	0	0	0	0	9	7	9	9	11	8
sp|P30044|PRDX5_HUMAN	21	23	25	13	19	16	13	12	11	13	15	11
sp|P30046|DOPD_HUMAN;sp|A6NHG4|DDTL_HUMAN	2	0	1	3	2	2	11	9	8	12	11	8
sp|P30048|PRDX3_HUMAN	33	39	39	21	33	29	9	16	14	9	14	14
sp|P30049|ATPD_HUMAN	9	13	18	7	10	11	4	4	4	2	4	5
sp|P30050|RL12_HUMAN	13	28	25	16	23	13	11	13	20	8	17	10
sp|P30084|ECHM_HUMAN	58	37	49	52	46	41	18	24	22	20	22	18
sp|P30085|KCY_HUMAN	0	0	0	1	2	1	9	10	9	10	10	6
sp|P30086|PEBP1_HUMAN	2	0	0	3	4	3	15	17	23	16	13	22
sp|P30101|PDIA3_HUMAN	59	60	66	52	62	58	45	60	80	50	50	63
sp|P30153|2AAA_HUMAN	7	10	15	16	13	11	30	30	41	34	30	37
sp|P30154|2AAB_HUMAN	0	0	0	0	0	0	2	0	4	0	0	0
sp|P30260|CDC27_HUMAN	0	1	1	0	0	0	1	4	4	1	4	3
sp|P30405|PPIF_HUMAN	12	18	13	11	13	7	7	15	8	5	5	8
sp|P30419|NMT1_HUMAN;sp|O60551|NMT2_HUMAN	1	0	0	3	0	0	9	0	0	7	0	0
sp|P30464|1B15_HUMAN;sp|P30484|1B46_HUMAN;sp|P30495|1B56_HUMAN;sp|P18465|1B57_HUMAN;sp|P30488|1B50_HUMAN;sp|P30487|1B49_HUMAN;sp|P30481|1B44_HUMAN;sp|P30485|1B47_HUMAN;sp|P30483|1B45_HUMAN;sp|P30461|1B13_HUMAN;sp|P03989|1B27_HUMAN	14	0	0	6	0	0	6	0	0	5	0	0
sp|P30508|1C12_HUMAN;sp|Q07000|1C15_HUMAN;sp|Q29960|1C16_HUMAN;sp|P30505|1C08_HUMAN;sp|P30510|1C14_HUMAN;sp|Q9TNN7|1C05_HUMAN;sp|Q95604|1C17_HUMAN;sp|P30504|1C04_HUMAN;sp|P30501|1C02_HUMAN	21	0	0	16	0	0	11	0	0	8	0	0
sp|P30519|HMOX2_HUMAN	34	21	30	25	18	24	9	12	17	4	6	11
sp|P30520|PURA2_HUMAN;sp|Q8N142|PURA1_HUMAN	0	0	0	0	0	0	12	0	0	7	0	0
sp|P30530|UFO_HUMAN	11	0	0	23	0	0	4	0	0	7	0	0
sp|P30533|AMRP_HUMAN	11	4	3	5	3	3	1	1	5	2	4	1
sp|P30536|TSPO_HUMAN	3	6	3	10	8	6	0	0	3	1	0	1
sp|P30566|PUR8_HUMAN	1	0	0	3	2	0	14	11	12	15	13	12
sp|P30622|CLIP1_HUMAN	0	1	0	0	1	0	7	11	8	10	14	5
sp|P30626|SORCN_HUMAN	2	1	1	1	3	2	12	10	8	7	7	6
sp|P30740|ILEU_HUMAN	0	0	0	0	0	0	5	0	0	8	0	3
sp|P30825|CTR1_HUMAN;sp|P52569|CTR2_HUMAN	5	0	14	8	0	15	4	0	8	2	0	2
sp|P30837|AL1B1_HUMAN;sp|P47895|AL1A3_HUMAN	37	42	48	57	75	74	10	13	16	19	16	15
sp|P30838|AL3A1_HUMAN	0	0	0	0	0	0	0	0	4	0	0	1
sp|P30876|RPB2_HUMAN	0	2	1	0	5	6	16	13	27	15	28	34
sp|P31040|SDHA_HUMAN	128	148	157	135	150	141	35	37	42	41	33	37
sp|P31150|GDIA_HUMAN	0	0	0	0	0	0	3	3	5	12	9	6
sp|P31153|METK2_HUMAN;sp|Q00266|METK1_HUMAN	1	1	1	1	1	1	8	12	12	8	13	11
sp|P31323|KAP3_HUMAN	0	0	0	1	0	0	0	0	0	0	0	0
sp|P31327|CPSM_HUMAN	113	36	21	86	105	146	31	4	2	23	26	55
sp|P31350|RIR2_HUMAN;sp|Q7LG56|RIR2B_HUMAN	0	0	0	0	0	0	6	1	0	0	6	0
sp|P31431|SDC4_HUMAN	0	0	0	6	7	1	0	0	1	1	3	1
sp|P31689|DNJA1_HUMAN	10	10	8	7	8	7	12	10	16	9	16	10
sp|P31751|AKT2_HUMAN	0	0	0	0	0	0	1	0	0	1	0	0
sp|P31930|QCR1_HUMAN	87	88	102	48	25	25	24	21	21	8	5	5
sp|P31937|3HIDH_HUMAN	26	12	19	16	10	11	10	4	8	4	0	2
sp|P31939|PUR9_HUMAN	0	0	0	1	7	8	39	33	38	59	44	43
sp|P31942|HNRH3_HUMAN	7	8	11	9	8	10	21	22	26	26	19	20
sp|P31943|HNRH1_HUMAN	18	19	21	21	16	20	48	39	42	49	39	36
sp|P31944|CASPE_HUMAN	0	0	0	0	0	0	0	0	0	0	0	0
sp|P31946|1433B_HUMAN	6	7	8	7	8	5	27	22	21	24	21	17
sp|P31947|1433S_HUMAN	1	1	1	1	0	2	16	12	25	16	19	15
sp|P31948|STIP1_HUMAN	3	11	16	5	8	11	54	48	60	52	36	42
sp|P31949|S10AB_HUMAN	7	6	4	7	14	9	11	18	14	15	21	17
sp|P32004|L1CAM_HUMAN	51	68	54	38	38	25	24	38	29	11	9	7
sp|P32119|PRDX2_HUMAN	2	9	5	6	9	15	10	13	18	15	15	22
sp|P32189|GLPK_HUMAN;sp|Q14409|GLPK3_HUMAN	9	0	2	5	0	2	0	0	0	0	0	0
sp|P32320|CDD_HUMAN	0	0	0	1	1	1	0	4	6	6	8	6
sp|P32321|DCTD_HUMAN	0	0	0	0	0	0	0	1	0	1	4	2
sp|P32322|P5CR1_HUMAN	34	22	52	51	30	46	17	11	10	19	13	13
sp|P32455|GBP1_HUMAN;sp|Q9H0R5|GBP3_HUMAN;sp|P32456|GBP2_HUMAN	0	0	1	0	0	0	4	0	7	14	0	14
sp|P32856|STX2_HUMAN	0	0	0	1	1	3	0	0	0	1	0	0
sp|P32969|RL9_HUMAN	17	31	39	15	21	15	20	40	35	12	19	10
sp|P32970|CD70_HUMAN	3	14	23	15	15	16	1	2	3	3	6	2
sp|P33121|ACSL1_HUMAN	0	0	0	0	0	0	0	0	0	0	0	0
sp|P33176|KINH_HUMAN;sp|Q12840|KIF5A_HUMAN	27	0	41	25	0	34	38	0	52	33	0	41
sp|P33240|CSTF2_HUMAN	0	0	0	0	1	3	2	9	6	4	7	4
sp|P33316|DUT_HUMAN	19	14	15	15	16	15	18	17	15	15	20	18
sp|P33527|MRP1_HUMAN	57	120	110	71	113	97	16	33	30	9	21	31
sp|P33897|ABCD1_HUMAN;sp|Q9UBJ2|ABCD2_HUMAN	30	35	37	19	18	25	5	7	10	5	2	2
sp|P33908|MA1A1_HUMAN	2	2	2	0	0	0	0	0	0	0	0	0
sp|P33947|ERD22_HUMAN	2	15	8	1	5	3	1	7	2	1	2	2
sp|P33991|MCM4_HUMAN;sp|Q9UJA3|MCM8_HUMAN	0	0	0	1	0	0	27	0	0	26	0	0
sp|P33992|MCM5_HUMAN	0	2	4	0	3	4	24	17	24	15	30	25
sp|P33993|MCM7_HUMAN	0	2	3	2	4	2	29	30	29	29	29	43
sp|P34741|SDC2_HUMAN	1	1	0	4	6	1	0	1	0	2	0	0
sp|P34810|CD68_HUMAN	1	0	0	1	0	0	0	0	0	0	0	0
sp|P34896|GLYC_HUMAN	1	0	0	1	0	0	3	0	2	3	3	0
sp|P34897|GLYM_HUMAN	95	144	161	127	169	153	28	28	25	30	32	31
sp|P34932|HSP74_HUMAN	10	5	5	9	10	8	69	53	90	63	57	67
sp|P34949|MPI_HUMAN	0	0	0	0	0	0	0	0	0	0	0	0
sp|P35052|GPC1_HUMAN	8	8	3	11	25	3	6	12	14	2	19	4
sp|P35080|PROF2_HUMAN	0	0	0	0	0	0	3	4	4	4	2	2
sp|P35221|CTNA1_HUMAN;sp|Q9UI47|CTNA3_HUMAN	65	60	0	50	57	0	34	35	0	8	33	0
sp|P35222|CTNB1_HUMAN	30	77	71	24	29	36	12	25	29	11	15	11
sp|P35232|PHB_HUMAN	73	97	114	120	110	110	19	23	18	25	27	23
sp|P35237|SPB6_HUMAN	0	0	0	0	0	0	10	3	11	18	13	12
sp|P35240|MERL_HUMAN	0	0	0	2	0	0	0	0	0	1	0	0
sp|P35241|RADI_HUMAN	3	4	5	4	4	3	9	12	17	9	11	8
sp|P35244|RFA3_HUMAN	1	1	1	1	3	1	3	5	5	3	7	6
sp|P35249|RFC4_HUMAN	5	11	10	11	10	10	8	10	12	9	11	12
sp|P35250|RFC2_HUMAN	2	3	4	4	2	3	8	10	9	10	9	9
sp|P35251|RFC1_HUMAN	1	5	6	3	9	8	5	6	8	4	7	10
sp|P35268|RL22_HUMAN	16	18	17	14	14	13	15	14	17	14	14	15
sp|P35269|T2FA_HUMAN	0	0	0	0	0	0	4	2	4	1	1	0
sp|P35270|SPRE_HUMAN	1	3	4	1	3	10	3	5	3	0	9	5
sp|P35504|UD15_HUMAN	0	0	0	0	0	0	0	0	0	0	0	0
sp|P35520|CBS_HUMAN;sp|P0DN79|CBSL_HUMAN	0	1	1	0	1	0	3	4	3	3	5	7
sp|P35527|K1C9_HUMAN;CON__P35527	61	116	62	44	109	54	102	71	56	54	135	124
sp|P35555|FBN1_HUMAN	8	14	6	3	11	2	0	1	4	1	1	1
sp|P35556|FBN2_HUMAN	3	3	0	0	1	0	0	0	0	0	0	0
sp|P35573|GDE_HUMAN	0	0	0	0	0	0	11	11	12	8	13	2
sp|P35579|MYH9_HUMAN	210	175	0	198	173	0	388	564	0	496	645	0
sp|P35580|MYH10_HUMAN	119	43	30	0	0	0	153	108	110	16	2	0
sp|P35606|COPB2_HUMAN	7	12	12	12	11	8	29	44	48	20	24	29
sp|P35610|SOAT1_HUMAN	13	24	21	6	11	7	3	13	12	1	5	5
sp|P35611|ADDA_HUMAN	2	0	0	3	0	1	2	0	1	1	2	1
sp|P35612|ADDB_HUMAN	0	0	0	0	1	0	1	1	0	2	2	0
sp|P35613|BASI_HUMAN	35	47	52	33	48	41	17	25	27	16	23	23
sp|P35637|FUS_HUMAN	3	6	9	2	4	7	16	17	19	14	13	19
sp|P35658|NU214_HUMAN	2	9	3	11	16	12	17	28	19	15	40	31
sp|P35659|DEK_HUMAN	0	3	4	1	2	3	12	16	14	15	16	13
sp|P35754|GLRX1_HUMAN	0	0	0	0	0	0	2	0	4	3	3	1
sp|P35790|CHKA_HUMAN	0	0	0	0	0	0	1	0	0	0	0	0
sp|P35908|K22E_HUMAN;CON__P35908v2;CON__P35908;sp|Q3SY84|K2C71_HUMAN;CON__Q3SY84;sp|Q7RTS7|K2C74_HUMAN;CON__Q7RTS7;sp|Q86Y46|K2C73_HUMAN;CON__Q32MB2	51	0	0	53	0	0	85	0	0	44	0	0
sp|P35914|HMGCL_HUMAN	6	0	0	4	0	0	1	0	0	1	0	0
sp|P35998|PRS7_HUMAN	0	1	2	0	0	0	22	19	25	19	20	21
sp|P36404|ARL2_HUMAN	6	4	4	0	1	1	7	4	5	4	6	2
sp|P36405|ARL3_HUMAN	0	0	0	1	0	0	7	7	7	5	5	5
sp|P36406|TRI23_HUMAN	1	1	1	1	1	1	1	1	1	2	1	1
sp|P36507|MP2K2_HUMAN	1	2	0	0	2	0	5	6	4	2	1	1
sp|P36508|ZNF76_HUMAN	0	0	0	0	0	0	0	0	0	1	0	0
sp|P36542|ATPG_HUMAN	40	60	65	33	50	42	11	13	23	10	13	13
sp|P36543|VATE1_HUMAN;sp|Q96A05|VATE2_HUMAN	2	3	3	8	7	4	5	6	5	6	8	9
sp|P36551|HEM6_HUMAN	10	7	12	10	7	10	4	9	9	1	4	4
sp|P36578|RL4_HUMAN	56	84	86	60	58	63	46	60	72	38	26	38
sp|P36639|8ODP_HUMAN	2	1	1	0	1	1	1	3	3	2	2	4
sp|P36776|LONM_HUMAN	98	83	102	54	64	73	27	18	28	19	23	20
sp|P36871|PGM1_HUMAN	0	1	0	0	0	0	16	7	6	16	14	16
sp|P36873|PP1G_HUMAN	1	3	3	1	2	3	2	4	3	3	1	4
sp|P36915|GNL1_HUMAN	0	0	0	0	0	0	5	3	3	5	0	0
sp|P36952|SPB5_HUMAN	0	0	0	2	1	1	13	15	21	25	22	30
sp|P36954|RPB9_HUMAN	0	0	0	0	0	0	2	1	2	2	3	3
sp|P36957|ODO2_HUMAN	34	33	33	17	21	18	9	6	6	4	3	3
sp|P36969|GPX4_HUMAN	0	0	0	0	1	3	0	0	1	0	1	2
sp|P37108|SRP14_HUMAN	8	15	10	11	12	13	15	16	18	9	13	11
sp|P37198|NUP62_HUMAN	0	1	1	0	4	5	1	6	12	5	9	10
sp|P37235|HPCL1_HUMAN;sp|P84074|HPCA_HUMAN;sp|P61601|NCALD_HUMAN	2	6	7	2	5	4	4	12	9	3	6	5
sp|P37268|FDFT_HUMAN	12	17	16	8	9	8	5	3	5	1	2	2
sp|P37802|TAGL2_HUMAN	8	10	0	13	17	0	31	50	0	42	54	0
sp|P37837|TALDO_HUMAN	0	0	0	0	1	2	15	11	13	12	14	15
sp|P38117|ETFB_HUMAN	29	27	28	15	20	22	15	16	12	6	14	12
sp|P38159|RBMX_HUMAN;sp|O75526|RMXL2_HUMAN;sp|Q8IZ40|RCOR2_HUMAN;sp|Q8N7X1|RMXL3_HUMAN	2	5	8	2	4	8	17	17	24	16	19	16
sp|P38432|COIL_HUMAN	0	0	0	0	0	1	1	2	2	3	2	2
sp|P38435|VKGC_HUMAN	14	11	15	11	19	14	0	1	1	0	3	0
sp|P38606|VATA_HUMAN	5	6	8	11	12	11	21	16	23	26	18	21
sp|P38646|GRP75_HUMAN	160	205	305	195	299	287	58	73	94	79	69	76
sp|P38919|IF4A3_HUMAN	7	10	12	9	3	10	26	26	26	22	18	23
sp|P39019|RS19_HUMAN	9	12	10	9	11	13	14	15	15	9	13	12
sp|P39023|RL3_HUMAN;sp|Q92901|RL3L_HUMAN	52	68	75	44	51	47	48	61	90	45	60	49
sp|P39060|COIA1_HUMAN	2	1	1	0	0	0	0	1	0	0	0	0
sp|P39210|MPV17_HUMAN	2	1	2	1	2	2	0	0	0	0	0	0
sp|P39656|OST48_HUMAN	76	95	103	55	80	82	21	35	37	19	19	35
sp|P39687|AN32A_HUMAN;sp|O95626|AN32D_HUMAN;sp|O43423|AN32C_HUMAN	2	0	4	6	0	6	12	0	17	15	0	16
sp|P39748|FEN1_HUMAN	11	10	12	15	15	14	16	11	15	15	18	18
sp|P40121|CAPG_HUMAN	0	0	0	2	2	1	6	0	4	16	17	15
sp|P40123|CAP2_HUMAN	0	0	0	0	0	0	3	0	2	3	0	0
sp|P40189|IL6RB_HUMAN	6	10	17	8	17	12	1	2	5	1	4	2
sp|P40222|TXLNA_HUMAN	3	7	2	4	5	4	12	8	7	8	6	5
sp|P40227|TCPZ_HUMAN;sp|Q92526|TCPW_HUMAN	8	11	15	15	11	15	25	36	39	33	36	31
sp|P40261|NNMT_HUMAN	0	3	2	1	6	4	10	7	9	15	11	11
sp|P40306|PSB10_HUMAN	0	0	0	0	0	0	1	1	0	0	0	0
sp|P40429|RL13A_HUMAN;sp|Q6NVV1|R13P3_HUMAN	25	30	26	23	22	14	19	30	30	20	21	19
sp|P40616|ARL1_HUMAN	4	6	3	3	3	4	5	5	5	6	6	3
sp|P40763|STAT3_HUMAN	1	7	5	1	2	2	15	11	16	9	9	6
sp|P40818|UBP8_HUMAN	0	0	0	1	1	1	3	1	2	1	4	0
sp|P40925|MDHC_HUMAN	4	2	5	6	4	7	15	13	13	13	17	14
sp|P40926|MDHM_HUMAN	162	136	151	131	123	129	37	38	44	40	27	31
sp|P40937|RFC5_HUMAN	2	6	4	3	8	13	6	10	12	8	14	16
sp|P40938|RFC3_HUMAN	3	5	6	3	6	9	5	11	13	7	11	15
sp|P40939|ECHA_HUMAN	139	142	176	138	179	183	34	20	45	33	33	39
sp|P41091|IF2G_HUMAN;sp|Q2VIR3|IF2GL_HUMAN	7	17	17	13	18	19	15	30	28	25	25	31
sp|P41208|CETN2_HUMAN	0	0	0	0	0	0	1	1	2	0	3	0
sp|P41214|EIF2D_HUMAN	1	0	0	1	0	1	2	2	5	2	0	2
sp|P41221|WNT5A_HUMAN;sp|Q9H1J7|WNT5B_HUMAN	9	6	7	7	9	6	0	4	5	0	4	3
sp|P41223|BUD31_HUMAN	0	2	3	1	2	3	4	8	10	5	7	4
sp|P41227|NAA10_HUMAN;sp|Q9BSU3|NAA11_HUMAN	0	0	1	0	0	0	7	8	9	8	11	9
sp|P41240|CSK_HUMAN	0	0	0	0	0	0	3	1	2	1	0	0
sp|P41247|PLPL4_HUMAN	5	7	9	8	6	8	0	0	0	0	0	0
sp|P41250|GARS_HUMAN	21	19	27	21	26	23	24	30	46	29	35	28
sp|P41252|SYIC_HUMAN	7	34	34	48	47	58	56	63	71	76	78	89
sp|P41273|TNFL9_HUMAN	0	2	2	1	1	2	0	0	2	0	0	0
sp|P41439|FOLR3_HUMAN	0	0	0	0	0	0	0	0	0	0	0	0
sp|P41440|S19A1_HUMAN	4	7	5	1	0	0	0	0	0	0	0	0
sp|P41567|EIF1_HUMAN	6	5	6	5	2	2	6	11	10	3	8	6
sp|P41743|KPCI_HUMAN	0	0	0	0	0	0	0	2	2	1	0	0
sp|P42126|ECI1_HUMAN	15	20	13	13	24	19	5	10	8	8	14	10
sp|P42166|LAP2A_HUMAN	39	26	31	32	36	43	35	33	39	36	30	42
sp|P42167|LAP2B_HUMAN	11	6	9	6	7	11	7	4	7	12	8	6
sp|P42224|STAT1_HUMAN	0	0	0	1	0	2	11	13	12	26	17	19
sp|P42285|MTREX_HUMAN	14	13	26	12	12	25	23	27	39	25	23	30
sp|P42330|AK1C3_HUMAN;sp|P17516|AK1C4_HUMAN	1	0	0	0	3	0	10	11	0	11	24	0
sp|P42345|MTOR_HUMAN	0	12	5	6	30	12	19	28	18	10	30	24
sp|P42356|PI4KA_HUMAN;sp|Q8N8J0|PI4P1_HUMAN;sp|A4QPH2|PI4P2_HUMAN	0	2	1	2	2	4	3	1	1	2	1	0
sp|P42566|EPS15_HUMAN	1	0	1	0	0	1	2	1	6	3	2	10
sp|P42574|CASP3_HUMAN	0	0	0	0	0	0	1	0	0	1	2	1
sp|P42677|RS27_HUMAN	7	9	8	5	5	5	5	13	15	5	7	9
sp|P42695|CNDD3_HUMAN	0	1	1	0	2	1	6	9	10	0	4	0
sp|P42696|RBM34_HUMAN	0	2	0	1	1	0	2	1	3	2	0	0
sp|P42704|LPPRC_HUMAN	254	277	347	238	302	267	82	114	104	69	107	99
sp|P42765|THIM_HUMAN	97	62	80	96	80	94	25	26	25	23	25	24
sp|P42766|RL35_HUMAN	4	7	7	6	5	5	4	5	4	2	4	3
sp|P42771|CDN2A_HUMAN;sp|P42772|CDN2B_HUMAN	6	0	3	4	0	3	12	0	13	10	0	10
sp|P42785|PCP_HUMAN	1	1	2	0	1	2	3	4	3	3	3	5
sp|P42858|HD_HUMAN	0	0	0	0	0	0	3	2	1	10	6	1
sp|P42892|ECE1_HUMAN	31	39	55	44	57	68	19	27	32	18	19	27
sp|P43003|EAA1_HUMAN	6	2	4	6	5	3	1	0	0	1	0	0
sp|P43007|SATT_HUMAN	6	9	9	11	20	20	0	2	2	1	6	7
sp|P43034|LIS1_HUMAN	1	0	1	1	0	1	11	7	12	8	10	8
sp|P43121|MUC18_HUMAN	30	27	43	33	28	38	9	20	17	15	13	15
sp|P43155|CACP_HUMAN	6	0	1	2	2	4	0	0	0	0	0	0
sp|P43243|MATR3_HUMAN	23	19	32	19	17	33	51	49	77	36	44	67
sp|P43246|MSH2_HUMAN	1	1	2	2	3	9	15	4	9	18	14	17
sp|P43304|GPDM_HUMAN	63	54	92	52	65	79	12	11	15	10	14	8
sp|P43307|SSRA_HUMAN	12	20	23	13	16	17	8	7	10	9	7	9
sp|P43353|AL3B1_HUMAN;sp|P48448|AL3B2_HUMAN	3	0	0	5	1	2	0	0	0	1	0	0
sp|P43487|RANG_HUMAN	2	1	0	2	3	3	19	13	10	20	12	10
sp|P43490|NAMPT_HUMAN	0	1	1	3	2	1	13	15	18	14	18	18
sp|P43686|PRS6B_HUMAN	1	0	1	0	1	0	18	17	23	16	16	19
sp|P43897|EFTS_HUMAN	25	19	37	20	17	31	11	9	12	13	10	13
sp|P45877|PPIC_HUMAN	2	2	2	4	1	1	3	4	1	2	1	1
sp|P45880|VDAC2_HUMAN	90	140	184	123	142	147	15	35	38	32	32	40
sp|P45954|ACDSB_HUMAN	7	0	0	3	2	7	0	0	0	0	0	0
sp|P45973|CBX5_HUMAN	0	0	0	0	0	0	15	19	17	14	19	17
sp|P45974|UBP5_HUMAN	0	0	0	1	0	1	24	15	19	22	28	22
sp|P46013|KI67_HUMAN	1	13	5	4	9	9	58	40	62	28	44	40
sp|P46060|RAGP1_HUMAN	3	12	9	4	9	8	22	32	40	16	20	26
sp|P46063|RECQ1_HUMAN	4	3	8	14	12	14	9	8	15	16	16	17
sp|P46087|NOP2_HUMAN	7	10	9	14	13	19	16	9	19	16	12	16
sp|P46100|ATRX_HUMAN	0	0	0	0	0	0	5	11	5	5	6	2
sp|P46108|CRK_HUMAN	0	0	0	0	0	0	5	7	9	4	5	6
sp|P46109|CRKL_HUMAN	0	0	0	0	0	0	4	4	7	2	6	7
sp|P46199|IF2M_HUMAN	9	6	10	8	5	7	1	0	0	0	0	0
sp|P46379|BAG6_HUMAN	4	12	18	5	8	8	20	26	25	13	23	19
sp|P46459|NSF_HUMAN	33	28	32	19	18	25	13	13	19	9	8	13
sp|P46736|BRCC3_HUMAN	0	0	0	0	0	0	4	1	2	7	3	4
sp|P46776|RL27A_HUMAN	9	12	18	7	9	10	8	14	17	8	6	8
sp|P46777|RL5_HUMAN	30	25	36	23	13	32	32	56	74	37	47	48
sp|P46778|RL21_HUMAN	9	15	17	9	7	9	7	19	19	7	9	9
sp|P46779|RL28_HUMAN	10	16	15	8	10	9	7	15	16	6	6	5
sp|P46781|RS9_HUMAN	15	16	19	12	12	19	16	39	37	24	14	26
sp|P46782|RS5_HUMAN	8	16	20	15	17	19	19	27	32	19	24	20
sp|P46783|RS10_HUMAN;sp|Q9NQ39|RS10L_HUMAN	13	22	16	17	17	14	19	24	24	19	23	17
sp|P46821|MAP1B_HUMAN;sp|P78559|MAP1A_HUMAN	17	0	27	73	0	105	63	0	72	112	0	128
sp|P46926|GNPI1_HUMAN	1	0	0	1	1	1	13	10	13	14	20	16
sp|P46934|NEDD4_HUMAN	0	0	0	0	0	0	1	1	2	1	1	0
sp|P46937|YAP1_HUMAN	0	0	0	0	0	0	2	2	0	2	3	0
sp|P46939|UTRO_HUMAN	8	25	3	14	21	0	23	20	37	32	26	3
sp|P46940|IQGA1_HUMAN	124	200	158	149	214	171	130	174	190	133	153	173
sp|P46976|GLYG_HUMAN	0	0	0	0	0	0	3	3	0	3	3	0
sp|P46977|STT3A_HUMAN	41	49	62	33	50	37	15	25	20	8	18	16
sp|P47224|MSS4_HUMAN	0	0	0	0	0	0	1	2	2	2	1	1
sp|P47712|PA24A_HUMAN	1	1	3	0	0	0	9	3	4	0	0	1
sp|P47755|CAZA2_HUMAN	2	6	5	3	5	5	12	27	29	7	16	20
sp|P47756|CAPZB_HUMAN	3	4	8	6	9	14	15	18	31	18	23	24
sp|P47813|IF1AX_HUMAN;sp|O14602|IF1AY_HUMAN	2	2	3	0	2	2	10	10	10	9	11	8
sp|P47893|OR3A2_HUMAN;sp|P47888|OR3A3_HUMAN	7	9	8	10	11	4	11	13	8	15	10	10
sp|P47897|SYQ_HUMAN	6	17	17	12	14	21	31	35	43	32	38	33
sp|P47914|RL29_HUMAN	4	9	8	3	3	2	3	2	2	2	3	3
sp|P47985|UCRI_HUMAN;sp|P0C7P4|UCRIL_HUMAN	33	33	34	6	8	7	11	14	11	3	6	2
sp|P48047|ATPO_HUMAN	39	48	50	39	36	32	10	13	16	10	12	12
sp|P48059|LIMS1_HUMAN	0	0	0	2	0	0	0	0	0	0	0	0
sp|P48060|GLIP1_HUMAN	3	6	7	5	4	4	1	3	4	1	2	1
sp|P48067|SC6A9_HUMAN	1	0	0	2	7	4	0	0	0	0	0	0
sp|P48147|PPCE_HUMAN	0	0	0	0	0	0	8	7	15	5	4	4
sp|P48163|MAOX_HUMAN	0	0	0	0	0	0	6	10	14	1	10	5
sp|P48200|IREB2_HUMAN	0	0	0	0	0	0	3	2	7	1	0	1
sp|P48444|COPD_HUMAN	1	4	5	5	7	4	11	13	13	9	11	13
sp|P48449|ERG7_HUMAN	19	23	32	12	16	12	7	12	15	4	10	4
sp|P48506|GSH1_HUMAN	0	0	0	0	0	0	2	0	2	1	2	0
sp|P48507|GSH0_HUMAN	0	0	0	0	0	0	4	3	6	3	3	4
sp|P48509|CD151_HUMAN	3	10	8	6	11	8	3	5	4	4	4	4
sp|P48556|PSMD8_HUMAN	0	2	3	5	4	4	8	8	11	10	9	9
sp|P48634|PRC2A_HUMAN	2	2	4	6	3	6	2	5	3	5	7	2
sp|P48637|GSHB_HUMAN	4	2	2	3	1	5	12	9	7	8	6	5
sp|P48643|TCPE_HUMAN	7	19	21	22	31	20	41	59	60	47	45	55
sp|P48651|PTSS1_HUMAN	14	15	15	15	21	23	2	6	7	5	7	7
sp|P48681|NEST_HUMAN	0	0	0	0	0	0	1	0	0	1	14	4
sp|P48723|HSP13_HUMAN	5	3	3	4	5	4	0	2	4	0	1	0
sp|P48729|KC1A_HUMAN;sp|Q8N752|KC1AL_HUMAN	2	7	9	4	7	8	7	10	13	5	9	8
sp|P48730|KC1D_HUMAN;sp|P49674|KC1E_HUMAN	0	2	1	1	0	0	1	0	0	0	2	1
sp|P48735|IDHP_HUMAN	31	17	20	13	6	6	10	1	3	1	2	2
sp|P48739|PIPNB_HUMAN	4	1	4	2	6	2	17	11	12	15	11	11
sp|P48960|CD97_HUMAN	24	0	31	21	0	29	6	0	14	12	0	9
sp|P49005|DPOD2_HUMAN	0	0	0	0	0	0	7	2	2	5	3	1
sp|P49006|MRP_HUMAN	2	1	2	2	2	2	2	2	2	1	2	2
sp|P49069|CAMLG_HUMAN	2	3	5	1	1	4	0	0	1	0	0	0
sp|P49184|DNSL1_HUMAN	0	0	0	0	0	0	0	0	0	0	0	0
sp|P49189|AL9A1_HUMAN	7	7	6	6	5	4	7	4	3	7	5	3
sp|P49207|RL34_HUMAN	7	7	10	4	9	5	4	6	5	3	5	5
sp|P49247|RPIA_HUMAN	0	0	0	0	0	0	0	4	0	0	3	0
sp|P49257|LMAN1_HUMAN	38	55	53	30	30	36	14	9	14	11	9	13
sp|P49321|NASP_HUMAN	0	0	0	1	3	1	30	19	23	29	31	29
sp|P49327|FAS_HUMAN	43	64	39	11	36	21	220	203	216	78	122	96
sp|P49354|FNTA_HUMAN	0	0	0	0	0	0	0	0	0	0	0	0
sp|P49366|DHYS_HUMAN	0	0	0	0	0	0	6	3	4	0	0	0
sp|P49368|TCPG_HUMAN	17	19	24	24	30	21	31	48	42	36	43	44
sp|P49406|RM19_HUMAN	10	13	15	3	4	4	4	5	6	0	0	0
sp|P49411|EFTU_HUMAN	187	191	224	132	161	145	37	39	48	36	44	40
sp|P49419|AL7A1_HUMAN	49	27	31	31	29	31	17	11	12	21	16	12
sp|P49427|UB2R1_HUMAN	0	0	0	0	0	0	2	2	1	0	1	1
sp|P49441|INPP_HUMAN	0	0	0	0	0	0	1	0	0	1	1	1
sp|P49454|CENPF_HUMAN	11	0	10	5	0	10	27	0	6	13	0	6
sp|P49458|SRP09_HUMAN	6	8	5	3	7	4	4	8	8	4	9	5
sp|P49459|UBE2A_HUMAN;sp|P63146|UBE2B_HUMAN	0	0	0	0	0	0	2	4	3	1	3	3
sp|P49585|PCY1A_HUMAN;sp|Q9Y5K3|PCY1B_HUMAN	0	0	0	0	1	0	1	1	2	0	1	0
sp|P49588|SYAC_HUMAN	1	0	0	4	5	4	30	27	36	44	39	43
sp|P49589|SYCC_HUMAN	0	0	2	1	3	4	9	8	16	20	32	21
sp|P49590|SYHM_HUMAN	12	16	21	16	27	21	3	7	6	2	8	6
sp|P49591|SYSC_HUMAN	4	17	15	13	15	14	15	18	19	18	25	18
sp|P49593|PPM1F_HUMAN	0	0	0	0	0	0	1	0	0	0	0	0
sp|P49642|PRI1_HUMAN	0	0	0	0	0	0	4	2	0	4	2	0
sp|P49643|PRI2_HUMAN	0	0	0	1	0	0	5	5	5	5	7	8
sp|P49711|CTCF_HUMAN	0	0	3	0	0	2	2	1	3	0	0	1
sp|P49720|PSB3_HUMAN	3	4	4	6	5	2	14	19	15	16	16	14
sp|P49721|PSB2_HUMAN	5	3	4	5	4	4	13	22	17	22	16	13
sp|P49736|MCM2_HUMAN	0	0	0	0	0	4	37	31	37	31	37	41
sp|P49748|ACADV_HUMAN	99	76	98	102	99	112	26	24	27	25	27	31
sp|P49750|YLPM1_HUMAN	0	0	0	0	0	0	2	14	14	4	8	4
sp|P49753|ACOT2_HUMAN	23	0	1	14	2	2	7	0	0	5	0	0
sp|P49755|TMEDA_HUMAN	30	36	26	28	33	22	11	15	16	8	13	14
sp|P49756|RBM25_HUMAN	0	1	1	0	0	0	10	13	12	9	10	12
sp|P49768|PSN1_HUMAN;sp|P49810|PSN2_HUMAN	3	5	4	4	7	7	1	1	1	2	3	1
sp|P49770|EI2BB_HUMAN	0	1	1	0	0	0	3	5	8	3	3	4
sp|P49773|HINT1_HUMAN	0	1	2	2	4	4	15	12	14	16	17	11
sp|P49789|FHIT_HUMAN	1	0	0	0	0	0	0	0	0	0	0	0
sp|P49790|NU153_HUMAN	0	1	0	0	1	0	9	21	12	6	20	13
sp|P49792|RBP2_HUMAN;sp|O14715|RGPD8_HUMAN;sp|Q99666|RGPD5_HUMAN;sp|P0DJD0|RGPD1_HUMAN;sp|P0DJD1|RGPD2_HUMAN	2	0	0	8	0	0	65	0	0	66	0	0
sp|P49795|RGS19_HUMAN	0	0	0	0	0	1	0	0	0	0	0	0
sp|P49815|TSC2_HUMAN	0	0	0	0	0	1	1	1	2	0	0	0
sp|P49821|NDUV1_HUMAN	23	30	36	15	11	8	6	4	10	0	1	1
sp|P49841|GSK3B_HUMAN	0	0	0	0	0	0	1	1	1	2	2	1
sp|P49903|SPS1_HUMAN	0	0	0	0	0	0	4	6	9	3	8	5
sp|P49914|MTHFS_HUMAN	1	1	1	0	0	0	2	2	2	1	1	1
sp|P49915|GUAA_HUMAN	0	0	0	0	0	0	18	16	24	18	16	12
sp|P49916|DNLI3_HUMAN	6	7	2	8	4	4	5	4	6	3	2	1
sp|P49917|DNLI4_HUMAN	0	0	0	0	0	0	0	0	0	0	0	0
sp|P49959|MRE11_HUMAN	5	4	4	5	11	10	10	6	10	12	11	12
sp|P50135|HNMT_HUMAN	0	0	0	0	0	0	1	0	0	1	2	3
sp|P50148|GNAQ_HUMAN	2	3	2	1	1	1	0	1	1	0	0	2
sp|P50151|GBG10_HUMAN	0	0	0	0	0	0	0	0	0	0	0	0
sp|P50213|IDH3A_HUMAN	19	20	25	15	19	21	11	12	17	9	11	15
sp|P50281|MMP14_HUMAN	1	2	0	0	0	0	0	0	0	0	0	0
sp|P50336|PPOX_HUMAN	15	10	13	10	7	7	1	0	0	0	0	0
sp|P50395|GDIB_HUMAN	4	1	4	4	7	5	32	25	42	34	29	31
sp|P50402|EMD_HUMAN	20	16	27	14	17	21	15	16	20	17	16	19
sp|P50416|CPT1A_HUMAN;sp|Q92523|CPT1B_HUMAN	111	0	98	149	0	135	18	0	15	25	0	36
sp|P50440|GATM_HUMAN	0	0	0	0	0	0	1	0	0	1	1	0
sp|P50443|S26A2_HUMAN	0	4	4	10	10	12	0	1	0	0	4	2
sp|P50452|SPB8_HUMAN	0	0	0	0	0	0	0	0	0	1	0	0
sp|P50454|SERPH_HUMAN	166	216	266	142	173	183	68	100	148	90	76	89
sp|P50502|F10A1_HUMAN;sp|Q8NFI4|F10A5_HUMAN;sp|Q8IZP2|ST134_HUMAN	4	2	5	3	6	7	17	12	14	17	13	11
sp|P50552|VASP_HUMAN	6	7	10	21	14	17	7	9	14	13	16	18
sp|P50570|DYN2_HUMAN;sp|Q05193|DYN1_HUMAN;sp|Q9UQ16|DYN3_HUMAN	12	0	12	18	0	19	5	0	19	2	0	9
sp|P50579|MAP2_HUMAN	0	1	1	0	1	0	4	7	7	0	5	5
sp|P50583|AP4A_HUMAN	0	0	0	0	0	0	2	4	5	3	6	4
sp|P50613|CDK7_HUMAN	1	0	0	1	0	1	1	3	5	1	4	4
sp|P50748|KNTC1_HUMAN	1	0	0	0	0	0	7	1	1	2	4	3
sp|P50750|CDK9_HUMAN	0	0	0	1	0	1	1	0	2	1	0	2
sp|P50851|LRBA_HUMAN;sp|Q8NFP9|NBEA_HUMAN	0	0	0	0	0	0	10	0	0	8	0	0
sp|P50895|BCAM_HUMAN	0	0	0	17	24	21	0	0	0	8	7	11
sp|P50897|PPT1_HUMAN	5	3	2	1	5	7	7	7	8	7	8	10
sp|P50914|RL14_HUMAN	16	23	19	15	16	14	12	18	20	13	10	16
sp|P50990|TCPQ_HUMAN	12	28	26	21	33	29	44	57	65	42	49	51
sp|P50991|TCPD_HUMAN	11	23	16	23	29	26	37	44	51	39	46	43
sp|P50995|ANX11_HUMAN	5	0	3	19	16	16	11	4	7	14	17	17
sp|P51003|PAPOA_HUMAN;sp|Q9NRJ5|PAPOB_HUMAN;sp|Q9BWT3|PAPOG_HUMAN	0	0	0	0	0	0	5	0	0	2	0	0
sp|P51114|FXR1_HUMAN	8	17	13	8	4	2	10	17	11	4	6	4
sp|P51116|FXR2_HUMAN	5	6	14	2	4	7	6	7	14	2	3	6
sp|P51148|RAB5C_HUMAN	30	40	38	22	22	25	12	19	21	11	16	16
sp|P51149|RAB7A_HUMAN	36	49	47	39	40	44	22	32	37	28	27	28
sp|P51151|RAB9A_HUMAN;sp|Q9NP90|RAB9B_HUMAN	6	12	9	10	11	8	4	7	6	4	4	7
sp|P51153|RAB13_HUMAN;sp|P59190|RAB15_HUMAN;sp|Q96E17|RAB3C_HUMAN	6	0	0	3	0	0	4	0	0	1	0	0
sp|P51159|RB27A_HUMAN	7	6	7	5	5	7	5	3	2	2	3	2
sp|P51398|RT29_HUMAN	30	36	45	19	27	22	4	10	12	3	6	4
sp|P51452|DUS3_HUMAN	0	0	0	0	0	0	8	6	5	7	4	7
sp|P51530|DNA2_HUMAN	0	0	0	2	0	1	1	0	0	1	2	0
sp|P51531|SMCA2_HUMAN	0	0	0	0	0	0	1	3	0	0	6	3
sp|P51532|SMCA4_HUMAN	10	17	15	4	7	8	24	40	33	9	26	14
sp|P51553|IDH3G_HUMAN	21	26	28	11	12	15	4	7	7	1	5	6
sp|P51570|GALK1_HUMAN	0	0	0	0	0	0	2	0	0	2	0	2
sp|P51571|SSRD_HUMAN	35	44	46	30	24	31	7	13	14	8	9	13
sp|P51572|BAP31_HUMAN	26	23	20	17	24	17	11	20	17	14	17	15
sp|P51608|MECP2_HUMAN	0	0	0	0	0	0	0	0	0	0	0	0
sp|P51610|HCFC1_HUMAN	2	0	0	4	0	0	16	0	0	14	0	0
sp|P51636|CAV2_HUMAN	2	3	2	1	4	2	1	2	2	1	1	2
sp|P51648|AL3A2_HUMAN	33	0	14	21	0	20	7	0	5	6	0	6
sp|P51649|SSDH_HUMAN	0	0	0	2	3	4	0	0	0	0	0	0
sp|P51659|DHB4_HUMAN	112	99	104	106	114	118	32	25	35	41	37	38
sp|P51665|PSMD7_HUMAN	2	6	5	3	3	1	15	16	21	15	16	17
sp|P51688|SPHM_HUMAN	0	0	0	0	0	0	0	0	0	0	0	0
sp|P51692|STA5B_HUMAN	0	0	0	0	0	0	2	0	0	0	0	0
sp|P51784|UBP11_HUMAN	0	0	0	0	0	0	2	0	0	2	0	1
sp|P51788|CLCN2_HUMAN	0	0	0	0	0	0	0	0	0	0	0	0
sp|P51805|PLXA3_HUMAN	1	2	2	1	1	1	0	0	0	0	0	0
sp|P51809|VAMP7_HUMAN	8	11	16	8	11	12	8	11	11	6	10	7
sp|P51812|KS6A3_HUMAN;sp|Q15349|KS6A2_HUMAN;sp|Q9UK32|KS6A6_HUMAN	0	0	0	0	0	0	3	5	10	2	5	9
sp|P51857|AK1D1_HUMAN	0	0	0	0	1	1	1	1	1	1	0	1
sp|P51858|HDGF_HUMAN	1	0	0	3	3	5	12	16	25	16	24	25
sp|P51911|CNN1_HUMAN	4	17	14	0	0	0	5	16	19	0	0	0
sp|P51965|UB2E1_HUMAN	0	0	0	0	0	0	1	0	0	0	1	0
sp|P51970|NDUA8_HUMAN	18	23	17	16	15	11	5	9	7	5	5	4
sp|P51991|ROA3_HUMAN	6	14	18	12	22	25	19	36	43	25	46	47
sp|P52209|6PGD_HUMAN	1	0	1	0	2	4	25	11	27	29	21	16
sp|P52272|HNRPM_HUMAN	30	54	63	31	40	53	50	46	73	35	30	40
sp|P52292|IMA1_HUMAN	8	11	8	6	9	9	23	24	34	15	20	19
sp|P52294|IMA5_HUMAN	0	0	0	0	0	0	12	7	6	9	5	5
sp|P52298|NCBP2_HUMAN	0	1	0	1	1	0	1	2	3	2	2	2
sp|P52306|GDS1_HUMAN	0	0	0	0	0	0	3	4	7	5	3	4
sp|P52429|DGKE_HUMAN	1	1	1	0	0	1	0	0	0	0	0	0
sp|P52434|RPAB3_HUMAN	0	4	2	0	1	1	6	5	6	5	5	5
sp|P52565|GDIR1_HUMAN	2	1	2	1	3	1	20	12	13	17	12	8
sp|P52594|AGFG1_HUMAN	2	3	3	0	3	4	2	3	5	3	7	8
sp|P52597|HNRPF_HUMAN	1	1	2	1	1	1	13	16	20	15	15	12
sp|P52655|TF2AA_HUMAN	0	0	0	0	0	0	1	2	1	1	1	2
sp|P52657|T2AG_HUMAN	0	0	0	0	0	0	1	1	1	0	1	2
sp|P52701|MSH6_HUMAN	0	0	0	1	1	1	13	2	3	16	25	21
sp|P52732|KIF11_HUMAN	2	2	3	1	6	5	3	0	14	3	6	18
sp|P52756|RBM5_HUMAN	0	0	0	0	0	0	2	0	1	1	0	0
sp|P52758|RIDA_HUMAN	3	5	5	0	2	2	1	3	3	2	3	2
sp|P52788|SPSY_HUMAN	0	0	0	0	0	0	3	7	9	4	6	5
sp|P52789|HXK2_HUMAN;sp|P52790|HXK3_HUMAN	6	5	9	22	8	14	12	15	24	16	14	15
sp|P52815|RM12_HUMAN	16	19	14	11	19	11	10	11	9	8	11	5
sp|P52848|NDST1_HUMAN	8	14	0	5	4	0	0	2	0	0	0	0
sp|P52888|THOP1_HUMAN	0	0	0	0	0	0	8	5	12	9	2	7
sp|P52895|AK1C2_HUMAN	0	0	0	0	0	0	0	0	0	0	1	2
sp|P52907|CAZA1_HUMAN	4	7	4	10	7	7	20	14	22	21	15	22
sp|P52943|CRIP2_HUMAN	3	4	5	2	3	4	4	8	4	5	4	4
sp|P52948|NUP98_HUMAN	3	7	6	3	8	8	23	22	30	13	22	18
sp|P53004|BIEA_HUMAN	0	0	0	0	0	0	6	5	8	4	7	8
sp|P53007|TXTP_HUMAN	34	43	50	22	32	32	8	9	10	7	7	8
sp|P53041|PPP5_HUMAN	0	0	0	0	0	0	9	4	5	11	6	7
sp|P53350|PLK1_HUMAN	1	4	7	1	2	2	1	8	9	1	1	1
sp|P53355|DAPK1_HUMAN	0	7	10	3	13	16	0	0	0	0	0	1
sp|P53365|ARFP2_HUMAN	0	0	0	0	0	0	1	2	4	2	0	0
sp|P53367|ARFP1_HUMAN	0	0	0	0	0	0	2	0	0	2	0	0
sp|P53384|NUBP1_HUMAN	0	0	0	0	0	0	2	2	5	0	3	4
sp|P53396|ACLY_HUMAN	57	52	86	45	45	58	101	116	153	65	90	104
sp|P53420|CO4A4_HUMAN	2	0	1	0	1	1	0	0	0	0	0	0
sp|P53582|MAP11_HUMAN	1	2	2	2	1	3	5	5	5	3	3	5
sp|P53597|SUCA_HUMAN	14	7	9	5	10	11	4	5	6	4	2	5
sp|P53611|PGTB2_HUMAN	0	0	0	0	0	0	3	1	3	0	1	1
sp|P53618|COPB_HUMAN	15	21	13	14	11	16	33	37	35	31	34	28
sp|P53621|COPA_HUMAN	23	71	56	32	47	39	77	94	115	60	61	73
sp|P53634|CATC_HUMAN	3	0	1	0	0	0	9	14	7	0	0	0
sp|P53675|CLH2_HUMAN	1	1	0	0	1	0	1	2	3	0	2	1
sp|P53680|AP2S1_HUMAN	3	7	4	2	5	5	4	5	4	3	2	5
sp|P53701|CCHL_HUMAN	23	25	34	29	24	32	8	9	10	6	7	7
sp|P53794|SC5A3_HUMAN	0	0	2	0	2	4	0	0	0	0	0	0
sp|P53801|PTTG_HUMAN	0	2	4	9	5	4	0	4	4	4	3	0
sp|P53985|MOT1_HUMAN	10	32	27	18	37	32	2	9	7	4	7	9
sp|P53992|SC24C_HUMAN	21	16	23	23	15	27	13	13	24	11	10	20
sp|P53999|TCP4_HUMAN	4	3	5	6	5	6	9	14	16	8	11	18
sp|P54098|DPOG1_HUMAN	18	26	31	2	10	12	2	2	2	1	2	1
sp|P54105|ICLN_HUMAN	1	0	0	1	0	1	3	3	3	3	3	4
sp|P54136|SYRC_HUMAN	5	16	16	17	13	18	35	33	39	47	33	37
sp|P54278|PMS2_HUMAN	0	0	0	0	0	0	1	0	0	0	0	0
sp|P54289|CA2D1_HUMAN;sp|Q9NY47|CA2D2_HUMAN	14	27	30	8	13	8	9	15	18	0	1	1
sp|P54577|SYYC_HUMAN	2	3	8	11	17	16	18	29	28	31	36	38
sp|P54578|UBP14_HUMAN	0	0	0	0	0	0	15	14	20	18	14	20
sp|P54619|AAKG1_HUMAN	0	1	1	1	0	1	1	2	4	1	3	2
sp|P54687|BCAT1_HUMAN	0	0	0	0	0	0	3	1	2	5	8	7
sp|P54709|AT1B3_HUMAN	16	17	20	16	18	22	4	8	6	5	4	6
sp|P54725|RD23A_HUMAN	0	0	0	0	0	0	5	1	1	3	2	2
sp|P54727|RD23B_HUMAN	1	0	0	0	1	0	9	13	14	11	14	11
sp|P54760|EPHB4_HUMAN;sp|P54753|EPHB3_HUMAN	2	0	13	2	0	2	0	0	3	0	0	0
sp|P54802|ANAG_HUMAN	1	0	0	0	0	0	0	0	0	0	0	0
sp|P54819|KAD2_HUMAN	28	17	22	37	24	27	23	29	21	20	23	21
sp|P54886|P5CS_HUMAN	114	134	136	93	93	85	25	35	40	25	25	25
sp|P54920|SNAA_HUMAN;sp|Q9H115|SNAB_HUMAN	12	15	23	14	22	22	17	15	21	19	18	21
sp|P55010|IF5_HUMAN	0	0	0	2	1	0	13	14	12	13	12	11
sp|P55011|S12A2_HUMAN;sp|Q13621|S12A1_HUMAN	42	46	55	26	35	42	3	10	8	0	6	8
sp|P55036|PSMD4_HUMAN	0	0	0	0	1	0	7	11	9	8	8	10
sp|P55039|DRG2_HUMAN	0	0	0	0	0	0	4	3	5	1	2	1
sp|P55060|XPO2_HUMAN	19	15	11	21	14	20	67	61	70	53	57	67
sp|P55061|BI1_HUMAN	3	4	4	2	7	3	1	1	2	3	0	2
sp|P55072|TERA_HUMAN	43	41	54	31	40	35	70	62	91	57	64	47
sp|P55084|ECHB_HUMAN	51	54	60	50	52	63	7	8	10	10	8	6
sp|P55145|MANF_HUMAN	14	17	10	8	7	7	11	10	12	5	11	6
sp|P55196|AFAD_HUMAN	0	0	0	10	1	6	1	0	0	0	0	0
sp|P55209|NP1L1_HUMAN	6	6	6	10	14	10	19	18	28	16	19	17
sp|P55263|ADK_HUMAN	0	0	0	0	0	0	11	6	6	10	6	4
sp|P55265|DSRAD_HUMAN	8	10	14	5	8	12	20	24	26	14	13	24
sp|P55268|LAMB2_HUMAN	0	0	0	7	2	7	0	0	0	0	0	0
sp|P55290|CAD13_HUMAN	7	5	11	12	10	11	1	6	8	9	6	9
sp|P55327|TPD52_HUMAN	0	1	0	7	8	7	9	10	9	13	17	11
sp|P55735|SEC13_HUMAN	6	6	8	4	5	8	10	11	19	6	11	9
sp|P55769|NH2L1_HUMAN	1	4	6	1	4	4	5	10	10	5	9	6
sp|P55786|PSA_HUMAN;sp|A6NEC2|PSAL_HUMAN	11	7	2	7	8	10	34	31	31	27	28	29
sp|P55789|ALR_HUMAN	1	1	0	3	2	1	2	2	0	1	0	1
sp|P55795|HNRH2_HUMAN	2	2	1	2	0	0	10	6	7	8	4	3
sp|P55809|SCOT1_HUMAN;sp|Q9BYC2|SCOT2_HUMAN	98	93	113	66	100	91	25	25	31	23	20	20
sp|P55884|EIF3B_HUMAN	5	8	8	6	7	7	46	41	77	28	31	35
sp|P55957|BID_HUMAN	3	2	4	3	0	4	7	6	4	5	5	3
sp|P56134|ATPK_HUMAN	22	21	21	23	19	18	4	5	7	4	3	4
sp|P56182|RRP1_HUMAN	0	2	2	1	2	1	3	3	2	3	1	2
sp|P56192|SYMC_HUMAN	8	17	19	24	14	16	24	35	44	34	34	47
sp|P56199|ITA1_HUMAN	15	10	8	38	35	32	6	8	6	9	14	16
sp|P56211|ARP19_HUMAN	0	0	0	1	0	1	0	0	0	0	1	0
sp|P56378|68MP_HUMAN	4	7	5	1	1	0	0	0	0	0	0	0
sp|P56385|ATP5I_HUMAN	14	20	13	8	12	12	2	4	4	3	3	3
sp|P56537|IF6_HUMAN	3	6	5	4	6	5	10	14	13	13	12	8
sp|P56545|CTBP2_HUMAN	0	0	0	0	0	0	3	5	7	2	6	6
sp|P56556|NDUA6_HUMAN	8	10	12	1	4	3	3	4	3	0	1	0
sp|P56557|TM50B_HUMAN	0	0	0	0	0	0	0	0	0	0	0	0
sp|P56589|PEX3_HUMAN	7	9	11	5	4	8	1	5	7	1	1	3
sp|P56937|DHB7_HUMAN	5	4	4	1	2	0	1	1	2	0	0	0
sp|P57076|CU059_HUMAN	0	0	0	0	0	0	2	0	0	1	0	0
sp|P57081|WDR4_HUMAN	0	0	0	0	0	0	2	0	1	0	0	1
sp|P57088|TMM33_HUMAN	25	28	25	23	18	18	11	12	12	13	14	10
sp|P57105|SYJ2B_HUMAN	8	12	11	10	8	8	4	6	5	3	5	4
sp|P57678|GEMI4_HUMAN	1	8	8	8	5	7	15	14	18	11	11	10
sp|P57682|KLF3_HUMAN	0	0	0	0	0	0	0	0	0	0	0	0
sp|P57721|PCBP3_HUMAN	0	0	0	0	0	1	3	0	0	0	0	0
sp|P57740|NU107_HUMAN	3	4	3	1	5	6	13	16	18	11	13	16
sp|P57772|SELB_HUMAN	0	0	0	0	0	0	1	0	3	0	0	0
sp|P58107|EPIPL_HUMAN	4	3	7	2	7	6	72	103	117	113	150	135
sp|P58511|SI11A_HUMAN	0	1	1	0	1	1	0	0	0	0	0	0
sp|P58546|MTPN_HUMAN	0	0	0	0	0	0	7	8	8	3	8	5
sp|P58557|YBEY_HUMAN	1	2	1	2	2	1	0	1	1	0	1	0
sp|P59768|GBG2_HUMAN	0	0	0	1	1	1	0	0	0	0	1	1
sp|P59998|ARPC4_HUMAN	5	5	9	4	11	8	10	13	13	12	17	11
sp|P60033|CD81_HUMAN	2	7	5	3	8	5	4	5	6	3	5	3
sp|P60059|SC61G_HUMAN	3	5	6	1	2	2	3	3	5	3	3	3
sp|P60174|TPIS_HUMAN	11	9	12	22	20	19	41	43	40	54	46	44
sp|P60228|EIF3E_HUMAN	1	2	2	1	1	1	23	24	30	20	27	16
sp|P60468|SC61B_HUMAN	9	10	7	7	6	7	4	5	5	3	4	5
sp|P60510|PP4C_HUMAN	0	1	0	0	0	0	9	7	6	7	5	5
sp|P60520|GBRL2_HUMAN	4	4	5	0	3	0	3	4	3	0	2	1
sp|P60602|ROMO1_HUMAN	7	7	7	5	3	3	1	1	1	1	1	1
sp|P60604|UB2G2_HUMAN	5	3	7	2	5	4	3	3	2	1	2	2
sp|P60660|MYL6_HUMAN	13	13	13	11	13	11	16	18	19	18	21	20
sp|P60709|ACTB_HUMAN	2	0	0	2	0	0	1	0	0	2	0	0
sp|P60763|RAC3_HUMAN	0	0	0	1	1	0	0	0	0	0	0	0
sp|P60842|IF4A1_HUMAN	29	44	39	26	23	18	71	112	150	49	54	69
sp|P60866|RS20_HUMAN	8	4	7	5	6	7	7	10	10	8	10	6
sp|P60880|SNP25_HUMAN	0	0	0	0	1	0	0	0	0	0	0	0
sp|P60891|PRPS1_HUMAN;sp|P21108|PRPS3_HUMAN	1	2	5	0	1	7	9	15	19	7	10	14
sp|P60900|PSA6_HUMAN	2	3	3	4	5	2	16	22	18	15	14	15
sp|P60903|S10AA_HUMAN	5	9	9	5	8	5	5	6	10	5	7	6
sp|P60953|CDC42_HUMAN	9	0	0	9	0	0	10	0	0	10	0	0
sp|P60981|DEST_HUMAN	3	5	5	2	5	3	8	20	21	9	20	10
sp|P60983|GMFB_HUMAN	1	0	0	0	0	0	4	0	0	2	0	0
sp|P61006|RAB8A_HUMAN	12	0	17	12	0	12	8	0	10	5	0	9
sp|P61009|SPCS3_HUMAN	10	11	12	7	6	5	3	4	4	4	4	5
sp|P61011|SRP54_HUMAN	3	9	4	5	6	5	8	10	9	9	7	3
sp|P61019|RAB2A_HUMAN	25	32	36	29	28	36	13	18	21	14	16	16
sp|P61020|RAB5B_HUMAN	8	9	12	10	9	9	5	11	8	8	8	5
sp|P61024|CKS1_HUMAN	1	1	1	0	1	0	1	2	2	1	2	2
sp|P61026|RAB10_HUMAN	18	17	28	18	20	38	9	12	16	14	11	14
sp|P61073|CXCR4_HUMAN	3	1	1	2	6	4	3	0	0	0	0	0
sp|P61081|UBC12_HUMAN	0	2	0	2	5	1	4	12	7	10	6	9
sp|P61086|UBE2K_HUMAN	1	0	1	1	3	0	11	8	9	10	11	7
sp|P61088|UBE2N_HUMAN;sp|Q5JXB2|UE2NL_HUMAN	3	2	4	5	6	3	11	13	13	9	13	11
sp|P61106|RAB14_HUMAN	21	25	21	27	29	29	16	21	23	23	25	21
sp|P61158|ARP3_HUMAN;sp|Q9P1U1|ARP3B_HUMAN;sp|Q9C0K3|ARP3C_HUMAN	12	15	15	12	20	16	21	20	24	26	29	20
sp|P61160|ARP2_HUMAN	8	7	12	9	8	8	9	14	14	14	16	20
sp|P61163|ACTZ_HUMAN;sp|P42025|ACTY_HUMAN	1	0	0	5	0	0	11	0	0	7	0	0
sp|P61165|TM258_HUMAN	4	10	9	3	4	4	1	4	3	2	2	3
sp|P61201|CSN2_HUMAN	0	0	0	0	0	0	11	11	17	6	12	6
sp|P61218|RPAB2_HUMAN	0	0	0	0	0	0	1	1	0	0	0	0
sp|P61221|ABCE1_HUMAN	11	12	16	18	18	15	8	12	19	19	22	19
sp|P61224|RAP1B_HUMAN;sp|A6NIZ1|RP1BL_HUMAN	20	31	30	20	23	24	14	20	20	13	18	14
sp|P61225|RAP2B_HUMAN	4	9	9	8	10	10	3	7	6	4	6	2
sp|P61247|RS3A_HUMAN	14	21	29	18	22	19	24	33	52	22	31	31
sp|P61254|RL26_HUMAN	8	18	17	10	15	9	9	23	16	7	14	11
sp|P61289|PSME3_HUMAN	9	9	5	8	8	4	18	19	23	13	13	13
sp|P61313|RL15_HUMAN	24	37	38	29	32	26	21	46	42	27	34	26
sp|P61326|MGN_HUMAN	0	0	0	0	0	0	1	1	1	1	1	0
sp|P61353|RL27_HUMAN	20	27	29	14	19	17	12	21	23	12	11	15
sp|P61421|VA0D1_HUMAN	6	10	9	7	6	10	3	6	10	3	5	7
sp|P61513|RL37A_HUMAN;sp|A6NKH3|RL37L_HUMAN	5	7	11	4	7	4	6	9	9	2	7	8
sp|P61586|RHOA_HUMAN	18	21	24	18	22	22	13	21	29	15	25	19
sp|P61599|NAA20_HUMAN	0	0	1	0	0	0	1	3	3	0	2	2
sp|P61604|CH10_HUMAN	31	79	68	14	48	27	9	21	22	6	25	17
sp|P61619|S61A1_HUMAN;sp|Q9H9S3|S61A2_HUMAN	43	67	66	39	54	48	8	20	20	5	9	9
sp|P61626|LYSC_HUMAN	3	0	0	3	0	0	3	0	0	2	0	0
sp|P61758|PFD3_HUMAN	0	0	0	1	2	1	10	12	12	13	10	8
sp|P61764|STXB1_HUMAN	1	1	6	2	5	8	2	3	6	4	7	7
sp|P61769|B2MG_HUMAN	9	10	10	8	10	6	6	7	9	5	7	4
sp|P61803|DAD1_HUMAN	31	31	32	23	28	32	9	11	9	12	15	14
sp|P61916|NPC2_HUMAN	3	3	3	3	3	2	4	6	4	5	4	5
sp|P61923|COPZ1_HUMAN	3	4	4	6	4	3	8	4	6	9	5	5
sp|P61956|SUMO2_HUMAN;sp|Q6EEV6|SUMO4_HUMAN;sp|P55854|SUMO3_HUMAN	7	0	0	4	0	0	14	0	0	8	0	0
sp|P61960|UFM1_HUMAN	4	3	3	1	1	0	3	3	3	2	2	2
sp|P61962|DCAF7_HUMAN	0	0	0	0	0	0	0	2	3	1	1	1
sp|P61964|WDR5_HUMAN	2	3	3	4	3	3	4	7	7	4	6	8
sp|P61966|AP1S1_HUMAN	1	1	2	1	0	0	1	4	3	1	2	1
sp|P61970|NTF2_HUMAN	1	0	1	1	1	0	9	9	11	8	13	10
sp|P61978|HNRPK_HUMAN	15	35	32	23	36	36	36	75	95	46	90	88
sp|P61981|1433G_HUMAN	7	3	5	6	4	5	17	23	15	15	17	13
sp|P62070|RRAS2_HUMAN	6	8	7	6	4	5	3	4	4	3	2	4
sp|P62072|TIM10_HUMAN	11	9	9	8	9	5	3	1	1	5	2	1
sp|P62081|RS7_HUMAN	11	15	15	19	14	13	19	20	27	20	11	11
sp|P62136|PP1A_HUMAN	4	6	20	8	5	20	8	9	27	8	7	24
sp|P62140|PP1B_HUMAN	12	16	8	18	19	6	22	20	8	20	18	12
sp|P62166|NCS1_HUMAN	0	0	1	2	2	0	1	4	2	1	4	2
sp|P62191|PRS4_HUMAN	3	4	2	4	1	1	14	9	12	18	10	9
sp|P62195|PRS8_HUMAN	3	0	0	5	2	2	26	21	22	23	20	21
sp|P62241|RS8_HUMAN	15	27	21	18	20	18	27	45	43	33	29	35
sp|P62244|RS15A_HUMAN	5	12	10	3	11	5	8	30	23	8	16	6
sp|P62249|RS16_HUMAN	12	18	17	13	17	13	23	25	34	16	16	14
sp|P62253|UB2G1_HUMAN	0	0	0	0	0	0	1	1	1	0	0	0
sp|P62256|UBE2H_HUMAN	0	0	0	0	1	0	3	7	4	2	5	3
sp|P62258|1433E_HUMAN	25	19	18	25	26	21	67	58	78	66	76	61
sp|P62263|RS14_HUMAN	12	13	16	13	8	13	15	24	26	13	13	14
sp|P62266|RS23_HUMAN	6	10	7	5	5	7	11	13	15	10	8	5
sp|P62269|RS18_HUMAN	12	17	16	13	23	14	18	21	23	12	22	15
sp|P62273|RS29_HUMAN	3	3	4	2	3	2	3	3	6	3	3	3
sp|P62277|RS13_HUMAN	16	15	14	16	14	10	11	15	17	13	10	8
sp|P62280|RS11_HUMAN	8	11	11	10	13	14	17	27	23	13	18	14
sp|P62304|RUXE_HUMAN	2	2	2	1	2	1	6	12	11	9	8	8
sp|P62306|RUXF_HUMAN	1	0	0	1	0	0	5	5	5	4	4	3
sp|P62308|RUXG_HUMAN;sp|A8MWD9|RUXGL_HUMAN	0	2	2	0	1	2	3	8	6	2	7	5
sp|P62310|LSM3_HUMAN	1	1	2	1	3	2	2	2	2	2	2	3
sp|P62312|LSM6_HUMAN	0	0	0	0	0	0	2	3	4	2	4	2
[truncated: 4,730 more rows]
